# Supplementary material
Source: Research Square preprint supplement (doi:10.21203/rs.3.rs-7078079/v1)
Supplement: Supplementary file 1 [file c81378b87b93c9c1dd1d773b.xlsx]

## Sheet: Supplementary Tables
Index
Supplementary Table	1	KOs for key metabolic processes deteted in the SCALE gene catalogue
Supplementary Table	2	Taxonomy and key information from the SCALE MAGs compendium
Supplementary Table	3	Novel MAGs identified within the SCALE MAGs compendium
Supplementary Table	4	CAZymes identified in SCALE MAGs compendium
Supplementary Table	5	Number of key KOs for carbon fixation and oxidation pathways identified in each of 190 potential chemolithotrophic MAGs
Supplementary Table	6	Number of CAZymes identified in each of 190 potential chemolithotrophic MAGs
Supplementary Table	7	Read mapping of 44 metagenomes to 190 potential chemolithotrophic MAGs

## Sheet: Supp. Table 1
KO	Name	Pathway Annotation	Metabolism
K00855	PRK, prkB; phosphoribulokinase [EC:2.7.1.19]	Calvin Cycle	Carbon metabolism/autotrophic pathways
K01601	rbcL; ribulose-bisphosphate carboxylase large chain [EC:4.1.1.39]	Calvin Cycle	Carbon metabolism/autotrophic pathways
K01602	rbcS; ribulose-bisphosphate carboxylase small chain [EC:4.1.1.39]	Calvin Cycle	Carbon metabolism/autotrophic pathways
K08691	mcl; malyl-CoA/(S)-citramalyl-CoA lyase [EC:4.1.3.24 4.1.3.25]	3-Hydroxypropionate bi-cycle|Ethylmalonyl pathway | Formaldehyde assimilation	Carbon metabolism/autotrophic pathways
K14470	mct; 2-methylfumaryl-CoA isomerase [EC:5.4.1.3]	3-Hydroxypropionate bi-cycle	Carbon metabolism/autotrophic pathways
K09709	meh; 3-methylfumaryl-CoA hydratase [EC:4.2.1.153]	3-Hydroxypropionate bi-cycle	Carbon metabolism/autotrophic pathways
K15016	enoyl-CoA hydratase / 3-hydroxyacyl-CoA dehydrogenase [EC:4.2.1.17 1.1.1.35]	Dicarboxylate-hydroxybutyrate cycle | Hydroxypropionate-hydroxybutylate cycle	Carbon metabolism/autotrophic pathways
K03519	coxM, cutM; aerobic carbon-monoxide dehydrogenase medium subunit [EC:1.2.5.3]	CO-Oxidation (C1 metabolism)	CO-Oxidation
K03518	coxS; aerobic carbon-monoxide dehydrogenase large subunit [EC:1.2.5.3]	CO-Oxidation (C1 metabolism)	CO-Oxidation
K00320	mer; 5,10-methylenetetrahydromethanopterin reductase [EC:1.5.98.2]	C1 metabolism/Methanogenesis	Methane metabolism
K00201	fwdB, fmdB; formylmethanofuran dehydrogenase subunit B [EC:1.2.7.12]	C1 metabolism/Methanogenesis	Methane metabolism
K00202	fwdC, fmdC; formylmethanofuran dehydrogenase subunit C [EC:1.2.7.12]	C1 metabolism/Methanogenesis	Methane metabolism
K00672	ftr; formylmethanofuran--tetrahydromethanopterin N-formyltransferase [EC:2.3.1.101].	C1 metabolism/Methanogenesis	Methane metabolism
K03390	hdrC; heterodisulfide reductase subunit C [EC:1.8.98.1]	C1 metabolism/Methanogenesis	Methane metabolism
K14083	mttB; trimethylamine---corrinoid protein Co-methyltransferase [EC:2.1.1.250]	C1 metabolism/Methanogenesis	Methane metabolism
K00577	mtrA; tetrahydromethanopterin S-methyltransferase subunit A [EC:2.1.1.86]	C1 metabolism/Methanogenesis	Methane metabolism
K05979	comB; 2-phosphosulfolactate phosphatase [EC:3.1.3.71]	Coenzyme M biosynthesis	Methane metabolism
K06034	comD; sulfopyruvate decarboxylase subunit alpha [EC:4.1.1.79]	Coenzyme M biosynthesis	Methane metabolism
K08097	comA; phosphosulfolactate synthase [EC:4.4.1.19]	Coenzyme M biosynthesis	Methane metabolism
K13039	comE; sulfopyruvate decarboxylase subunit beta [EC:4.1.1.79]	Coenzyme M biosynthesis	Methane metabolism
K10944	pmoA-amoA; methane/ammonia monooxygenase subunit A [EC:1.14.18.3 1.14.99.39]	Nitrification|Methane oxidation	Nitrogen /Methene metabolism
K10945	pmoB-amoB; methane/ammonia monooxygenase subunit B	Nitrification|Methane oxidation	Nitrogen /Methene metabolism
K10946	pmoC-amoC; methane/ammonia monooxygenase subunit C	Nitrification|Methane oxidation	Nitrogen /Methene metabolism
K10535	hao; hydroxylamine dehydrogenase [EC:1.7.2.6]	Nitrification	Nitrogen metabolism
K00371	narH, narY, nxrB; nitrate reductase / nitrite oxidoreductase, beta subunit [EC:1.7.5.1 1.7.99.-]	Nitrification|Denitrification|Dissimilatory nitrate reduction	Nitrogen metabolism
K00372	nasA; assimilatory nitrate reductase catalytic subunit [EC:1.7.99.4]	Assimilatory nitrate reduction	Nitrogen metabolism
K00362	nirB; nitrite reductase (NADH) large subunit [EC:1.7.1.15]	Dissimilatory nitrate reduction	Nitrogen metabolism
K00363	nirD; nitrite reductase (NADH) small subunit [EC:1.7.1.15]	Dissimilatory nitrate reduction	Nitrogen metabolism
K00368	nirK; nitrite reductase (NO-forming) [EC:1.7.2.1]	Denitrification	Nitrogen metabolism
K15864	nirS; nitrite reductase (NO-forming) / hydroxylamine reductase [EC:1.7.2.1 1.7.99.1]	Denitrification	Nitrogen metabolism
K04561	norB; nitric oxide reductase subunit B [EC:1.7.2.5]	Denitrification	Nitrogen metabolism
K02305	norC; nitric oxide reductase subunit C	Denitrification	Nitrogen metabolism
K00376	nosZ; nitrous-oxide reductase [EC:1.7.2.4]	Denitrification	Nitrogen metabolism
K00374	narI, narV; nitrate reductase gamma subunit [EC:1.7.5.1 1.7.99.-]	Denitrification|Dissimilatory nitrate reduction	Nitrogen metabolism
K02567	napA; periplasmic nitrate reductase NapA [EC:1.7.99.-]	Denitrification|Dissimilatory nitrate reduction	Nitrogen metabolism
K02568	napB; cytochrome c-type protein NapB	Denitrification|Dissimilatory nitrate reduction	Nitrogen metabolism
K17222	soxA; sulfur-oxidizing protein SoxA	Thiosulfate oxidation by SOX complex	Sulfur metabolism
K17223	soxX; sulfur-oxidizing protein SoxX	Thiosulfate oxidation by SOX complex	Sulfur metabolism
K17224	soxB; sulfur-oxidizing protein SoxB	Thiosulfate oxidation by SOX complex	Sulfur metabolism
K17225	soxC; sulfane dehydrogenase subunit SoxC	Thiosulfate oxidation by SOX complex	Sulfur metabolism
K17226	soxY; sulfur-oxidizing protein SoxY	Thiosulfate oxidation by SOX complex	Sulfur metabolism
K17227	soxZ; sulfur-oxidizing protein SoxZ	Thiosulfate oxidation by SOX complex	Sulfur metabolism
K00394	aprA; adenylylsulfate reductase, subunit A [EC:1.8.99.2]	Dissimilatory sulfate reduction	Sulfur metabolism
K00395	aprB; adenylylsulfate reductase, subunit B [EC:1.8.99.2]	Dissimilatory sulfate reduction	Sulfur metabolism
K11180	dsrA; dissimilatory sulfite reductase alpha subunit [EC:1.8.99.5]	Dissimilatory sulfate reduction	Sulfur metabolism
K11181	dsrB; dissimilatory sulfite reductase beta subunit [EC:1.8.99.5]	Dissimilatory sulfate reduction	Sulfur metabolism

## Sheet: Supp. Table 2
MAG ID	Domain	Phylum	Class	Order	Family	Genus	Species	Completeness	Contamination	Genome size (bp)	GC content (%)	Coding density	No. genes	No. contigs	Longest contig (bp)	Mean contig length (bp)	N50 contigs (bp)	5S rRNA	16S rRNA	23S rRNA	tRNA
Acidi_1501	Bacteria	Actinobacteriota	Acidimicrobiia	Acidimicrobiales	MedAcidi-G1	S20-B6	S20-B6 sp002699725	91.29	0.88	2128041	69.2583	0.943023	2218	193	45776	11026.1	15092	1	0	0	34
Acidi_1502	Bacteria	Actinobacteriota	Acidimicrobiia	Acidimicrobiales	MedAcidi-G1	S20-B6	S20-B6 sp002699725	87.46	1.69	2116074	69.2954	0.944072	2174	172	51580	12302.8	17982	0	0	0	40
Acidi_1503	Bacteria	Actinobacteriota	Acidimicrobiia	Acidimicrobiales	MedAcidi-G1	S20-B6	S20-B6 sp002699725	87.42	1.57	2112782	69.2075	0.942626	2329	342	31127	6177.73	8487	0	0	0	36
Acidi_1504	Bacteria	Actinobacteriota	Acidimicrobiia	Acidimicrobiales	MedAcidi-G1	S20-B6	S20-B6 sp002699725	93.77	2.5	2143797	69.283	0.945429	2191	164	72117	13071.9	20968	1	0	0	35
Acidi_1505	Bacteria	Actinobacteriota	Acidimicrobiia	Acidimicrobiales	TK06	UBA2110	UBA2110 sp002331465	71.36	1.48	2065007	54.4315	0.937507	2275	355	36890	5816.92	6543	0	0	0	24
Acidi_1506	Bacteria	Actinobacteriota	Acidimicrobiia	Acidimicrobiales	MedAcidi-G1	S20-B6	S20-B6 sp002699725	75.31	1.7	1577489	69.2312	0.942267	1932	455	15550	3467.01	4184	0	0	0	10
Acidi_1507	Bacteria	Actinobacteriota	Acidimicrobiia	Acidimicrobiales	MedAcidi-G1	JAKUSA01	JAKUSA01 sp022449565	80.33	2.83	2254123	65.8516	0.938538	2556	535	32993	4213.31	5557	0	0	0	32
Acidi_201	Bacteria	Actinobacteriota	Acidimicrobiia	Acidimicrobiales	MedAcidi-G1	UBA9410	UBA9410 sp014240365	69.16	1.96	1571186	67.5362	0.938068	1705	249	35041	6309.98	7394	0	0	0	23
Acidi_202	Bacteria	Actinobacteriota	Acidimicrobiia	Acidimicrobiales	MedAcidi-G1	UBA9410	UBA9410 sp014240365	71.9	3.57	1547946	67.5977	0.94012	1720	259	38766	5976.63	6310	0	0	0	21
Acidi_203	Bacteria	Actinobacteriota	Acidimicrobiia	Acidimicrobiales	MedAcidi-G1	S20-B6	S20-B6 sp002699725	68.03	3.74	1695054	69.3271	0.944488	2255	763	9394	2221.56	2432	0	0	0	10
Acidi_204	Bacteria	Actinobacteriota	Acidimicrobiia	Acidimicrobiales	MedAcidi-G1	UBA9410	UBA9410 sp014240365	77.11	1.01	1580593	67.6885	0.938878	1737	227	31526	6962.96	8313	0	0	0	15
Acidi_205	Bacteria	Actinobacteriota	Acidimicrobiia	Acidimicrobiales	TK06	UBA9040	UBA9040 sp905182565	93.51	1.62	2515648	47.5031	0.919254	2520	104	149284	24188.9	41087	1	1	0	45
Acidi_206	Bacteria	Actinobacteriota	Acidimicrobiia	Acidimicrobiales	TK06	UBA2110	UBA2110 sp002331465	74.75	2.65	2258958	54.3243	0.935023	2439	335	30579	6743.16	7838	0	0	0	38
Acidi_207	Bacteria	Actinobacteriota	Acidimicrobiia	Acidimicrobiales	MedAcidi-G1	S20-B6	S20-B6 sp002699725	83.55	2.36	1952816	69.288	0.946026	2265	480	22953	4068.37	5196	0	0	0	14
Acidi_208	Bacteria	Actinobacteriota	Acidimicrobiia	Acidimicrobiales	MedAcidi-G1	UBA9410	UBA9410 sp014240365	77.27	1.74	1688164	67.5415	0.936734	1803	207	50032	8155.38	11561	0	0	0	24
Acidi_210	Bacteria	Actinobacteriota	Acidimicrobiia	Acidimicrobiales	MedAcidi-G1	UBA9410	UBA9410 sp913030665	90.19	0.86	2043585	67.9483	0.937604	2111	185	70751	11046.4	17665	0	0	0	32
Acidi_211	Bacteria	Actinobacteriota	Acidimicrobiia	Acidimicrobiales	TK06	UBA2110	UBA2110 sp002331465	54.51	0.99	1456627	54.2001	0.935698	1692	339	15408	4296.83	4379	0	0	0	17
Acidi_212	Bacteria	Actinobacteriota	Acidimicrobiia	Acidimicrobiales	TK06	UBA2110	UBA2110 sp002331465	97.2	5.07	3067581	54.6687	0.929959	3140	245	163412	12520.7	43796	0	0	0	46
Acidi_213	Bacteria	Actinobacteriota	Acidimicrobiia	Acidimicrobiales	MedAcidi-G1	UBA9410	UBA9410 sp913030665	73.29	0.76	1581135	68.3494	0.944131	1670	194	47071	8150.18	15911	0	1	0	19
Acidi_214	Bacteria	Actinobacteriota	Acidimicrobiia	Acidimicrobiales	MedAcidi-G1	UBA9410	UBA9410 sp022452035	80.04	2.5	2227677	67.0841	0.938767	2352	260	67535	8567.99	14451	0	0	0	38
Acidi_215	Bacteria	Actinobacteriota	Acidimicrobiia	Acidimicrobiales	MedAcidi-G1	S20-B6	S20-B6 sp002699725	93.74	3	2235893	69.0096	0.945189	2463	447	30189	5002	7808	0	0	0	26
Acidi_216	Bacteria	Actinobacteriota	Acidimicrobiia	Acidimicrobiales	MedAcidi-G1	UBA9410	UBA9410 sp913030665	93.3	1.68	2063142	67.9212	0.934913	2096	140	64179	14736.7	22354	0	0	0	36
Acidi_217	Bacteria	Actinobacteriota	Acidimicrobiia	Acidimicrobiales	MedAcidi-G1	UBA9410	UBA9410 sp022452035	80.51	1.59	1922533	67.2231	0.943444	2076	340	39694	5654.51	7755	0	0	0	27
Acidi_218	Bacteria	Actinobacteriota	Acidimicrobiia	Acidimicrobiales	MedAcidi-G1	UBA9410	UBA9410 sp022452035	73.57	4.77	1902659	66.8534	0.93594	2205	472	23838	4031.06	4623	1	1	1	15
Acidi_219	Bacteria	Actinobacteriota	Acidimicrobiia	Acidimicrobiales	MedAcidi-G1	S20-B6	S20-B6 sp002699725	88.55	4.77	2161037	69.0548	0.944305	2530	567	25958	3811.35	5804	0	0	0	29
Acidi_220	Bacteria	Actinobacteriota	Acidimicrobiia	Acidimicrobiales	MedAcidi-G1	UBA9410	UBA9410 sp913030665	90.24	1.87	2113591	67.9062	0.936549	2151	161	67343	13127.9	22907	0	1	0	33
Acidi_221	Bacteria	Actinobacteriota	Acidimicrobiia	Acidimicrobiales	MedAcidi-G1	UBA9410	UBA9410 sp022452035	75.17	1.79	1645316	67.6586	0.942161	1738	217	69550	7582.1	9415	0	1	0	26
Acidi_222	Bacteria	Actinobacteriota	Acidimicrobiia	Acidimicrobiales	MedAcidi-G1	S20-B6	S20-B6 sp002699725	88.41	4.97	2071448	69.3056	0.946555	2482	633	14891	3272.43	4372	0	0	0	20
Acidi_223	Bacteria	Actinobacteriota	Acidimicrobiia	Acidimicrobiales	MedAcidi-G1	UBA9410	UBA9410 sp014240365	79.56	1.02	1589890	67.6057	0.939512	1697	187	99233	8502.09	15240	0	0	0	20
Acidi_224	Bacteria	Actinobacteriota	Acidimicrobiia	Acidimicrobiales	TK06	UBA2110	UBA2110 sp002331465	63.89	0.91	1875274	54.3385	0.936115	2128	363	16008	5166.04	5712	0	0	0	29
Acidi_225	Bacteria	Actinobacteriota	Acidimicrobiia	Acidimicrobiales	MedAcidi-G1	S20-B6	S20-B6 sp002699725	69.93	0.94	1831739	69.1895	0.944565	2194	485	22388	3776.78	4340	0	0	0	17
Acidi_226	Bacteria	Actinobacteriota	Acidimicrobiia	Acidimicrobiales	TK06	UBA2110	UBA2110 sp002331465	80.7	4.39	2500506	54.4879	0.931673	2883	574	21808	4356.28	4876	1	0	0	29
Acidi_227	Bacteria	Actinobacteriota	Acidimicrobiia	Acidimicrobiales	MedAcidi-G1	S20-B6	S20-B6 sp002699725	90.1	3.16	2219800	68.966	0.943562	2346	257	58724	8637.35	13550	0	1	0	34
Acidi_228	Bacteria	Actinobacteriota	Acidimicrobiia	Acidimicrobiales	TK06	UBA2110	UBA2110 sp002331465	72.03	3.71	2182226	54.3274	0.938639	2346	312	29669	6994.31	8243	1	0	0	33
Acidi_229	Bacteria	Actinobacteriota	Acidimicrobiia	Acidimicrobiales	MedAcidi-G1	S20-B6	S20-B6 sp002699725	76.13	3.25	1715024	69.1614	0.946138	2256	765	9079	2241.86	2547	0	0	0	6
Acidi_230	Bacteria	Actinobacteriota	Acidimicrobiia	Acidimicrobiales	MedAcidi-G1	UBA9410	UBA9410 sp913030665	91.1	0.78	2068245	67.9889	0.93723	2131	172	73421	12024.7	19389	0	1	0	36
Acidi_231	Bacteria	Actinobacteriota	Acidimicrobiia	Acidimicrobiales	TK06	UBA2110	UBA2110 sp002331465	87.91	1.51	2443683	54.3109	0.936471	2593	273	51737	8951.22	12501	1	1	0	34
Acidi_501	Bacteria	Actinobacteriota	Acidimicrobiia	Acidimicrobiales	MedAcidi-G1	S20-B6	S20-B6 sp002699725	90.39	3.69	2166373	69.2603	0.946282	2387	427	31569	5073.47	7897	0	0	0	25
Acidi_502	Bacteria	Actinobacteriota	Acidimicrobiia	Acidimicrobiales	TK06	UBA2110	UBA2110 sp002331465	88.52	0.75	2502404	54.2932	0.935942	2626	234	52866	10694	14838	1	0	0	39
Acidi_503	Bacteria	Actinobacteriota	Acidimicrobiia	Acidimicrobiales	MedAcidi-G1	S20-B6	S20-B6 sp002699725	95.45	1.34	2086292	69.2647	0.945423	2152	179	55982	11655.3	16559	0	0	0	33
Acidi_504	Bacteria	Actinobacteriota	Acidimicrobiia	Acidimicrobiales	TK06	UBA2110	UBA2110 sp002331465	89.34	0.87	2553365	54.3701	0.93404	2691	265	42294	9635.34	13810	0	0	0	40
Acidi_505	Bacteria	Actinobacteriota	Acidimicrobiia	Acidimicrobiales	TK06	UBA2110	UBA2110 sp002331465	93.54	2.2	3011849	54.5252	0.934082	3017	211	146926	14274.2	31910	1	0	1	42
Acidi_506	Bacteria	Actinobacteriota	Acidimicrobiia	Acidimicrobiales	MedAcidi-G1	S20-B6	S20-B6 sp002699725	89.54	1.74	2113974	69.2945	0.945016	2189	170	84672	12435.1	18973	0	0	0	38
Acidi_507	Bacteria	Actinobacteriota	Acidimicrobiia	Acidimicrobiales	MedAcidi-G1	S20-B6	S20-B6 sp002699725	95.73	6.48	2455829	69.0593	0.943677	2535	310	68380	7922.03	19666	0	0	0	46
Acidi_508	Bacteria	Actinobacteriota	Acidimicrobiia	Acidimicrobiales	TK06	UBA2110	UBA2110 sp002331465	91.11	1.53	2480113	54.3499	0.936988	2593	240	41317	10333.8	14254	0	0	0	41
Acidi_509	Bacteria	Actinobacteriota	Acidimicrobiia	Acidimicrobiales	TK06	UBA2110	UBA2110 sp002331465	78.51	1.83	1979687	54.2677	0.935968	2205	369	16875	5365.01	5824	1	0	0	33
Acidi_510	Bacteria	Actinobacteriota	Acidimicrobiia	Acidimicrobiales	MedAcidi-G1	S20-B6	S20-B6 sp002699725	78.78	4.85	1816379	69.1096	0.945893	2314	706	14300	2572.77	2953	0	0	0	16
Acidi_511	Bacteria	Actinobacteriota	Acidimicrobiia	Acidimicrobiales	MedAcidi-G1	UBA9410	UBA9410 sp913030665	95.12	0.54	2124115	67.9615	0.935576	2150	155	65628	13704	19710	1	0	1	43
Acidi_512	Bacteria	Actinobacteriota	Acidimicrobiia	Acidimicrobiales	MedAcidi-G1	UBA9410	UBA9410 sp022452035	88.1	0.34	1900371	67.6398	0.941756	1958	169	118145	11244.8	17222	0	0	0	32
Acidi_513	Bacteria	Actinobacteriota	Acidimicrobiia	Acidimicrobiales	MedAcidi-G1	UBA9410	UBA9410 sp913030665	75.89	1.38	1934675	68.0091	0.936411	2059	245	37450	7896.63	11420	0	0	0	29
Acidi_514	Bacteria	Actinobacteriota	Acidimicrobiia	Acidimicrobiales	MedAcidi-G1	S20-B6	S20-B6 sp002699725	91.76	2.62	2042864	69.0927	0.944773	2148	220	40726	9285.75	11991	0	1	0	37
Acidi_515	Bacteria	Actinobacteriota	Acidimicrobiia	Acidimicrobiales	MedAcidi-G1	S20-B6	S20-B6 sp002699725	90.34	1.89	1983777	69.3012	0.943976	2106	250	30393	7935.11	9945	0	1	0	43
Acidi_516	Bacteria	Actinobacteriota	Acidimicrobiia	Acidimicrobiales	MedAcidi-G1	UBA9410	UBA9410 sp913030665	68.19	0.44	1559564	68.292	0.940964	1639	193	57286	8080.64	17333	0	1	1	18
Acidi_517	Bacteria	Actinobacteriota	Acidimicrobiia	Acidimicrobiales	TK06	UBA2110	UBA2110 sp002331465	93.23	2.24	2616609	54.3993	0.936723	2697	221	88312	11839.9	16485	0	0	0	38
Acidi_518	Bacteria	Actinobacteriota	Acidimicrobiia	Acidimicrobiales	MedAcidi-G1	UBA9410	UBA9410 sp022452035	78.39	3.46	1949367	67.0724	0.938633	2135	340	46807	5733.43	6918	1	0	1	27
Acidi_519	Bacteria	Actinobacteriota	Acidimicrobiia	Acidimicrobiales	MedAcidi-G1	S20-B6	S20-B6 sp002699725	90.5	2.22	2058647	69.0562	0.944953	2152	214	42907	9619.85	12526	0	0	0	36
Acidi_520	Bacteria	Actinobacteriota	Acidimicrobiia	Acidimicrobiales	TK06	UBA2110	UBA2110 sp002331465	88.12	3.65	2360495	54.3736	0.936233	2554	328	36536	7196.63	8958	0	0	0	36
Acidi_521	Bacteria	Actinobacteriota	Acidimicrobiia	Acidimicrobiales	MedAcidi-G1	UBA9410	UBA9410 sp913030665	92.37	0.72	2074745	68.0636	0.936098	2107	149	78605	13924.5	23333	0	1	0	35
Acidi_522	Bacteria	Actinobacteriota	Acidimicrobiia	Acidimicrobiales	MedAcidi-G1	UBA9410	UBA9410 sp022452035	91.36	0.76	1947351	67.6146	0.942394	1980	143	108980	13617.8	19640	0	0	0	41
Acidi_523	Bacteria	Actinobacteriota	Acidimicrobiia	Acidimicrobiales	MedAcidi-G1	S20-B6	S20-B6 sp002699725	89.47	1.46	2046402	69.2891	0.94625	2186	239	43103	8562.35	13217	0	0	0	32
Acidi_524	Bacteria	Actinobacteriota	Acidimicrobiia	Acidimicrobiales	TK06	UBA2110	UBA2110 sp002331465	86.57	1.72	2573100	54.3316	0.935271	2656	218	59902	11803.2	16742	1	0	0	42
Acidi_525	Bacteria	Actinobacteriota	Acidimicrobiia	Acidimicrobiales	MedAcidi-G1	S20-B6	S20-B6 sp002699725	67.71	4.39	1635748	69.1471	0.945826	2227	817	8987	2002.14	2124	0	0	0	7
Acidi_526	Bacteria	Actinobacteriota	Acidimicrobiia	Acidimicrobiales	TK06	UBA2110	UBA2110 sp002331465	71.82	1.4	2155959	54.342	0.937454	2383	372	31284	5795.59	6492	0	0	0	32
Acidi_527	Bacteria	Actinobacteriota	Acidimicrobiia	Acidimicrobiales	TK06	UBA2110	UBA2110 sp002331465	65.62	0.5	1853289	54.3849	0.934062	2127	381	15858	4864.28	5303	0	0	0	31
Acidi_528	Bacteria	Actinobacteriota	Acidimicrobiia	Acidimicrobiales	MedAcidi-G1	UBA9410	UBA9410 sp014240365	84.3	1.43	1953368	67.337	0.935402	2022	186	112898	10502	19054	0	0	0	31
Acidi_529	Bacteria	Actinobacteriota	Acidimicrobiia	Acidimicrobiales	TK06	UBA2110	UBA2110 sp002331465	84.06	0.78	2275299	54.3665	0.939866	2439	314	28296	7246.18	8424	1	0	0	30
Acidi_530	Bacteria	Actinobacteriota	Acidimicrobiia	Acidimicrobiales	MedAcidi-G1	UBA9410	UBA9410 sp913030665	60.08	0.69	1317000	68.3666	0.941637	1449	224	51643	5879.46	6081	0	1	0	14
Acidi_d01	Bacteria	Actinobacteriota	Acidimicrobiia	Acidimicrobiales	MedAcidi-G1	UBA9410	UBA9410 sp012961035	92.92	0.35	1997071	68.9519	0.938013	2032	197	57930	10137.4	16205	0	0	0	37
Acidi_d02	Bacteria	Actinobacteriota	Acidimicrobiia	Acidimicrobiales	MedAcidi-G1	UBA9410	UBA9410 sp012961035	96.29	1.19	2759759	67.838	0.930281	2787	355	82665	7773.97	14471	0	0	0	45
Acidi_d03	Bacteria	Actinobacteriota	Acidimicrobiia	Acidimicrobiales	MedAcidi-G1	UBA9410	UBA9410 sp012961035	95.91	0.49	2091363	68.9466	0.936164	2086	164	79361	12752.2	17592	1	1	1	34
Acidi_d04	Bacteria	Actinobacteriota	Acidimicrobiia	Acidimicrobiales	MedAcidi-G1	UBA9410	UBA9410 sp012961035	97.04	0.53	2468035	68.5766	0.93048	2478	255	90449	9678.57	19137	0	1	1	43
Acidi_d05	Bacteria	Actinobacteriota	Acidimicrobiia	Acidimicrobiales	MedAcidi-G1	UBA9410	UBA9410 sp012961035	95.62	0.49	2024811	68.9745	0.93922	2042	172	72611	11772.2	18032	0	0	0	27
Acidi_d06	Bacteria	Actinobacteriota	Acidimicrobiia	Acidimicrobiales	MedAcidi-G1	UBA9410	UBA9410 sp012961035	96.28	0.26	2308209	68.7582	0.934622	2268	137	101852	16848.2	30689	1	1	0	43
Alpha_1501	Bacteria	Proteobacteria	Alphaproteobacteria	Rhodospirillales_A	UBA2165	GCA-2712665	GCA-2712665 sp002938035	83.55	7.78	2466241	44.7454	0.897434	2542	425	24617	5802.92	6593	0	0	0	20
Alpha_1502	Bacteria	Proteobacteria	Alphaproteobacteria	HIMB59	GCA-002718135	MarineAlpha5-Bin3	MarineAlpha5-Bin3 sp002938255	62.77	3.22	1004986	32.6688	0.957608	1099	146	38683	6883.47	9337	0	0	0	12
Alpha_1503	Bacteria	Proteobacteria	Alphaproteobacteria	Rhodospirillales_A	Casp-alpha2	Casp-alpha2	Casp-alpha2 sp002938075	69.91	4.51	1852259	62.0792	0.907643	2359	860	9991	2153.79	2325	0	0	0	5
Alpha_201	Bacteria	Proteobacteria	Alphaproteobacteria	Rhodobacterales	Rhodobacteraceae	GCA-2697345	GCA-2697345 sp905181985	65.89	3.25	1819854	38.5885	0.920294	1941	383	23859	4751.58	5019	0	0	0	16
Alpha_202	Bacteria	Proteobacteria	Alphaproteobacteria	MED-G09	MED-G09	MED-G09	Unknown	66.13	0.07	1039571	32.4324	0.952267	1111	82	68441	12677.7	21931	0	1	0	24
Alpha_d01	Bacteria	Proteobacteria	Alphaproteobacteria	Pelagibacterales	Pelagibacteraceae	AG-414-E02	AG-414-E02 sp016764285	56.06	0.56	547524	30.6124	0.961417	630	97	23321	5644.58	6480	0	0	0	6
Alpha_d02	Bacteria	Proteobacteria	Alphaproteobacteria	Pelagibacterales	Pelagibacteraceae	AG-414-E02	AG-414-E02 sp016764285	53.02	0.02	538150	30.4608	0.961892	605	85	30997	6331.18	7049	0	0	0	2
Alpha_d03	Bacteria	Proteobacteria	Alphaproteobacteria	Rhodospirillales_A	UBA2165	TMED23	TMED23 sp913054205	60.61	4.49	1997723	49.6222	0.906241	2841	1063	7022	1879.33	2019	0	0	0	4
Alpha_d04	Bacteria	Proteobacteria	Alphaproteobacteria	Pelagibacterales	Pelagibacteraceae	AG-414-E02	AG-414-E02 sp016764285	70.93	2.02	769358	30.3197	0.960579	879	124	26011	6204.5	7921	0	0	0	5
Bacte_201	Bacteria	Bacteroidota	Bacteroidia	Flavobacteriales	Flavobacteriaceae	GCA-2700405	GCA-2700405 sp014239895	73.6	3.22	1077520	29.9896	0.959683	1152	265	31448	4066.11	4576	0	0	0	16
Bacte_202	Bacteria	Bacteroidota	Bacteroidia	Flavobacteriales	Flavobacteriaceae	GCA-2700405	GCA-2700405 sp014239895	74.2	1.23	1199557	29.7585	0.953503	1188	139	77119	8629.91	10778	2	0	1	25
Bacte_203	Bacteria	Bacteroidota	Bacteroidia	Flavobacteriales	Flavobacteriaceae	Marisimplicoccus	Marisimplicoccus framensis	96.14	0.01	1182352	29.6507	0.964391	1177	89	56490	13284.9	23525	0	0	0	26
Bacte_501	Bacteria	Bacteroidota	Bacteroidia	Flavobacteriales	Flavobacteriaceae	Marisimplicoccus	Marisimplicoccus sp002729755	50.7	1.23	889701	29.9349	0.962664	858	85	55101	10467.1	14686	0	1	0	15
Bacte_502	Bacteria	Bacteroidota	Bacteroidia	Flavobacteriales	Flavobacteriaceae	GCA-2700405	GCA-2700405 sp018657955	76.36	0.07	1323144	29.9475	0.954444	1221	81	65265	16335.1	27605	1	1	0	18
Bacte_503	Bacteria	Bacteroidota	Bacteroidia	Flavobacteriales	Flavobacteriaceae	MAG-121220-bin8	MAG-121220-bin8 sp012959395	83.24	3.26	1649161	29.2116	0.954622	1550	110	60359	14992.4	22630	1	0	0	22
Bacte_d01	Bacteria	Bacteroidota	Bacteroidia	Flavobacteriales	BACL11	DUAL01	DUAL01 sp012960835	74.8	2.61	1189944	34.235	0.95703	1441	541	10516	2199.53	2352	0	0	0	11
Bacte_d02	Bacteria	Bacteroidota	Bacteroidia	Flavobacteriales	Flavobacteriaceae	GCA-2700405	GCA-2700405 sp018657955	76.78	0.94	1267280	29.47	0.949419	1218	101	64715	12547.3	16075	1	0	0	17
Crenar_1501	Archaea	Crenarchaeota	Nitrososphaeria	Nitrososphaerales	Nitrosopumilaceae	Nitrosopumilus	Nitrosopumilus sp905616385	79.76	4.87	1019589	30.772	0.919496	1373	145	59792	7031.65	9255	1	0	0	38
Crenar_1502	Archaea	Crenarchaeota	Nitrososphaeria	Nitrososphaerales	Nitrosopumilaceae	Nitrosopelagicus	Unknown	50.8	0.99	538833	34.9951	0.932202	744	111	22313	4854.35	5165	1	0	0	18
Crenar_1503	Archaea	Crenarchaeota	Nitrososphaeria	Nitrososphaerales	Nitrosopumilaceae	Nitrosopelagicus	Unknown	52.96	1.41	609131	34.961	0.931749	835	117	24217	5206.25	5778	0	0	0	21
Crenar_1504	Archaea	Crenarchaeota	Nitrososphaeria	Nitrososphaerales	Nitrosopumilaceae	Nitrosopelagicus	Unknown	54.69	3.73	683359	33.1302	0.93444	901	146	16789	4680.54	4645	1	0	0	15
Crenar_1505	Archaea	Crenarchaeota	Nitrososphaeria	Nitrososphaerales	Nitrosopumilaceae	Nitrosopelagicus	Unknown	59.6	9.62	702753	35.2306	0.922381	924	139	15591	5055.78	5466	0	0	0	23
Crenar_201	Archaea	Crenarchaeota	Nitrososphaeria	Nitrososphaerales	Nitrosopumilaceae	Nitrosopumilus	Nitrosopumilus sp905612275	60.01	0.44	741848	30.5416	0.922417	1141	332	14116	2234.48	2493	1	0	0	10
Crenar_202	Archaea	Crenarchaeota	Nitrososphaeria	Nitrososphaerales	Nitrosopumilaceae	Nitrosopumilus	Nitrosopumilus sp905616385	67.21	1.17	915145	30.448	0.917344	1329	269	26489	3402.03	4314	1	0	0	29
Crenar_501	Archaea	Crenarchaeota	Nitrososphaeria	Nitrososphaerales	Nitrosopumilaceae	Nitrosopumilus	Nitrosopumilus sp905616385	59.63	3.76	833219	30.7373	0.925713	1144	165	33833	5049.81	5068	1	0	0	28
Crenar_503	Archaea	Crenarchaeota	Nitrososphaeria	Nitrososphaerales	Nitrosopumilaceae	Nitrosopumilus	Nitrosopumilus sp905616385	53.87	2.13	684746	30.6966	0.930019	954	146	20864	4690.04	4572	0	0	0	25
Cyano_201	Bacteria	Cyanobacteria	Cyanobacteriia	PCC-6307	Cyanobiaceae	Synechococcus_C	Unknown	75.88	0.94	1592357	54.5645	0.909084	1852	180	41217	8846.43	11813	0	0	0	29
Dehal_1502	Bacteria	Chloroflexota	Dehalococcoidia	UBA1151	UBA1328	UBA1328	UBA1328 sp002313245	67.7	5.24	1693576	57.9735	0.881652	2051	627	10478	2701.08	3056	0	0	0	16
Dehal_1503	Bacteria	Chloroflexota	Dehalococcoidia	UBA3495	UBA3495	UBA9611	UBA9611 sp009392075	80.31	7.16	2696478	58.0344	0.880619	2742	275	56097	9805.37	14088	1	1	0	24
Dehal_1504	Bacteria	Chloroflexota	Dehalococcoidia	UBA1151	UBA1328	UBA1328	UBA1328 sp002313245	67.67	3.85	1549356	58.0381	0.882589	1939	627	8742	2471.06	2827	0	0	0	7
Dehal_1505	Bacteria	Chloroflexota	Dehalococcoidia	UBA3495	UBA3495	UBA9611	UBA9611 sp009392075	92.81	5.74	2670268	58.0602	0.882257	2724	280	42502	9536.67	12868	0	0	0	24
Dehal_1506	Bacteria	Chloroflexota	Dehalococcoidia	SAR202	UBA826	UBA11996	UBA11996 sp009392675	55.66	2.28	1415120	42.6058	0.921771	1566	292	15961	4846.3	5198	0	0	0	25
Dehal_1507	Bacteria	Chloroflexota	Dehalococcoidia	UBA3495	UBA3495	UBA9611	UBA9611 sp009392075	77.05	6.54	2464893	58.2981	0.887338	2488	251	46184	9820.29	13603	0	0	0	19
Dehal_1508	Bacteria	Chloroflexota	Dehalococcoidia	SAR202	UBA11138	UBA1123	UBA1123 sp002313895	88.79	5.28	3156943	55.7153	0.864756	3297	302	56651	10453.5	14332	1	1	0	35
Dehal_1509	Bacteria	Chloroflexota	Dehalococcoidia	UBA1151	UBA1328	UBA1328	UBA1328 sp002313245	74.3	1.65	1834956	57.9529	0.876076	1944	301	21378	6096.2	6954	0	0	0	23
Dehal_1510	Bacteria	Chloroflexota	Dehalococcoidia	SAR202	UBA826	UBA11996	UBA11996 sp009392675	76.86	3.78	1802651	42.409	0.919987	1946	310	22356	5815	6480	0	0	0	26
Dehal_1511	Bacteria	Chloroflexota	Dehalococcoidia	UBA3495	UBA3495	UBA11650	UBA11650 sp002710215	74.11	6.06	2140871	57.7998	0.863596	2211	255	92381	8395.57	22797	1	1	1	12
Dehal_1512	Bacteria	Chloroflexota	Dehalococcoidia	SAR202	UBA11138	UBA1123	UBA1123 sp002313895	93.87	5.32	3237534	55.7391	0.86495	3403	303	75703	10684.9	14713	1	0	0	36
Dehal_201	Bacteria	Chloroflexota	Dehalococcoidia	UBA1151	UBA1328	UBA1328	Unknown	86.31	6.19	1983685	49.6143	0.870338	2034	364	24394	5449.68	7451	1	0	1	37
Dehal_202	Bacteria	Chloroflexota	Dehalococcoidia	UBA3495	UBA3495	UBA9611	UBA9611 sp012959605	68.28	7.57	2294227	55.2315	0.879464	2741	1013	11021	2264.78	2562	0	0	0	13
Dehal_203	Bacteria	Chloroflexota	Dehalococcoidia	UBA3495	UBA3495	UBA9611	UBA9611 sp012959605	73.48	6.33	2359293	54.5398	0.86617	2673	707	19063	3337.05	4082	0	0	1	18
Dehal_204	Bacteria	Chloroflexota	Dehalococcoidia	UBA2979	UBA2979	UBA2979	Unknown	54.66	4.18	1362411	45.5821	0.916058	1510	283	19474	4814.17	5077	1	1	0	32
Dehal_205	Bacteria	Chloroflexota	Dehalococcoidia	UBA3495	UBA3495	UBA9611	UBA9611 sp012959605	91.01	5.4	2833476	54.2758	0.860431	2848	341	91419	8309.31	14705	0	1	1	42
Dehal_206	Bacteria	Chloroflexota	Dehalococcoidia	UBA1151	UBA1151	GCA-2730555	Unknown	64.89	1.98	1459933	57.0811	0.875629	1598	325	14830	4492.1	4545	0	0	0	16
Dehal_207	Bacteria	Chloroflexota	Dehalococcoidia	UBA3495	UBA3495	UBA9611	UBA9611 sp012959605	81.95	6.65	3039749	54.8499	0.877528	3405	1138	18881	2671.13	3530	1	1	0	25
Dehal_208	Bacteria	Chloroflexota	Dehalococcoidia	UBA3495	UBA3495	UBA9611	UBA9611 sp012959605	79.76	8.6	2781405	54.8462	0.876941	3281	1120	20018	2483.4	2909	1	0	0	22
Dehal_209	Bacteria	Chloroflexota	Dehalococcoidia	UBA2979	UBA2979	UBA2979	Unknown	68.14	4.65	1535313	45.3749	0.92219	1658	271	21130	5665.36	6129	1	1	0	29
Dehal_210	Bacteria	Chloroflexota	Dehalococcoidia	Tepidiformales	Tepidiformaceae	JAKUNN01	Unknown	75.07	6.19	1332977	42.5042	0.935475	1519	242	19029	5508.17	6222	1	1	0	26
Dehal_211	Bacteria	Chloroflexota	Dehalococcoidia	UBA3495	UBA3495	UBA9611	UBA9611 sp012959605	95.45	4.55	2580489	54.4852	0.864935	2768	549	30868	4700.34	6068	1	1	1	23
Dehal_212	Bacteria	Chloroflexota	Dehalococcoidia	UBA1151	UBA1151	GCA-2730555	Unknown	62.09	0.46	1458925	57.1287	0.879785	1535	284	21531	5137.06	5577	0	1	0	15
Dehal_501	Bacteria	Chloroflexota	Dehalococcoidia	UBA3495	UBA3495	UBA9611	UBA9611 sp012959605	61.82	5.04	2153844	54.964	0.8694	2737	969	10055	2222.75	2438	1	1	0	8
Dehal_502	Bacteria	Chloroflexota	Dehalococcoidia	SAR202	UBA826	UBA11996	UBA11996 sp009392675	65.22	2.77	1554282	42.5837	0.919649	1738	320	17774	4857.13	5260	0	0	0	22
Dehal_503	Bacteria	Chloroflexota	Dehalococcoidia	UBA3495	UBA3495	UBA9611	UBA9611 sp012959605	78.34	5.87	2217134	54.788	0.874884	2580	750	12891	2956.18	3455	1	0	0	10
Dehal_504	Bacteria	Chloroflexota	Dehalococcoidia	UBA1151	UBA1151	GCA-2730555	Unknown	50.23	1.38	1264957	57.0491	0.872426	1386	295	13982	4287.99	4429	0	1	1	14
Dehal_505	Bacteria	Chloroflexota	Dehalococcoidia	UBA1151	UBA1151	GCA-2730555	Unknown	67.52	1.76	1863955	56.9643	0.876549	2156	632	15858	2949.3	3362	0	0	0	20
Dehal_506	Bacteria	Chloroflexota	Dehalococcoidia	UBA3495	UBA3495	UBA9611	UBA9611 sp012959605	87.93	5.38	2860793	54.9112	0.872392	3115	813	26556	3518.81	5366	1	0	0	29
Dehal_507	Bacteria	Chloroflexota	Dehalococcoidia	SAR202	UBA826	UBA11996	UBA11996 sp009392675	58.68	2.72	1301221	42.4829	0.922694	1431	282	20083	4614.26	4896	0	0	1	20
Dehal_508	Bacteria	Chloroflexota	Dehalococcoidia	UBA3495	UBA3495	UBA9611	UBA9611 sp012959605	73.23	4.51	2105176	54.7825	0.873484	2513	887	11327	2373.37	2662	1	0	0	8
Dehal_509	Bacteria	Chloroflexota	Dehalococcoidia	UBA3495	UBA3495	UBA9611	UBA9611 sp009391975	72.75	8.21	2474337	57.5183	0.881458	2555	336	38498	7364.1	9054	0	0	0	19
Dehal_510	Bacteria	Chloroflexota	Dehalococcoidia	UBA3495	UBA3495	UBA9611	UBA9611 sp012959605	73.82	5.64	2128665	54.8103	0.876937	2185	310	56962	6866.66	7766	1	0	0	23
Dehal_d01	Bacteria	Chloroflexota	Dehalococcoidia	UBA3495	UBA3495	UBA9611	UBA9611 sp002746355	88.1	3.04	3013157	59.2458	0.869566	3066	220	86097	13696.2	20119	1	1	1	28
Dehal_d02	Bacteria	Chloroflexota	Dehalococcoidia	UBA1151	UBA1328	UBA1328	UBA1328 sp002313245	91.86	0.93	2323510	57.8614	0.873273	2300	178	60373	13053.4	17539	0	2	1	46
Dehal_d03	Bacteria	Chloroflexota	Dehalococcoidia	SAR202	UBA11138	UBA1123	UBA1123 sp002313895	78.85	4.06	3172636	55.7139	0.859483	3434	360	34995	8812.88	10691	1	0	1	35
Dehal_d05	Bacteria	Chloroflexota	Dehalococcoidia	UBA3495	UBA3495	UBA9611	UBA9611 sp002746355	94.07	2.97	3192557	59.1696	0.866648	3167	156	127151	20465.1	32326	1	2	1	41
Dehal_d06	Bacteria	Chloroflexota	Dehalococcoidia	SAR202	UBA11138	UBA1123	UBA1123 sp002313895	90.45	4.95	3431146	55.6741	0.8628	3582	231	75944	14853.4	24311	1	0	0	38
Dehal_d07	Bacteria	Chloroflexota	Dehalococcoidia	UBA3495	UBA3495	UBA11650	UBA11650 sp002401285	89.84	5.86	3370803	57.7505	0.862299	3384	310	86281	10873.6	16986	1	1	0	64
Dehal_d08	Bacteria	Chloroflexota	Dehalococcoidia	UBA1151	UBA1328	UBA1328	UBA1328 sp002313245	89.39	1.18	2318990	57.8382	0.871927	2324	197	62944	11771.5	16878	0	0	1	46
Dehal_d09	Bacteria	Chloroflexota	Dehalococcoidia	SAR202	UBA11138	UBA1123	UBA1123 sp002313895	88.72	6.06	3359910	55.6404	0.857507	3644	415	36254	8096.17	10747	0	0	0	39
Dehal_d10	Bacteria	Chloroflexota	Dehalococcoidia	UBA1151	UBA1328	UBA1328	UBA1328 sp002313245	88.46	1.38	2213830	57.8471	0.870946	2246	218	53354	10155.2	13577	0	1	1	39
Dehal_d11	Bacteria	Chloroflexota	Dehalococcoidia	UBA3495	UBA3495	UBA9611	UBA9611 sp002746355	94.34	3.85	3175514	59.1451	0.866458	3148	151	166576	21029.9	36423	0	1	1	39
Dehal_d12	Bacteria	Chloroflexota	Dehalococcoidia	UBA3495	UBA3495	UBA11650	UBA11650 sp002401285	90.81	4.82	3304497	57.79	0.864146	3349	364	53569	9078.29	12199	1	1	0	60
Dehal_d13	Bacteria	Chloroflexota	Dehalococcoidia	UBA3495	UBA3495	UBA11650	UBA11650 sp002401285	89.91	3.89	3272566	57.6248	0.86215	3355	432	49177	7575.38	9377	1	1	0	63
Dehal_d14	Bacteria	Chloroflexota	Dehalococcoidia	UBA1151	UBA1328	UBA1328	UBA1328 sp002313245	86.03	1.67	2194700	57.8945	0.872898	2254	235	46612	9339.15	12210	0	1	0	43
Dehal_d15	Bacteria	Chloroflexota	Dehalococcoidia	UBA3495	UBA3495	UBA9611	UBA9611 sp002746355	94.67	3.99	3201035	59.1279	0.865876	3169	141	179541	22702.4	32434	1	2	1	43
Dehal_d16	Bacteria	Chloroflexota	Dehalococcoidia	UBA1151	UBA1328	UBA1328	UBA1328 sp002313245	58.76	1.54	1556218	57.8637	0.874397	1734	326	18069	4773.67	5130	0	1	0	22
Dehal_d17	Bacteria	Chloroflexota	Dehalococcoidia	UBA3495	UBA3495	UBA9611	UBA9611 sp002746355	79.57	5.44	2958930	59.0718	0.864409	3152	437	35281	6771.01	8036	1	1	0	32
Dehal_d18	Bacteria	Chloroflexota	Dehalococcoidia	UBA3495	UBA3495	UBA9611	UBA9611 sp002746355	90.59	9.06	3463910	58.9595	0.862765	3512	261	69089	13271.7	23397	1	1	1	42
DG_d01	Bacteria	TA06_A	JAAXHH01	JAAXHH01	JAAXHH01	CAJXCW01	CAJXCW01 sp913051705	66.8	4.88	3775406	51.2419	0.889413	4772	1819	8648	2075.54	2253	0	1	0	17
Gamma_1501	Bacteria	Proteobacteria	Gammaproteobacteria	Pseudomonadales	Moraxellaceae	Psychrobacter	Psychrobacter sp002836505	90.87	2.94	3062356	42.9972	0.839089	2837	592	31169	5172.9	6937	0	0	0	31
Gamma_1502	Bacteria	Proteobacteria	Gammaproteobacteria	Pseudomonadales	Pseudohongiellaceae	UBA9145	UBA9145 sp002694855	96.76	2.47	2944576	46.5342	0.90339	2725	199	80023	14796.9	27959	1	0	0	43
Gamma_1503	Bacteria	Proteobacteria	Gammaproteobacteria	UBA11654	UBA11654	DTSX01	DTSX01 sp012965065	68.35	0.12	1086314	41.4443	0.949166	1080	84	79289	12932.3	18840	1	0	0	24
Gamma_1504	Bacteria	Proteobacteria	Gammaproteobacteria	SAR86	SAR86	AEGEAN-183	AEGEAN-183 sp012965075	79.54	1.84	1158252	37.1517	0.961696	1273	183	23207	6329.25	7743	0	1	0	21
Gamma_1505	Bacteria	Proteobacteria	Gammaproteobacteria	Pseudomonadales	HTCC2089	UBA11889	UBA11889 sp002313255	73.21	1.21	2027409	53.418	0.931235	2177	366	26110	5539.37	5894	0	1	0	15
Gamma_1506	Bacteria	Proteobacteria	Gammaproteobacteria	Pseudomonadales	Pseudohongiellaceae	UBA9145	UBA9145 sp002694855	96.91	0.83	2852465	46.6556	0.902871	2605	137	113035	20820.9	34914	1	0	0	41
Gamma_1507	Bacteria	Proteobacteria	Gammaproteobacteria	SAR86	SAR86	AEGEAN-183	AEGEAN-183 sp012965075	74.23	1.94	962798	36.8341	0.959657	1055	164	29129	5870.72	7034	0	1	0	19
Gamma_1508	Bacteria	Proteobacteria	Gammaproteobacteria	Pseudomonadales	HTCC2089	UBA11889	UBA11889 sp002313255	95.51	0.94	2856947	53.306	0.929741	2779	204	117143	14004.6	24063	0	0	0	27
Gamma_1509	Bacteria	Proteobacteria	Gammaproteobacteria	UBA11654	UBA11654	DTSX01	DTSX01 sp012965065	87.76	0.64	1350704	40.8125	0.946617	1374	126	68990	10719.9	17346	1	0	0	34
Gamma_1510	Bacteria	Proteobacteria	Gammaproteobacteria	SAR86	SAR86	AEGEAN-183	AEGEAN-183 sp012965075	85.82	1.09	1153693	37.091	0.959877	1233	137	46190	8421.12	10956	0	1	0	20
Gamma_1511	Bacteria	Proteobacteria	Gammaproteobacteria	Pseudomonadales	Pseudohongiellaceae	UBA9145	UBA9145 sp002694855	96.42	1.1	2811209	46.6638	0.904015	2574	134	146960	20979.2	37421	1	0	0	36
Gamma_1512	Bacteria	Proteobacteria	Gammaproteobacteria	Pseudomonadales	Pseudohongiellaceae	UBA9145	UBA9145 sp002694855	98.05	0.87	2797372	46.6274	0.904426	2536	123	112972	22742.9	44562	1	0	0	39
Gamma_1513	Bacteria	Proteobacteria	Gammaproteobacteria	Pseudomonadales	HTCC2089	UBA11889	UBA11889 sp002313255	98.87	2.82	2733562	53.3936	0.929995	2725	245	48588	11157.4	16236	0	1	0	31
Gamma_1514	Bacteria	Proteobacteria	Gammaproteobacteria	UBA11654	UBA11654	DTSX01	DTSX01 sp012965065	83.06	0.19	1282649	41.0562	0.947293	1291	117	65434	10962.8	16005	0	1	0	26
Gamma_1515	Bacteria	Proteobacteria	Gammaproteobacteria	SAR86	SAR86	AEGEAN-183	AEGEAN-183 sp012965075	76.5	1.74	949185	36.9766	0.960983	1032	157	53252	6045.76	6889	0	1	0	19
Gamma_1516	Bacteria	Proteobacteria	Gammaproteobacteria	UBA11654	UBA11654	CACPJA01	Unknown	72.18	1.06	1250185	37.0647	0.953027	1234	74	93853	16894.4	33655	0	0	0	23
Gamma_1517	Bacteria	Proteobacteria	Gammaproteobacteria	Pseudomonadales	HTCC2089	UBA11889	UBA11889 sp002313255	97.33	0.88	3126186	53.0153	0.929467	3046	146	170555	21412.2	47687	0	1	0	32
Gamma_1518	Bacteria	Proteobacteria	Gammaproteobacteria	Pseudomonadales	Halomonadaceae	Halomonas	Halomonas aquamarina	63.82	2.49	2132972	56.5003	0.901551	2878	1032	9477	2066.83	2206	0	0	0	3
Gamma_1519	Bacteria	Proteobacteria	Gammaproteobacteria	UBA11654	UBA11654	DTSX01	DTSX01 sp012965065	85.39	0.23	1207110	40.8848	0.951786	1221	121	59429	9976.12	13980	0	0	0	26
Gamma_1520	Bacteria	Proteobacteria	Gammaproteobacteria	Pseudomonadales	Pseudohongiellaceae	UBA9145	UBA9145 sp002694855	96.47	0.17	2823557	46.6056	0.90241	2557	111	136500	25437.5	45144	1	0	0	41
Gamma_1521	Bacteria	Proteobacteria	Gammaproteobacteria	Pseudomonadales	Halomonadaceae	Halomonas	Halomonas aquamarina	75.19	2.36	2653732	56.828	0.905467	3247	948	27939	2799.3	3334	0	0	0	18
Gamma_1522	Bacteria	Proteobacteria	Gammaproteobacteria	Enterobacterales_A	Alteromonadaceae	Alteromonas	Alteromonas naphthalenivorans	63.92	2.57	3134679	43.7427	0.891702	3489	915	29686	3425.88	3847	0	0	0	11
Gamma_1523	Bacteria	Proteobacteria	Gammaproteobacteria	Pseudomonadales	Pseudohongiellaceae	UBA9145	UBA9145 sp002694855	96.63	2.28	2959591	46.6269	0.902507	2739	185	78814	15997.8	31240	1	0	0	40
Gamma_1524	Bacteria	Proteobacteria	Gammaproteobacteria	Pseudomonadales	HTCC2089	UBA11889	UBA11889 sp002313255	96.55	1.39	2804702	53.4017	0.928372	2748	196	76112	14309.7	24260	1	0	0	33
Gamma_1525	Bacteria	Proteobacteria	Gammaproteobacteria	SAR86	SAR86	AEGEAN-183	AEGEAN-183 sp012965075	90.23	1.25	1374030	37.2257	0.959277	1415	101	52246	13604.3	23120	0	1	0	30
Gamma_1526	Bacteria	Proteobacteria	Gammaproteobacteria	UBA11654	UBA11654	CACPJA01	Unknown	83.43	2.93	1514212	37.0144	0.948087	1529	102	94632	14845.2	36118	0	1	0	29
Gamma_1527	Bacteria	Proteobacteria	Gammaproteobacteria	PS1	Thioglobaceae	Pseudothioglobus	Unknown	79.92	5.07	1181603	36.7695	0.948106	1250	133	35104	8884.23	12140	0	0	0	16
Gamma_1528	Bacteria	Proteobacteria	Gammaproteobacteria	UBA11654	UBA11654	DTSX01	DTSX01 sp012965065	92.75	0.11	1356360	41.1486	0.948216	1339	84	88352	16147.1	31747	1	1	0	32
Gamma_1529	Bacteria	Proteobacteria	Gammaproteobacteria	Pseudomonadales	Pseudohongiellaceae	UBA9145	UBA9145 sp002731775	93.56	2.02	3193949	52.5744	0.885429	3035	265	93026	12052.6	19377	0	0	0	34
Gamma_201	Bacteria	Proteobacteria	Gammaproteobacteria	UBA11654	UBA11654	CACPJA01	Unknown	70.08	8.66	1723720	37.6944	0.950506	1806	336	29870	5130.12	5310	1	0	0	22
Gamma_202	Bacteria	Proteobacteria	Gammaproteobacteria	Pseudomonadales	Pseudohongiellaceae	UBA9145	UBA9145 sp012960305	97.38	0.23	3173443	44.4393	0.873321	2801	82	181922	38700.5	69709	0	0	0	32
Gamma_203	Bacteria	Proteobacteria	Gammaproteobacteria	Pseudomonadales	Porticoccaceae	HTCC2207	Unknown	91.34	0.06	2366864	45.618	0.916691	2252	150	159906	15779.1	22641	0	0	0	23
Gamma_204	Bacteria	Proteobacteria	Gammaproteobacteria	Pseudomonadales	HTCC2089	UBA9659	UBA9659 sp018665025	66.13	3.39	2528810	50.5634	0.899178	3251	1252	11667	2019.82	2183	0	0	0	4
Gamma_206	Bacteria	Proteobacteria	Gammaproteobacteria	Pseudomonadales	Pseudohongiellaceae	UBA9145	UBA9145 sp012960305	80.02	6.02	2840881	44.4648	0.880827	2815	457	35512	6216.37	7039	1	0	0	24
Gamma_207	Bacteria	Proteobacteria	Gammaproteobacteria	Arenicellales	UBA868	REDSEA-S09-B13	REDSEA-S09-B13 sp002456995	85.19	5.71	2974572	51.8763	0.915879	2942	267	94966	11140.7	16043	0	0	0	30
Gamma_209	Bacteria	Proteobacteria	Gammaproteobacteria	Arenicellales	UBA868	REDSEA-S09-B13	REDSEA-S09-B13 sp002456995	93.8	3.58	2841892	52.1467	0.918598	2870	286	71860	9936.69	14477	0	0	0	35
Gamma_210	Bacteria	Proteobacteria	Gammaproteobacteria	Pseudomonadales	Alcanivoracaceae	Alcanivorax	Alcanivorax sp000155615	66.44	1.44	2351763	58.813	0.892697	2979	1158	7417	2030.88	2139	0	0	0	7
Gamma_211	Bacteria	Proteobacteria	Gammaproteobacteria	Arenicellales	UBA868	REDSEA-S09-B13	REDSEA-S09-B13 sp002456995	96.34	1.9	2831133	52.0903	0.918569	2779	202	87510	14015.5	25104	0	0	0	41
Gamma_212	Bacteria	Proteobacteria	Gammaproteobacteria	SAR86	SAR86	AEGEAN-183	Unknown	81.18	8.97	1475953	37.4216	0.958904	1622	260	25824	5676.74	6331	1	1	0	28
Gamma_213	Bacteria	Proteobacteria	Gammaproteobacteria	SAR86	SAR86	AEGEAN-183	Unknown	86.64	7.12	1370995	37.0157	0.960959	1447	158	37596	8677.18	13012	1	0	0	26
Gamma_214	Bacteria	Proteobacteria	Gammaproteobacteria	Arenicellales	UBA868	REDSEA-S09-B13	REDSEA-S09-B13 sp002456995	96.56	2.42	3046912	51.9676	0.916	2939	152	144912	20045.5	34244	0	1	0	44
Gamma_215	Bacteria	Proteobacteria	Gammaproteobacteria	Arenicellales	UBA868	REDSEA-S09-B13	REDSEA-S09-B13 sp002456995	98.18	5.02	2834102	51.5523	0.915267	2914	338	44210	8384.92	11658	0	0	0	32
Gamma_216	Bacteria	Proteobacteria	Gammaproteobacteria	UBA11654	UBA11654	CACPJA01	Unknown	85.13	2.34	1470026	37.1883	0.956491	1484	98	194175	15000.3	31020	0	1	0	28
Gamma_217	Bacteria	Proteobacteria	Gammaproteobacteria	Arenicellales	UBA868	REDSEA-S09-B13	REDSEA-S09-B13 sp002456995	98.16	2.22	2943932	52.0205	0.918511	2849	167	88256	17628.3	29816	0	0	0	36
Gamma_218	Bacteria	Proteobacteria	Gammaproteobacteria	Arenicellales	UBA868	UBA868	UBA868 sp018661145	67.45	0.12	1606107	55.3695	0.935996	1666	249	44095	6450.23	7727	0	0	0	17
Gamma_219	Bacteria	Proteobacteria	Gammaproteobacteria	Pseudomonadales	Pseudohongiellaceae	UBA9145	Unknown	96.65	8.6	3528948	43.7214	0.904774	3141	165	175972	21387.6	58277	0	0	0	35
Gamma_220	Bacteria	Proteobacteria	Gammaproteobacteria	SAR86	SAR86	AEGEAN-183	AEGEAN-183 sp022447025	65.6	0.99	1038097	36.8104	0.964431	1134	134	71385	7746.99	10515	0	0	0	17
Gamma_221	Bacteria	Proteobacteria	Gammaproteobacteria	Arenicellales	UBA868	REDSEA-S09-B13	REDSEA-S09-B13 sp002456995	88.9	8.18	2880007	50.8077	0.916123	2993	455	44242	6329.69	7561	0	0	0	29
Gamma_222	Bacteria	Proteobacteria	Gammaproteobacteria	Pseudomonadales	Pseudohongiellaceae	UBA9145	UBA9145 sp002712055	62.38	3.68	2026014	46.417	0.907723	2078	404	21836	5014.89	5384	1	0	0	20
Gamma_223	Bacteria	Proteobacteria	Gammaproteobacteria	Pseudomonadales	Pseudohongiellaceae	UBA9145	UBA9145 sp012960305	97.3	0.36	3256967	44.5353	0.874039	2894	97	206619	33577	72743	0	0	0	34
Gamma_224	Bacteria	Proteobacteria	Gammaproteobacteria	Arenicellales	UBA868	UBA868	UBA868 sp018698075	67.89	0.44	1811946	54.5848	0.919224	1881	272	27767	6661.57	7493	0	0	0	21
Gamma_225	Bacteria	Proteobacteria	Gammaproteobacteria	Pseudomonadales	HTCC2089	UBA9659	UBA9659 sp018665025	95.6	5.51	4150424	50.7321	0.901006	4203	423	52391	9811.88	13022	0	0	0	36
Gamma_226	Bacteria	Proteobacteria	Gammaproteobacteria	Woeseiales	Woeseiaceae	SP4260	Unknown	88.4	3.24	1723255	37.5547	0.940624	1684	178	71896	9681.21	13856	1	1	0	17
Gamma_227	Bacteria	Proteobacteria	Gammaproteobacteria	Pseudomonadales	Porticoccaceae	HTCC2207	HTCC2207 sp002313335	54.6	5.23	1842097	45.7733	0.915337	2235	907	16243	2030.98	2230	0	0	0	5
Gamma_228	Bacteria	Proteobacteria	Gammaproteobacteria	Pseudomonadales	HTCC2089	UBA9659	UBA9659 sp018665025	85.17	2.62	3582349	50.7749	0.903671	3699	579	35253	6187.13	7223	0	0	0	21
Gamma_229	Bacteria	Proteobacteria	Gammaproteobacteria	Pseudomonadales	Pseudohongiellaceae	UBA9145	UBA9145 sp012960305	95.72	4.94	3298502	44.5012	0.874864	2957	131	155003	25179.4	45372	0	0	1	37
Gamma_230	Bacteria	Proteobacteria	Gammaproteobacteria	Pseudomonadales	Porticoccaceae	HTCC2207	Unknown	94.01	0.31	2273035	45.6541	0.917304	2119	114	149040	19938.9	32637	0	0	0	19
Gamma_231	Bacteria	Proteobacteria	Gammaproteobacteria	Arenicellales	UBA868	REDSEA-S09-B13	REDSEA-S09-B13 sp002456995	95.43	3.91	3103512	51.9245	0.915218	3025	215	85831	14434.9	21793	0	0	0	34
Gamma_232	Bacteria	Proteobacteria	Gammaproteobacteria	Pseudomonadales	Pseudohongiellaceae	UBA9145	UBA9145 sp012960305	90.46	0.35	3180708	44.4855	0.874442	2821	78	220492	40778.3	93046	0	0	0	32
Gamma_233	Bacteria	Proteobacteria	Gammaproteobacteria	UBA11654	UBA11654	CACPJA01	Unknown	82.07	3.27	1286514	36.7727	0.950126	1296	63	104628	20420.9	36086	0	1	0	32
Gamma_234	Bacteria	Proteobacteria	Gammaproteobacteria	UBA11654	UBA11654	JABHDX01	Unknown	65.51	2.25	1482615	35.6072	0.95058	1475	109	64190	13602	23437	0	1	0	25
Gamma_235	Bacteria	Proteobacteria	Gammaproteobacteria	Arenicellales	UBA868	UBA868	UBA868 sp018698075	75.79	0.69	2028300	54.5933	0.914866	2119	300	38035	6761	7367	0	0	0	19
Gamma_236	Bacteria	Proteobacteria	Gammaproteobacteria	Woeseiales	Woeseiaceae	SP4260	Unknown	95.72	2.61	1956019	37.5997	0.937465	1866	117	130214	16718.1	28912	2	0	2	31
Gamma_237	Bacteria	Proteobacteria	Gammaproteobacteria	Arenicellales	UBA868	REDSEA-S09-B13	REDSEA-S09-B13 sp002456995	96.33	2.1	2939590	52.0753	0.915677	2883	207	109119	14200.9	22578	0	0	0	38
Gamma_238	Bacteria	Proteobacteria	Gammaproteobacteria	UBA11654	UBA11654	CACPJA01	Unknown	88.22	0.2	1418797	36.898	0.951227	1433	104	79375	13642.3	25873	1	0	0	26
Gamma_239	Bacteria	Proteobacteria	Gammaproteobacteria	UBA11654	UBA11654	CACPJA01	Unknown	75.85	3.32	1223909	36.9322	0.954639	1298	142	51752	8619.08	11532	0	1	0	20
Gamma_240	Bacteria	Proteobacteria	Gammaproteobacteria	Arenicellales	UBA868	REDSEA-S09-B13	REDSEA-S09-B13 sp002456995	98.06	1.83	2866256	52.0681	0.91895	2787	175	98389	16378.6	26614	0	0	0	38
Gamma_501	Bacteria	Proteobacteria	Gammaproteobacteria	Pseudomonadales	Alcanivoracaceae	Alcanivorax	Alcanivorax sp000155615	99.99	0.03	3607949	58.3558	0.887477	3279	49	384737	73631.6	115452	0	1	0	41
Gamma_502	Bacteria	Proteobacteria	Gammaproteobacteria	Enterobacterales_A	Alteromonadaceae	Pseudoalteromonas	Pseudoalteromonas atlantica	100	0.43	4421219	40.7995	0.885968	3923	36	491793	122812	191345	0	0	0	61
Gamma_503	Bacteria	Proteobacteria	Gammaproteobacteria	SAR86	SAR86	CAJJAM01	Unknown	74.8	3.1	1098872	36.1296	0.959649	1165	101	47998	10879.9	16311	1	0	0	15
Gamma_504	Bacteria	Proteobacteria	Gammaproteobacteria	UBA11654	UBA11654	DTSX01	DTSX01 sp012965065	91.32	0.27	1398294	40.7814	0.943977	1393	88	73785	15889.7	26840	0	0	0	36
Gamma_505	Bacteria	Proteobacteria	Gammaproteobacteria	UBA11654	UBA11654	CACPJA01	Unknown	86.57	1.17	1273876	36.8877	0.952881	1298	71	72945	17941.9	36288	0	0	0	24
Gamma_506	Bacteria	Proteobacteria	Gammaproteobacteria	Arenicellales	UBA868	REDSEA-S09-B13	REDSEA-S09-B13 sp002456995	95.63	1.85	3057029	51.9394	0.915678	2992	209	106568	14626.9	25921	0	0	0	41
Gamma_507	Bacteria	Proteobacteria	Gammaproteobacteria	Pseudomonadales	HTCC2089	UBA9659	UBA9659 sp012961165	84.03	0.66	2881586	51.0188	0.915747	3007	483	27857	5966.02	6531	0	0	0	14
Gamma_508	Bacteria	Proteobacteria	Gammaproteobacteria	Pseudomonadales	Pseudohongiellaceae	UBA9145	UBA9145 sp012960305	92.27	0.65	3104688	44.4045	0.872878	2761	84	231538	36960.6	70572	0	0	0	30
Gamma_509	Bacteria	Proteobacteria	Gammaproteobacteria	Pseudomonadales	Alcanivoracaceae	Alcanivorax	Alcanivorax sp000155615	99.99	0.02	3593676	58.4037	0.888124	3281	88	199199	40837.2	65876	0	0	0	39
Gamma_510	Bacteria	Proteobacteria	Gammaproteobacteria	Enterobacterales_A	Alteromonadaceae	Pseudoalteromonas	Pseudoalteromonas atlantica	100	0.39	4417212	40.7983	0.886707	3923	39	386508	113262	191345	1	0	0	52
Gamma_511	Bacteria	Proteobacteria	Gammaproteobacteria	Pseudomonadales	HTCC2089	UBA9659	UBA9659 sp012961165	83	4.89	3539594	50.9197	0.905274	3670	513	34512	6899.79	7985	1	0	0	20
Gamma_512	Bacteria	Proteobacteria	Gammaproteobacteria	Pseudomonadales	Pseudohongiellaceae	UBA9145	UBA9145 sp012960305	84.67	0.97	3157545	44.5498	0.871446	2966	301	63723	10490.2	14571	1	0	0	38
Gamma_513	Bacteria	Proteobacteria	Gammaproteobacteria	Arenicellales	UBA868	REDSEA-S09-B13	REDSEA-S09-B13 sp002456995	92.83	2	2975681	52.0657	0.916241	2903	220	72410	13525.8	21717	1	0	0	31
Gamma_514	Bacteria	Proteobacteria	Gammaproteobacteria	UBA11654	UBA11654	DTSX01	DTSX01 sp012965065	85.51	2.47	1480693	40.9152	0.941556	1481	124	69176	11941.1	17613	0	0	0	26
Gamma_515	Bacteria	Proteobacteria	Gammaproteobacteria	Arenicellales	UBA868	REDSEA-S09-B13	REDSEA-S09-B13 sp002456995	87.79	2.98	2675519	52.1035	0.918376	2669	275	135523	9729.16	14921	1	1	0	32
Gamma_516	Bacteria	Proteobacteria	Gammaproteobacteria	Pseudomonadales	Pseudohongiellaceae	UBA9145	UBA9145 sp002694855	65.66	5.35	2618852	47.5379	0.891644	2750	527	23386	4969.36	5243	0	0	0	19
Gamma_517	Bacteria	Proteobacteria	Gammaproteobacteria	Pseudomonadales	Pseudohongiellaceae	UBA9145	UBA9145 sp012960305	97.66	1.78	3177076	44.4337	0.8734	2845	114	149451	27869.1	58557	0	1	0	34
Gamma_518	Bacteria	Proteobacteria	Gammaproteobacteria	UBA11654	UBA11654	DTSX01	DTSX01 sp012965065	85.01	0.07	1284234	41.0931	0.948448	1290	93	84751	13809	23353	0	0	0	29
Gamma_519	Bacteria	Proteobacteria	Gammaproteobacteria	Pseudomonadales	HTCC2089	UBA9659	UBA9659 sp012961165	71.31	0.12	2064368	51.0023	0.929252	2168	400	27447	5160.92	5550	0	0	0	8
Gamma_520	Bacteria	Proteobacteria	Gammaproteobacteria	UBA11654	UBA11654	CACPJA01	Unknown	87	1.03	1361675	36.9717	0.950287	1385	94	79080	14485.9	26969	0	1	0	29
Gamma_521	Bacteria	Proteobacteria	Gammaproteobacteria	UBA11654	UBA11654	CACPJA01	Unknown	80.34	1.8	1456820	37.03	0.950878	1456	107	87540	13615.1	30211	1	0	0	29
Gamma_522	Bacteria	Proteobacteria	Gammaproteobacteria	Arenicellales	UBA868	REDSEA-S09-B13	REDSEA-S09-B13 sp002456995	82.36	1.73	2915742	52.2941	0.917071	2831	167	233887	17459.5	27872	1	1	0	35
Gamma_523	Bacteria	Proteobacteria	Gammaproteobacteria	Arenicellales	UBA868	REDSEA-S09-B13	REDSEA-S09-B13 sp002456995	95.84	2.14	2860446	52.0644	0.917027	2803	203	87507	14090.9	22001	0	1	0	37
Gamma_524	Bacteria	Proteobacteria	Gammaproteobacteria	Arenicellales	UBA868	REDSEA-S09-B13	REDSEA-S09-B13 sp002456995	96.39	3.84	2996919	51.9991	0.918085	2924	167	98030	17945.6	26696	0	0	0	38
Gamma_525	Bacteria	Proteobacteria	Gammaproteobacteria	SAR86	SAR86	AEGEAN-183	Unknown	92.5	2.43	1493771	37.296	0.958602	1568	150	65377	9958.47	20268	0	0	0	33
Gamma_526	Bacteria	Proteobacteria	Gammaproteobacteria	UBA11654	UBA11654	CACPJA01	Unknown	79.65	0.9	1405955	37.4767	0.954884	1498	202	41727	6960.17	10256	0	1	0	20
Gamma_527	Bacteria	Proteobacteria	Gammaproteobacteria	Pseudomonadales	Pseudohongiellaceae	UBA9145	UBA9145 sp002694855	91.43	5.19	2655772	46.6687	0.907831	2543	298	50427	8911.99	12028	1	0	0	20
Gamma_528	Bacteria	Proteobacteria	Gammaproteobacteria	Pseudomonadales	HTCC2089	UBA11889	UBA11889 sp913030615	74.84	2.53	2186320	53.4244	0.9315	2285	385	24392	5678.75	6376	1	1	0	23
Gamma_529	Bacteria	Proteobacteria	Gammaproteobacteria	Pseudomonadales	Pseudohongiellaceae	UBA9145	UBA9145 sp002694855	86.86	9.93	3414848	46.7423	0.901763	3204	384	54772	8892.83	12238	0	0	0	35
Gamma_530	Bacteria	Proteobacteria	Gammaproteobacteria	SAR86	SAR86	AEGEAN-183	AEGEAN-183 sp012965075	87.92	0	1352297	37.1321	0.961115	1398	126	59451	10732.5	16962	0	0	0	32
Gamma_531	Bacteria	Proteobacteria	Gammaproteobacteria	Arenicellales	UBA868	REDSEA-S09-B13	REDSEA-S09-B13 sp002456995	96.66	1.78	2885854	52.145	0.917859	2793	179	131526	16122.1	27258	0	0	0	41
Gamma_532	Bacteria	Proteobacteria	Gammaproteobacteria	Arenicellales	UBA868	REDSEA-S09-B13	REDSEA-S09-B13 sp002456995	97.32	1.8	2998146	51.9736	0.917082	2894	138	97525	21725.7	38738	0	1	0	43
Gamma_533	Bacteria	Proteobacteria	Gammaproteobacteria	Arenicellales	UBA868	REDSEA-S09-B13	REDSEA-S09-B13 sp002456995	95.49	2.13	2895548	51.9485	0.919403	2835	195	80304	14849	24738	0	0	0	43
Gamma_534	Bacteria	Proteobacteria	Gammaproteobacteria	SAR86	SAR86	AEGEAN-183	Unknown	90.53	0.15	1300243	36.8982	0.961561	1357	107	73764	12151.8	20084	0	0	0	27
Gamma_535	Bacteria	Proteobacteria	Gammaproteobacteria	Pseudomonadales	HTCC2089	UBA11889	UBA11889 sp913030615	67.51	3.59	2018727	53.5396	0.933992	2134	361	38049	5592.04	6008	0	0	0	22
Gamma_536	Bacteria	Proteobacteria	Gammaproteobacteria	Pseudomonadales	HTCC2089	UBA9659	UBA9659 sp012961165	78.76	9.43	3347877	50.8909	0.903661	3584	722	21723	4636.95	5035	0	0	0	23
Gamma_537	Bacteria	Proteobacteria	Gammaproteobacteria	Pseudomonadales	Pseudohongiellaceae	UBA9145	UBA9145 sp012960305	97.05	0.42	3150499	44.4319	0.875223	2807	107	166282	29443.9	60560	0	0	0	32
Gamma_538	Bacteria	Proteobacteria	Gammaproteobacteria	Arenicellales	UBA868	UBA868	UBA868 sp018698075	71.31	1.28	1956819	54.8586	0.913251	2062	298	31250	6566.51	7566	1	0	0	27
Gamma_539	Bacteria	Proteobacteria	Gammaproteobacteria	UBA11654	UBA11654	DTSX01	DTSX01 sp012965065	72.43	0.75	1328930	41.1381	0.945572	1355	113	69548	11760.4	17262	0	0	0	26
Gamma_540	Bacteria	Proteobacteria	Gammaproteobacteria	UBA11654	UBA11654	CACPJA01	Unknown	85.5	0.63	1440745	36.9696	0.947415	1446	96	62518	15007.8	33042	0	0	0	26
Gamma_541	Bacteria	Proteobacteria	Gammaproteobacteria	Arenicellales	UBA868	REDSEA-S09-B13	REDSEA-S09-B13 sp002456995	92.51	3	2923068	52.0601	0.916004	2895	226	64926	12933.9	20921	0	0	0	28
Gamma_542	Bacteria	Proteobacteria	Gammaproteobacteria	Woeseiales	Woeseiaceae	SP4260	Unknown	80.6	3.76	1713641	37.7399	0.937517	1617	96	90148	17850.4	29045	1	1	0	25
Gamma_543	Bacteria	Proteobacteria	Gammaproteobacteria	Pseudomonadales	HTCC2089	UBA9659	UBA9659 sp012961165	64.99	4.87	2327849	50.9905	0.911019	2509	511	21758	4555.48	4687	0	0	0	12
Gamma_544	Bacteria	Proteobacteria	Gammaproteobacteria	Pseudomonadales	Pseudohongiellaceae	UBA9145	UBA9145 sp012960305	96.16	1.19	3077224	44.3622	0.873342	2805	178	86668	17287.8	27962	0	0	0	28
Gamma_545	Bacteria	Proteobacteria	Gammaproteobacteria	Arenicellales	UBA868	REDSEA-S09-B13	REDSEA-S09-B13 sp002456995	96.18	4.12	3159722	51.898	0.914937	3162	316	67675	9999.12	14357	0	1	0	43
Gamma_546	Bacteria	Proteobacteria	Gammaproteobacteria	UBA11654	UBA11654	DTSX01	DTSX01 sp012965065	85.07	2.5	1461213	40.8482	0.941264	1461	109	101535	13405.6	19196	1	1	0	35
Gamma_547	Bacteria	Proteobacteria	Gammaproteobacteria	UBA11654	UBA11654	CACPJA01	Unknown	84.45	3.25	1399816	36.9751	0.948943	1404	92	92941	15215.4	29651	0	0	0	27
Gamma_548	Bacteria	Proteobacteria	Gammaproteobacteria	Pseudomonadales	Pseudohongiellaceae	UBA9145	UBA9145 sp012960305	90.9	2.37	3085426	44.3988	0.873372	2914	303	43904	10182.9	13219	0	0	0	30
Gamma_549	Bacteria	Proteobacteria	Gammaproteobacteria	UBA11654	UBA11654	DTSX01	DTSX01 sp012965065	88.48	0.09	1433393	40.8792	0.943304	1420	92	99478	15580.4	26736	1	0	0	38
Gamma_550	Bacteria	Proteobacteria	Gammaproteobacteria	Arenicellales	UBA868	REDSEA-S09-B13	REDSEA-S09-B13 sp002456995	80.8	7.28	2578497	51.9074	0.916676	2689	435	29265	5927.58	6905	0	0	0	30
Gamma_551	Bacteria	Proteobacteria	Gammaproteobacteria	Pseudomonadales	Pseudohongiellaceae	UBA9145	UBA9145 sp012960305	98.37	1.6	3271923	44.5804	0.875527	2956	171	99868	19134.1	32766	0	0	0	27
Gamma_552	Bacteria	Proteobacteria	Gammaproteobacteria	Pseudomonadales	HTCC2089	UBA9659	UBA9659 sp018665025	66.89	2.35	2847290	50.7189	0.902227	3124	605	19507	4706.26	4988	1	0	0	18
Gamma_553	Bacteria	Proteobacteria	Gammaproteobacteria	UBA11654	UBA11654	CACPJA01	Unknown	77.52	5.57	1424473	37.0872	0.951592	1432	103	106662	13829.8	30480	0	0	0	27
Gamma_554	Bacteria	Proteobacteria	Gammaproteobacteria	PS1	Thioglobaceae	Pseudothioglobus	Pseudothioglobus sp002698045	63.78	0.29	888651	36.4155	0.946482	978	140	23296	6347.51	7511	0	1	0	11
Gamma_556	Bacteria	Proteobacteria	Gammaproteobacteria	Arenicellales	UBA868	UBA868	UBA868 sp018698075	62.41	0.44	1855086	54.634	0.920731	1893	259	34303	7162.49	8837	0	0	0	13
Gamma_557	Bacteria	Proteobacteria	Gammaproteobacteria	SAR86	SAR86	AEGEAN-183	AEGEAN-183 sp012965075	89.84	0.01	1374363	37.1214	0.95818	1450	124	43604	11083.6	14979	0	1	0	29
Gamma_558	Bacteria	Proteobacteria	Gammaproteobacteria	Arenicellales	UBA868	REDSEA-S09-B13	REDSEA-S09-B13 sp002456995	83.08	1.75	2605658	52.2001	0.920833	2534	156	87533	16702.9	26952	0	0	0	31
Gamma_559	Bacteria	Proteobacteria	Gammaproteobacteria	Pseudomonadales	Pseudohongiellaceae	UBA9145	UBA9145 sp002694855	76.1	1.01	2257501	47.1782	0.904034	2098	172	66230	13125	21319	0	0	0	26
Gamma_560	Bacteria	Proteobacteria	Gammaproteobacteria	Arenicellales	UBA868	UBA11791	UBA11791 sp012960345	56.03	1.66	1918933	53.4328	0.925248	2055	360	17814	5330.37	5802	0	0	0	20
Gamma_561	Bacteria	Proteobacteria	Gammaproteobacteria	Arenicellales	UBA868	UBA868	UBA868 sp018698075	69.15	0.47	1831594	54.866	0.91977	1888	269	29833	6808.9	7967	0	0	0	12
Gamma_562	Bacteria	Proteobacteria	Gammaproteobacteria	UBA11654	UBA11654	CACPJA01	Unknown	75.6	0.05	1357252	36.9814	0.952295	1347	54	141383	25134.3	53327	0	1	0	27
Gamma_d01	Bacteria	Proteobacteria	Gammaproteobacteria	Arenicellales	UBA868	UBA11791	Unknown	58.23	2.62	2351256	53.0793	0.908143	2564	571	23306	4117.79	4382	1	0	0	13
Gamma_d02	Bacteria	Proteobacteria	Gammaproteobacteria	Pseudomonadales	HTCC2089	UBA9659	UBA9659 sp012961165	85.06	2.53	3649551	50.9492	0.905595	3846	595	28930	6133.7	7640	1	0	0	24
Gamma_d03	Bacteria	Proteobacteria	Gammaproteobacteria	SAR86	SAR86	AEGEAN-183	AEGEAN-183 sp012965075	87.24	0.01	1388372	37.23	0.957156	1442	127	54753	10932.1	17632	0	0	0	27
Gamma_d04	Bacteria	Proteobacteria	Gammaproteobacteria	Arenicellales	UBA868	REDSEA-S09-B13	REDSEA-S09-B13 sp003447825	93.58	2.55	3197099	53.2777	0.908088	3135	192	85403	16651.6	28505	1	0	0	47
Gamma_d05	Bacteria	Proteobacteria	Gammaproteobacteria	PS1	Thioglobaceae	Pseudothioglobus	Unknown	95.87	0.23	1393050	36.7023	0.945045	1438	98	79051	14214.8	22422	0	0	0	21
Gamma_d06	Bacteria	Proteobacteria	Gammaproteobacteria	PS1	Thioglobaceae	DUCF01	DUCF01 sp913054335	97.12	0.21	1645184	41.94	0.913703	1656	101	87555	16289	25231	0	0	0	24
Gamma_d07	Bacteria	Proteobacteria	Gammaproteobacteria	UBA11654	UBA11654	CACPJA01	Unknown	60.45	1.62	1273420	37.1606	0.952565	1357	206	33772	6181.65	7430	0	0	0	16
Gamma_d08	Bacteria	Proteobacteria	Gammaproteobacteria	UBA11654	UBA11654	DTSX01	DTSX01 sp012965065	76.75	0.03	1117324	41.1092	0.942732	1103	51	87337	21908.3	36436	1	1	1	31
Gamma_d09	Bacteria	Proteobacteria	Gammaproteobacteria	Pseudomonadales	Moraxellaceae	Psychrobacter	Psychrobacter sp002836505	89.98	2.18	2965731	43.066	0.83901	2917	804	24765	3688.72	4692	0	0	0	22
Gamma_d10	Bacteria	Proteobacteria	Gammaproteobacteria	Arenicellales	UBA868	UBA11791	UBA11791 sp002714255	60.23	6.95	2438686	53.1258	0.912926	3181	1240	11157	1966.68	2119	0	0	0	5
Gamma_d11	Bacteria	Proteobacteria	Gammaproteobacteria	UBA11654	UBA11654	DTSX01	DTSX01 sp012965065	93.45	0.12	1398243	40.8944	0.94675	1372	67	143474	20869.3	39665	1	0	1	33
Gamma_d12	Bacteria	Proteobacteria	Gammaproteobacteria	Arenicellales	UBA868	REDSEA-S09-B13	REDSEA-S09-B13 sp003447825	95.92	2.81	3260591	53.3867	0.90779	3171	145	172199	22486.8	39777	1	0	0	47
Gamma_d13	Bacteria	Proteobacteria	Gammaproteobacteria	Pseudomonadales	Alcanivoracaceae	Alcanivorax	Alcanivorax sp002726155	71.37	2.21	2501506	58.5538	0.897622	3100	1086	11481	2303.41	2546	0	0	0	6
Gamma_d14	Bacteria	Proteobacteria	Gammaproteobacteria	PS1	Thioglobaceae	DUCF01	DUCF01 sp913054335	91.69	1.08	1580896	41.9126	0.914192	1599	111	72459	14242.3	22643	0	1	0	22
Gamma_d15	Bacteria	Proteobacteria	Gammaproteobacteria	UBA11654	UBA11654	DTSX01	DTSX01 sp012965065	88.05	0.04	1333107	40.8902	0.944013	1321	88	77199	15148.9	19527	1	1	1	33
Gamma_d16	Bacteria	Proteobacteria	Gammaproteobacteria	SAR86	SAR86	AEGEAN-183	AEGEAN-183 sp012965075	86.21	0.73	1255313	37.1193	0.958539	1311	118	50444	10638.2	15589	0	1	0	26
Gamma_d17	Bacteria	Proteobacteria	Gammaproteobacteria	Arenicellales	UBA868	REDSEA-S09-B13	REDSEA-S09-B13 sp003447825	81.98	1.97	2992932	53.5969	0.911994	2887	112	108209	26722.6	42910	0	0	0	41
Gamma_d18	Bacteria	Proteobacteria	Gammaproteobacteria	Arenicellales	UBA868	UBA11791	UBA11791 sp002714255	65.44	2.15	2000465	53.8377	0.925166	2175	383	21884	5223.15	5674	0	0	0	21
Gamma_d19	Bacteria	Proteobacteria	Gammaproteobacteria	Pseudomonadales	Oleiphilaceae	Marinobacter	Marinobacter salarius	90.23	2.05	3601753	57.6841	0.921733	3713	595	30101	6053.37	7848	0	0	0	30
Gamma_d20	Bacteria	Proteobacteria	Gammaproteobacteria	PS1	Thioglobaceae	Pseudothioglobus	Unknown	86.89	2.55	1486790	36.8833	0.938949	1559	182	59820	8169.18	10213	0	0	0	20
Gamma_d21	Bacteria	Proteobacteria	Gammaproteobacteria	PS1	Thioglobaceae	DUCF01	DUCF01 sp913054335	86.93	1.71	1607912	42.0831	0.915133	1609	97	76571	16576.4	28244	1	1	0	22
Gamma_d22	Bacteria	Proteobacteria	Gammaproteobacteria	UBA11654	UBA11654	DTSX01	DTSX01 sp012965065	86.28	0.46	1306003	40.981	0.944496	1326	132	38457	9893.96	13661	0	0	0	32
Gamma_d23	Bacteria	Proteobacteria	Gammaproteobacteria	Arenicellales	UBA868	REDSEA-S09-B13	REDSEA-S09-B13 sp003447825	94.49	2.55	3106743	53.2864	0.908893	3018	142	118255	21878.5	47534	0	1	0	41
Gamma_d24	Bacteria	Proteobacteria	Gammaproteobacteria	Arenicellales	UBA868	UBA11791	UBA11791 sp002714255	55.86	1.95	1639962	54.0338	0.92531	1805	345	18256	4753.51	4768	0	0	0	10
Gamma_d25	Bacteria	Proteobacteria	Gammaproteobacteria	Pseudomonadales	Pseudohongiellaceae	UBA9145	UBA9145 sp002731775	98.75	4.91	3833089	52.3558	0.888706	3514	265	133495	14464.5	30847	0	0	0	39
Gamma_d26	Bacteria	Proteobacteria	Gammaproteobacteria	Pseudomonadales	Oleiphilaceae	Marinobacter	Marinobacter salarius	88.18	1.19	3752527	57.5865	0.920759	3817	539	40940	6962.02	9996	0	0	0	32
Gamma_d27	Bacteria	Proteobacteria	Gammaproteobacteria	SAR86	SAR86	AEGEAN-183	AEGEAN-183 sp012965075	88.56	0.09	1358843	37.2658	0.957632	1429	118	52279	11515.6	18337	0	0	0	29
Gamma_d28	Bacteria	Proteobacteria	Gammaproteobacteria	UBA11654	UBA11654	DTSX01	DTSX01 sp012965065	89.1	0.97	1370225	40.8577	0.942436	1345	83	89553	16508.7	26789	1	1	1	35
Gamma_d29	Bacteria	Proteobacteria	Gammaproteobacteria	PS1	Thioglobaceae	Pseudothioglobus	Unknown	93.13	1.52	1369352	36.717	0.941332	1432	103	68315	13294.7	21708	0	0	0	29
Gamma_d30	Bacteria	Proteobacteria	Gammaproteobacteria	PS1	Thioglobaceae	DUCF01	DUCF01 sp913054335	91.1	0.38	1651571	41.9152	0.913987	1670	119	77275	13878.7	20634	0	0	0	20
Gemma_1501	Bacteria	Gemmatimonadota	Gemmatimonadetes	Longimicrobiales	UBA6960	UBA1138	UBA1138 sp002313925	74.15	6.12	2297309	52.926	0.900848	2948	1327	13278	1731.2	1738	0	1	1	3
Gemma_1502	Bacteria	Gemmatimonadota	Gemmatimonadetes	Longimicrobiales	UBA6960	UBA1138	UBA1138 sp002313925	91.25	1.61	2270691	52.9506	0.92779	2392	626	19240	3627.3	4531	1	0	0	18
Gemma_1504	Bacteria	Gemmatimonadota	Gemmatimonadetes	Longimicrobiales	UBA6960	UBA1138	UBA1138 sp002313925	67.47	1.61	1404959	52.9191	0.932801	1411	279	21664	5035.7	5326	0	0	0	21
Gemma_1505	Bacteria	Gemmatimonadota	Gemmatimonadetes	Longimicrobiales	UBA6960	UBA1138	UBA1138 sp003447875	82.29	4.02	2989322	63.9759	0.925739	3212	595	20677	5024.07	5522	0	1	0	14
Gemma_1506	Bacteria	Gemmatimonadota	Gemmatimonadetes	Longimicrobiales	UBA6960	UBA1138	UBA1138 sp002313925	92.31	3.14	2217561	52.9369	0.89969	2302	634	22082	3497.73	4296	1	2	12	25
Gemma_1507	Bacteria	Gemmatimonadota	Gemmatimonadetes	Longimicrobiales	UBA6960	UBA1138	UBA1138 sp003447875	83.29	9.49	4018955	64.4146	0.931837	4732	1434	21959	2802.62	4364	0	0	0	10
Gemma_1508	Bacteria	Gemmatimonadota	Gemmatimonadetes	Longimicrobiales	UBA6960	UBA1138	UBA1138 sp003447875	86.94	4.22	3223321	64.1512	0.926941	3309	363	38339	8879.67	11073	0	0	0	20
Gemma_1509	Bacteria	Gemmatimonadota	Gemmatimonadetes	Longimicrobiales	UBA6960	UBA1138	UBA1138 sp002313925	80.52	0.36	1604184	52.9277	0.935479	1538	226	32015	7098.16	7984	0	0	0	10
Gemma_1510	Bacteria	Gemmatimonadota	Gemmatimonadetes	Longimicrobiales	UBA6960	UBA822	UBA822 sp002731735	80.24	2.67	2538439	61.9768	0.916812	2570	438	22834	5795.52	6463	0	0	0	22
Gemma_1511	Bacteria	Gemmatimonadota	Gemmatimonadetes	Longimicrobiales	UBA6960	UBA1138	UBA1138 sp002313925	84.55	1.46	1909686	52.9247	0.931209	1847	253	34233	7548.17	9639	0	1	0	15
Gemma_1512	Bacteria	Gemmatimonadota	Gemmatimonadetes	Longimicrobiales	UBA6960	UBA1138	UBA1138 sp003447875	64.31	5.02	2702910	63.8555	0.924104	3688	1511	6677	1788.82	1822	0	0	0	1
Gemma_202	Bacteria	Gemmatimonadota	Gemmatimonadetes	Longimicrobiales	UBA6960	UBA1138	UBA1138 sp002313925	95.6	0.78	2463417	52.7682	0.93059	2200	106	117540	23239.8	43147	1	1	0	41
Gemma_203	Bacteria	Gemmatimonadota	Gemmatimonadetes	Longimicrobiales	UBA6960	UBA1138	UBA1138 sp002313925	55.56	3.89	1543979	52.698	0.931999	1566	309	18717	4996.7	5303	0	0	0	23
Gemma_204	Bacteria	Gemmatimonadota	Gemmatimonadetes	Longimicrobiales	UBA6960	UBA1138	Unknown	57.47	0.23	1597439	52.02	0.930629	1599	304	20352	5254.73	5633	0	0	0	13
Gemma_205	Bacteria	Gemmatimonadota	Gemmatimonadetes	Longimicrobiales	UBA6960	UBA1138	UBA1138 sp002313925	71	1.24	1742657	52.6407	0.932371	1710	281	35253	6201.63	6744	0	0	0	18
Gemma_501	Bacteria	Gemmatimonadota	Gemmatimonadetes	Longimicrobiales	UBA6960	UBA1138	UBA1138 sp002313925	59.44	3.86	2431409	52.2966	0.892388	3051	1394	6629	1744.2	1765	5	2	5	7
Gemma_502	Bacteria	Gemmatimonadota	Gemmatimonadetes	Longimicrobiales	UBA6960	UBA1138	UBA1138 sp002313925	87.55	1.19	2315842	52.765	0.928939	2206	254	60032	9117.49	11741	1	1	1	24
Gemma_503	Bacteria	Gemmatimonadota	Gemmatimonadetes	Longimicrobiales	UBA6960	UBA1138	UBA1138 sp002313925	94.14	0.95	2570567	52.9106	0.929865	2364	211	83943	12182.8	25208	1	0	1	38
Gemma_504	Bacteria	Gemmatimonadota	Gemmatimonadetes	Longimicrobiales	UBA6960	UBA1138	UBA1138 sp002313925	94.7	0.65	2335270	52.7409	0.930052	2127	148	52387	15778.9	23402	1	1	1	44
Gemma_505	Bacteria	Gemmatimonadota	Gemmatimonadetes	Longimicrobiales	UBA6960	GCA-2718595	Unknown	66.66	1.24	1538830	45.7286	0.926703	1726	492	15683	3127.7	3569	1	0	0	10
Gemma_506	Bacteria	Gemmatimonadota	Gemmatimonadetes	Longimicrobiales	UBA6960	UBA1138	UBA1138 sp002313925	95.61	0.83	2454329	52.8211	0.930373	2220	127	92813	19325.4	35375	1	1	1	45
Gemma_d01	Bacteria	Gemmatimonadota	Gemmatimonadetes	Longimicrobiales	UBA6960	UBA1138	UBA1138 sp003447875	62.26	1.76	3006789	63.8424	0.921026	3516	887	30733	3389.84	3801	0	0	0	7
Gemma_d02	Bacteria	Gemmatimonadota	Gemmatimonadetes	Longimicrobiales	UBA6960	UBA1138	UBA1138 sp003447875	62.8	1.97	2800438	63.8443	0.917806	3546	1098	11735	2550.49	2885	0	0	0	7
Gemma_d03	Bacteria	Gemmatimonadota	Gemmatimonadetes	Longimicrobiales	UBA6960	UBA1138	Unknown	73.48	1.97	2889851	64.4316	0.920338	3185	612	19510	4721.98	5045	0	0	0	15
Gemma_d04	Bacteria	Gemmatimonadota	Gemmatimonadetes	Longimicrobiales	UBA6960	UBA1138	UBA1138 sp003447875	96.24	2	3972089	63.9957	0.922531	3864	188	172269	21128.1	36214	0	0	0	28
Gemma_d05	Bacteria	Gemmatimonadota	Gemmatimonadetes	Longimicrobiales	UBA6960	UBA1138	UBA1138 sp003447875	95.27	2.14	3923662	64.0187	0.92199	3865	239	108128	16417	24005	1	0	0	27
Gemma_d06	Bacteria	Gemmatimonadota	Gemmatimonadetes	Longimicrobiales	UBA6960	UBA1138	UBA1138 sp003447875	89.24	3.4	3730082	64.0139	0.923647	3800	394	62065	9467.21	13424	1	0	0	26
Lates_d01	Bacteria	Latescibacterota	JAAXHH01	JAAXHH01	JAAXHH01	CAJXCW01	CAJXCW01 sp913051705	82.88	6.3	4355941	51.049	0.884471	5179	1588	12317	2743.04	3102	1	1	0	22
Lenti_201	Bacteria	Verrucomicrobiota	Lentisphaeria	JABSQK01	CAJWLW01	CAJWLW01	Unknown	96.55	4.49	4576058	57.8726	0.903108	3973	516	54714	8868.33	12444	0	0	0	41
Marin_1501	Bacteria	Marinisomatota	Marinisomatia	SCGC-AAA003-L08	D37C17	D37C17	D37C17 sp012964845	75.37	3.83	1040279	37.7653	0.947339	1114	196	19600	5307.55	5818	0	0	0	15
Marin_1502	Bacteria	Marinisomatota	Marinisomatia	Marinisomatales	TCS55	TCS55	TCS55 sp002715035	88.59	2.35	1625852	40.4435	0.95601	1593	152	66505	10696.4	15512	1	1	0	27
Marin_1503	Bacteria	Marinisomatota	Marinisomatia	SCGC-AAA003-L08	D37C17	D37C17	D37C17 sp012964845	65.95	3.87	891585	37.505	0.948034	960	170	23947	5244.62	5408	1	0	0	9
Marin_1504	Bacteria	Marinisomatota	Marinisomatia	Marinisomatales	UBA1611	GCA-2722105	GCA-2722105 sp913045415	64.48	5.6	1442040	38.8697	0.953533	1434	269	23010	5360.74	5954	0	0	0	19
Marin_1505	Bacteria	Marinisomatota	Marinisomatia	Marinisomatales	TCS55	TCS55	TCS55 sp002715035	84.81	1.37	1370601	40.6168	0.956116	1380	168	32891	8158.34	10673	0	0	0	18
Marin_1506	Bacteria	Marinisomatota	Marinisomatia	Marinisomatales	TCS55	TCS55	TCS55 sp002715035	88.63	1.32	1537217	40.4027	0.954269	1537	162	43855	9488.99	13026	1	0	1	30
Marin_1507	Bacteria	Marinisomatota	Marinisomatia	SCGC-AAA003-L08	D37C17	D37C17	D37C17 sp012964845	52.79	0.02	720936	37.6416	0.951403	763	126	30236	5721.71	6728	0	0	0	6
Marin_1508	Bacteria	Marinisomatota	Marinisomatia	Marinisomatales	TCS55	TCS55	TCS55 sp002715035	86.57	1.88	1482486	40.3416	0.954939	1477	174	43895	8520.03	12735	1	1	0	23
Marin_1509	Bacteria	Marinisomatota	Marinisomatia	Marinisomatales	TCS55	TCS55	TCS55 sp002715035	78.33	8.96	1529782	40.3948	0.954799	1547	235	33813	6509.71	8132	1	0	0	17
Marin_1510	Bacteria	Marinisomatota	Marinisomatia	SCGC-AAA003-L08	D37C17	D37C17	D37C17 sp012964845	68.75	2.02	926890	37.8356	0.950707	1003	159	28053	5829.5	6245	0	0	0	14
Marin_1511	Bacteria	Marinisomatota	Marinisomatia	Marinisomatales	TCS55	TCS55	TCS55 sp002715035	79.91	1.3	1309577	40.592	0.957459	1331	182	30341	7195.48	10300	1	0	1	18
Marin_201	Bacteria	Marinisomatota	Marinisomatia	Marinisomatales	TCS55	TCS55	TCS55 sp002715035	67.35	1.3	1372966	40.7939	0.949237	1320	89	70378	15426.6	21772	1	1	1	22
Marin_202	Bacteria	Marinisomatota	Marinisomatia	Marinisomatales	UBA1611	GCA-2722105	GCA-2722105 sp913045415	67.06	6.29	1317006	39.5575	0.953709	1491	482	15490	2732.38	2969	0	0	0	10
Marin_203	Bacteria	Marinisomatota	Marinisomatia	Marinisomatales	TCS55	TCS55	TCS55 sp002715035	83.56	8.31	1695611	40.2226	0.952128	1697	203	41784	8352.76	11137	1	0	0	29
Marin_205	Bacteria	Marinisomatota	Marinisomatia	Marinisomatales	UBA1611	GCA-2722105	GCA-2722105 sp913045415	67.23	3.48	1468414	38.9591	0.95173	1439	265	20803	5541.18	6240	0	1	0	31
Marin_206	Bacteria	Marinisomatota	Marinisomatia	Marinisomatales	TCS55	TCS55	TCS55 sp002715035	84.6	0.64	1572377	40.3818	0.953037	1543	102	95744	15415.5	23551	1	0	0	27
Marin_207	Bacteria	Marinisomatota	Marinisomatia	Marinisomatales	TCS55	TCS55	TCS55 sp002715035	91.2	0.94	1693537	40.3462	0.949872	1641	124	74342	13657.6	19261	1	0	1	35
Marin_208	Bacteria	Marinisomatota	Marinisomatia	Marinisomatales	TCS55	TCS55	TCS55 sp002715035	79.42	3.83	1538691	40.5736	0.952779	1476	142	48685	10835.9	14839	0	1	0	32
Marin_501	Bacteria	Marinisomatota	Marinisomatia	Marinisomatales	TCS55	TCS55	TCS55 sp002715035	93.37	1.56	1721709	40.1183	0.952023	1653	109	85300	15795.5	22369	1	0	1	37
Marin_502	Bacteria	Marinisomatota	Marinisomatia	Marinisomatales	TCS55	TCS55	TCS55 sp002715035	92.02	3.66	1732460	40.2277	0.951498	1676	121	80084	14317.9	20000	1	0	1	35
Marin_503	Bacteria	Marinisomatota	Marinisomatia	Marinisomatales	UBA1611	GCA-2722105	GCA-2722105 sp913045415	69.32	2.12	1389201	39.2006	0.954863	1339	229	22238	6066.38	6438	0	0	0	15
Marin_504	Bacteria	Marinisomatota	Marinisomatia	Marinisomatales	TCS55	TCS55	TCS55 sp002715035	91.54	0.54	1628858	40.2625	0.952073	1583	130	68361	12529.7	18994	1	1	1	33
Marin_505	Bacteria	Marinisomatota	Marinisomatia	Marinisomatales	TCS55	TCS55	TCS55 sp002715035	91.62	1.45	1682666	40.2836	0.951119	1613	121	59047	13906.3	20997	1	0	1	35
Marin_506	Bacteria	Marinisomatota	Marinisomatia	Marinisomatales	TCS55	TCS55	TCS55 sp002715035	92.47	7.32	1955141	40.3896	0.949438	1899	192	68870	10183	14983	1	1	0	34
Marin_507	Bacteria	Marinisomatota	Marinisomatia	Marinisomatales	TCS55	TCS55	TCS55 sp002715035	82.32	2.36	1439380	40.4853	0.951723	1421	183	37696	7865.46	10017	1	0	0	19
Marin_508	Bacteria	Marinisomatota	Marinisomatia	Marinisomatales	TCS55	TCS55	TCS55 sp002715035	88.71	0.57	1721382	40.1791	0.949631	1649	106	87959	16239.5	31146	1	1	0	38
Marin_509	Bacteria	Marinisomatota	Marinisomatia	Marinisomatales	TCS55	TCS55	TCS55 sp002715035	89.22	0.66	1760466	40.2062	0.949981	1695	136	70869	12944.6	18793	1	0	1	29
Marin_510	Bacteria	Marinisomatota	Marinisomatia	Marinisomatales	TCS55	TCS55	TCS55 sp002716525	76.59	5.84	1527393	39.0395	0.960086	1495	163	51006	9370.51	13048	1	0	0	20
Marin_511	Bacteria	Marinisomatota	Marinisomatia	Marinisomatales	TCS55	TCS55	TCS55 sp002715035	90.38	0.93	1646523	40.1988	0.949257	1606	119	72990	13836.3	18844	1	0	1	37
Marin_512	Bacteria	Marinisomatota	Marinisomatia	Marinisomatales	TCS55	TCS55	TCS55 sp002715035	84.08	0.39	1575892	40.3715	0.951327	1515	99	103679	15918.1	21386	1	0	1	29
Marin_513	Bacteria	Marinisomatota	Marinisomatia	Marinisomatales	TCS55	TCS55	TCS55 sp002715035	89.87	0.85	1643584	40.2557	0.951615	1615	134	64958	12265.6	16053	1	0	1	37
Marin_514	Bacteria	Marinisomatota	Marinisomatia	Marinisomatales	TCS55	TCS55	TCS55 sp002715035	89.46	0.94	1748015	40.2277	0.951765	1681	113	70690	15469.2	21338	1	0	0	40
Marin_d01	Bacteria	Marinisomatota	Marinisomatia	Marinisomatales	TCS55	TCS55	TCS55 sp002715035	90.55	1.6	1675530	40.5136	0.952233	1625	120	82116	13962.8	21976	1	0	0	28
Marin_d02	Bacteria	Marinisomatota	Marinisomatia	Marinisomatales	UBA8229	UBA8229	UBA8229 sp003535775	67.56	8.31	1528819	39.8135	0.936774	1485	295	24887	5182.44	5541	1	0	0	24
Marin_d03	Bacteria	Marinisomatota	Marinisomatia	SCGC-AAA003-L08	D37C17	D37C17	D37C17 sp012964845	62.24	0.91	787394	38.1192	0.943802	880	158	16985	4983.51	5017	0	0	0	11
Marin_d04	Bacteria	Marinisomatota	Marinisomatia	Marinisomatales	TCS55	UBA2126	UBA2126 sp004124385	87.97	2.82	1756674	37.9791	0.946594	1713	125	95764	14053.4	23473	1	1	1	31
Marin_d05	Bacteria	Marinisomatota	Marinisomatia	Marinisomatales	TCS55	TCS55	TCS55 sp002715035	91.75	2.39	1819418	40.4577	0.948863	1730	105	137872	17327.8	33209	1	1	1	36
Marin_d06	Bacteria	Marinisomatota	Marinisomatia	Marinisomatales	TCS55	TCS55	TCS55 sp002715035	94.93	4.01	1861906	40.4045	0.947955	1788	101	137929	18434.7	34841	1	1	1	37
Marin_d07	Bacteria	Marinisomatota	Marinisomatia	Marinisomatales	TCS55	UBA2126	UBA2126 sp004124385	89.59	2.61	1736223	37.6567	0.946416	1692	119	106072	14590.1	24821	1	1	1	39
Marin_d08	Bacteria	Marinisomatota	Marinisomatia	SCGC-AAA003-L08	D37C17	D37C17	D37C17 sp012964845	77.37	0.45	1124166	38.0083	0.943381	1182	177	30196	6351.22	7569	1	0	0	17
Marin_d09	Bacteria	Marinisomatota	Marinisomatia	Marinisomatales	TCS55	TCS55	TCS55 sp002715035	90.97	1.54	1637832	40.5085	0.953468	1574	116	108948	14119.2	24724	0	0	0	27
Marin_d10	Bacteria	Marinisomatota	Marinisomatia	Marinisomatales	TCS55	UBA2126	UBA2126 sp004124385	75.26	7.42	1828471	38.094	0.948372	1860	251	34946	7284.75	8981	0	1	0	25
Myxoc_201	Bacteria	Myxococcota	UBA9160	UBA9160	CAJXIC01		Unknown	54.08	1.63	2818213	59.4453	0.919297	2861	683	18593	4126.23	4631	1	1	0	14
Nitros_201	Bacteria	Nitrospinota	Nitrospinia	Nitrospinales	Nitrospinaceae	UBA8687	UBA8687 sp022450865	86.08	1.5	1651525	39.9401	0.903347	1707	182	66349	9074.31	11909	0	0	0	23
Nitros_202	Bacteria	Nitrospinota	Nitrospinia	Nitrospinales	Nitrospinaceae	UBA8687	UBA8687 sp002697825	55.75	0.59	1271947	38.8182	0.905886	1392	278	18009	4575.35	4763	0	0	0	11
Nitros_203	Bacteria	Nitrospinota	Nitrospinia	Nitrospinales	Nitrospinaceae	UBA8687	UBA8687 sp022450865	92.03	0.87	1722885	39.8109	0.901834	1773	204	47749	8445.51	11799	1	0	0	25
Nitros_204	Bacteria	Nitrospinota	Nitrospinia	Nitrospinales	Nitrospinaceae	Nitromaritima	Unknown	61.36	2.35	1303986	37.4493	0.897197	1390	267	27957	4883.84	4971	0	0	0	19
Nitros_205	Bacteria	Nitrospinota	Nitrospinia	Nitrospinales	Nitrospinaceae	LS-NOB	LS-NOB sp003545625	71	2.5	1840031	46.7807	0.898017	2208	693	9353	2655.17	2917	0	0	0	13
Nitros_501	Bacteria	Nitrospinota	Nitrospinia	Nitrospinales	Nitrospinaceae	LS-NOB	LS-NOB sp003545625	84.58	1.26	2197129	46.5871	0.892918	2349	317	24430	6931.01	8495	0	0	0	19
Nitros_502	Bacteria	Nitrospinota	Nitrospinia	Nitrospinales	Nitrospinaceae	LS-NOB	LS-NOB sp003545625	89.78	1.16	2231452	46.7697	0.893011	2476	468	24292	4768.06	6268	1	0	0	24
Nitros_503	Bacteria	Nitrospinota	Nitrospinia	Nitrospinales	Nitrospinaceae	LS-NOB	LS-NOB sp003545625	79.87	0.84	1971268	46.6828	0.89373	2134	351	21031	5616.15	6140	1	0	0	19
Nitros_504	Bacteria	Nitrospinota	Nitrospinia	Nitrospinales	Nitrospinaceae	LS-NOB	LS-NOB sp003545625	91.25	2.54	2439632	46.6869	0.891824	2625	457	21373	5338.36	6852	1	0	0	26
Nitros_507	Bacteria	Nitrospinota	Nitrospinia	Nitrospinales	Nitrospinaceae	LS-NOB	LS-NOB sp003545625	78.23	1.62	1879233	46.9925	0.894533	2296	693	9143	2711.74	3060	0	0	0	10
Nitros_508	Bacteria	Nitrospinota	Nitrospinia	Nitrospinales	Nitrospinaceae	LS-NOB	LS-NOB sp003545625	73.09	1.87	1961532	47.007	0.8954	2335	679	13384	2888.85	3267	0	0	0	12
Nitros_509	Bacteria	Nitrospinota	Nitrospinia	Nitrospinales	Nitrospinaceae	LS-NOB	LS-NOB sp003545625	75.44	3.83	2006692	46.8522	0.895769	2492	811	10031	2474.34	2742	0	0	0	3
Nitros_510	Bacteria	Nitrospinota	Nitrospinia	Nitrospinales	Nitrospinaceae	LS-NOB	LS-NOB sp003545625	68.7	6.1	1643301	46.9074	0.899856	2119	767	8183	2142.5	2279	0	0	0	8
Phyci_d01	Bacteria	Planctomycetota	Phycisphaerae	Phycisphaerales	SM1A02	GCA-002718515	Unknown	53.61	5.68	1039278	45.5266	0.950334	1144	240	17192	4330.32	4447	0	0	0	8
Planc_201	Bacteria	Planctomycetota	Planctomycetia	Pirellulales	Pirellulaceae	Rubripirellula	Rubripirellula sp002862205	82.68	2.67	6697590	52.5797	0.87363	5517	881	54334	7602.26	8964	1	0	0	30
Planc_202	Bacteria	Planctomycetota	Planctomycetia	Pirellulales	UBA7805	UBA7805	UBA7805 sp002168195	68.88	1.78	2472448	50.6565	0.898705	2322	458	27155	5398.36	5828	0	0	0	22
Planc_203	Bacteria	Planctomycetota	Planctomycetia	Pirellulales	Pirellulaceae	UBA721	Unknown	65.02	5.72	3141667	48.2972	0.914926	3524	1432	8049	2193.9	2387	0	0	0	9
Planc_501	Bacteria	Planctomycetota	Planctomycetia	Pirellulales	Pirellulaceae	UBA721	Unknown	63.06	6.91	2478085	48.3239	0.914815	3098	1541	4921	1608.1	1642	0	0	0	5
Planc_502	Bacteria	Planctomycetota	Planctomycetia	Pirellulales	UBA1268	UBA1268	UBA1268 sp014238855	62.94	1.2	2266481	47.8914	0.892712	2427	787	16911	2879.9	3187	1	0	0	9
Planc_503	Bacteria	Planctomycetota	Planctomycetia	Pirellulales	Pirellulaceae	Mariniblastus	Unknown	70.27	0.57	4123306	48.9695	0.864292	3764	751	23004	5490.42	5965	1	1	1	30
Planc_d01	Bacteria	Planctomycetota	Planctomycetia	Pirellulales	Pirellulaceae	UBA721	UBA721 sp012965455	70.34	2.06	3033354	48.8231	0.91492	2991	975	16083	3111.13	3496	0	0	0	11
Planc_d02	Bacteria	Planctomycetota	Planctomycetia	Pirellulales	Pirellulaceae	UBA721	UBA721 sp012965455	89.36	3.66	3823253	48.8163	0.915463	3316	625	56878	6117.2	8109	0	0	0	33
Posei_1501	Archaea	Thermoplasmatota	Poseidoniia	Poseidoniales	Thalassarchaeaceae	MGIIb-O1	MGIIb-O1 sp002498525	55.74	1.13	1098576	56.0561	0.936981	1314	497	10636	2210.41	2422	0	0	0	14
Posei_1502	Archaea	Thermoplasmatota	Poseidoniia	Poseidoniales	Thalassarchaeaceae	Thalassarchaeum	Thalassarchaeum sp002495735	75.25	0.27	1221961	56.303	0.953408	1146	142	45069	8605.36	18510	1	0	0	38
Posei_1504	Archaea	Thermoplasmatota	Poseidoniia	Poseidoniales	Thalassarchaeaceae	MGIIb-O1	MGIIb-O1 sp002498525	88.67	1.2	1475276	56.0454	0.934542	1428	239	35544	6172.7	9505	1	0	1	33
Posei_1505	Archaea	Thermoplasmatota	Poseidoniia	Poseidoniales	Thalassarchaeaceae	Thalassarchaeum	Thalassarchaeum sp002495735	82.55	2.51	1410853	56.4288	0.947894	1334	209	58949	6750.49	17300	1	0	0	40
Posei_1506	Archaea	Thermoplasmatota	Poseidoniia	MGIII	CG-Epi1	CG-Epi1	Unknown	67.41	0.43	693147	43.4054	0.962514	770	109	16789	6359.15	7459	0	0	0	23
Posei_1507	Archaea	Thermoplasmatota	Poseidoniia	Poseidoniales	Thalassarchaeaceae	MGIIb-O1	MGIIb-O1 sp002498525	92.59	0.2	1478765	56.1072	0.935631	1378	180	36916	8215.36	12500	0	0	0	41
Posei_1508	Archaea	Thermoplasmatota	Poseidoniia	MGIII	CG-Epi1	UBA8886	UBA8886 sp002731655	79.73	1.13	912741	64.1915	0.9549	1200	427	11164	2137.57	2397	0	0	0	15
Posei_1509	Archaea	Thermoplasmatota	Poseidoniia	Poseidoniales	Thalassarchaeaceae	Thalassarchaeum	Thalassarchaeum sp002507125	89.68	3.33	1600095	59.0494	0.944662	1501	202	55679	7921.26	17234	1	0	0	44
Posei_1510	Archaea	Thermoplasmatota	Poseidoniia	Poseidoniales	Thalassarchaeaceae	Thalassarchaeum	Thalassarchaeum sp002495735	79.66	0.39	1303773	55.4731	0.952746	1189	75	99510	17383.6	24393	1	0	0	43
Posei_1511	Archaea	Thermoplasmatota	Poseidoniia	Poseidoniales	Thalassarchaeaceae	MGIIb-O1	MGIIb-O1 sp002498525	92.29	0.78	1507646	56.0974	0.936429	1341	115	56938	13110	24761	1	0	0	44
Posei_1512	Archaea	Thermoplasmatota	Poseidoniia	Poseidoniales	Thalassarchaeaceae	Thalassarchaeum	Thalassarchaeum sp002507125	81.61	1.54	1174464	59.335	0.946006	1081	152	44331	7726.74	14223	0	1	1	37
Posei_1513	Archaea	Thermoplasmatota	Poseidoniia	MGIII	CG-Epi1	UBA8886	UBA8886 sp002731655	78.93	1.49	1036654	64.1632	0.94844	1312	443	11162	2340.08	2669	1	0	0	19
Posei_1514	Archaea	Thermoplasmatota	Poseidoniia	MGIII	CG-Epi1	CG-Epi1	CG-Epi1 sp002506485	75.31	0.11	705914	43.537	0.962335	775	106	27172	6659.57	7835	1	0	0	27
Posei_1515	Archaea	Thermoplasmatota	Poseidoniia	MGIII	CG-Epi1	CG-Epi1	Unknown	78.09	1.95	1616707	44.3806	0.936146	1709	372	30285	4345.99	5007	0	0	0	21
Posei_1516	Archaea	Thermoplasmatota	Poseidoniia	MGIII	CG-Epi1	UBA8886	UBA8886 sp002731655	81.46	5.35	1123091	64.0656	0.950281	1399	445	13538	2523.8	2999	0	1	0	19
Posei_1517	Archaea	Thermoplasmatota	Poseidoniia	Poseidoniales	Thalassarchaeaceae	MGIIb-O1	MGIIb-O1 sp002498525	84.85	1.75	1426336	56.306	0.936009	1316	149	69797	9572.72	14168	1	0	0	35
Posei_1518	Archaea	Thermoplasmatota	Poseidoniia	Poseidoniales	Thalassarchaeaceae	Thalassarchaeum	Thalassarchaeum sp002507125	94.44	6.74	1638451	58.4135	0.94521	1540	224	67073	7314.51	17829	0	0	0	41
Posei_1519	Archaea	Thermoplasmatota	Poseidoniia	Poseidoniales	Thalassarchaeaceae	Thalassarchaeum	Thalassarchaeum sp002495735	79.9	0.05	1252456	55.5481	0.953682	1129	74	123132	16925.1	25374	0	0	0	37
Posei_1521	Archaea	Thermoplasmatota	Poseidoniia	MGIII	CG-Epi1	CG-Epi1	CG-Epi1 sp002506485	65.22	0.32	695100	43.3319	0.959905	778	105	25878	6620	7461	0	0	0	24
Posei_1522	Archaea	Thermoplasmatota	Poseidoniia	Poseidoniales	Thalassarchaeaceae	Thalassarchaeum	Thalassarchaeum sp002495735	74.01	0.22	1177146	55.8165	0.954052	1105	109	38220	10799.5	13658	1	0	0	33
Posei_1523	Archaea	Thermoplasmatota	Poseidoniia	Poseidoniales	Thalassarchaeaceae	MGIIb-O1	MGIIb-O1 sp002498525	93.65	0.19	1473667	56.3452	0.935443	1295	102	85664	14447.7	23934	1	0	2	44
Posei_1524	Archaea	Thermoplasmatota	Poseidoniia	Poseidoniales	Thalassarchaeaceae	Thalassarchaeum	Thalassarchaeum sp002495735	82	6.98	1681218	55.8722	0.944511	1655	321	87577	5237.44	19872	2	0	0	45
Posei_201	Archaea	Thermoplasmatota	Poseidoniia	Poseidoniales	Thalassarchaeaceae	Thalassarchaeum	Thalassarchaeum sp002495735	77.53	2.73	1286227	55.2052	0.949594	1510	488	11827	2635.71	3248	1	0	0	24
Posei_202	Archaea	Thermoplasmatota	Poseidoniia	Poseidoniales	Thalassarchaeaceae	Thalassarchaeum	Thalassarchaeum sp002495735	89.98	1.14	1353700	55.3118	0.951549	1395	274	30707	4940.51	6974	0	0	0	40
Posei_203	Archaea	Thermoplasmatota	Poseidoniia	Poseidoniales	Thalassarchaeaceae	Thalassarchaeum	Thalassarchaeum sp002495735	96.46	1.13	1448801	55.345	0.952399	1309	123	91859	11778.9	29393	1	0	0	43
Posei_204	Archaea	Thermoplasmatota	Poseidoniia	Poseidoniales	Thalassarchaeaceae	MGIIb-O2	MGIIb-O2 sp004195525	61.09	0.7	905727	44.5247	0.940896	970	244	18418	3712	3971	1	0	0	20
Posei_205	Archaea	Thermoplasmatota	Poseidoniia	Poseidoniales	Thalassarchaeaceae	Thalassarchaeum	Thalassarchaeum sp002495735	93.69	0.24	1477952	55.4399	0.94954	1370	186	46580	7945.98	15987	1	1	0	40
Posei_206	Archaea	Thermoplasmatota	Poseidoniia	Poseidoniales	Thalassarchaeaceae	MGIIb-O1	MGIIb-O1 sp8684u	87.95	0.25	1487884	52.7045	0.940683	1309	61	86736	24391.5	42989	1	0	1	40
Posei_207	Archaea	Thermoplasmatota	Poseidoniia	Poseidoniales	Thalassarchaeaceae	Thalassarchaeum	Unknown	67.48	0.27	1067217	56.0781	0.951495	997	112	31442	9528.72	14735	1	1	1	28
Posei_208	Archaea	Thermoplasmatota	Poseidoniia	Poseidoniales	Thalassarchaeaceae	MGIIb-O1	MGIIb-O1 sp8684u	68.57	0.99	1098823	52.4913	0.939164	1115	201	18558	5466.78	6166	1	0	0	29
Posei_209	Archaea	Thermoplasmatota	Poseidoniia	Poseidoniales	Thalassarchaeaceae	Thalassarchaeum	Thalassarchaeum sp002457605	91.03	5.75	1270767	53.7986	0.954426	1208	123	48256	10331.4	16605	1	0	0	30
Posei_210	Archaea	Thermoplasmatota	Poseidoniia	Poseidoniales	Thalassarchaeaceae	Thalassarchaeum	Unknown	87.98	0.19	1366776	55.7003	0.951484	1329	231	42755	5916.78	14233	1	0	0	30
Posei_211	Archaea	Thermoplasmatota	Poseidoniia	Poseidoniales	Thalassarchaeaceae	MGIIb-O1	MGIIb-O1 sp8684u	95.38	0.3	1543824	52.5835	0.940506	1347	80	108338	19297.8	32065	1	0	2	40
Posei_212	Archaea	Thermoplasmatota	Poseidoniia	Poseidoniales	Thalassarchaeaceae	MGIIb-O1	MGIIb-O1 sp8684u	82.57	3.2	1412472	52.6595	0.943883	1594	462	14762	3057.3	3971	1	0	0	23
Posei_213	Archaea	Thermoplasmatota	Poseidoniia	Poseidoniales	Thalassarchaeaceae	MGIIb-O2	MGIIb-O2 sp016777225	85.98	0.23	1432709	37.6016	0.948702	1298	70	148373	20467.3	31861	1	0	1	37
Posei_214	Archaea	Thermoplasmatota	Poseidoniia	Poseidoniales	Thalassarchaeaceae	Thalassarchaeum	Thalassarchaeum sp002698225	72.06	5.81	1455532	51.6817	0.957923	1562	458	17334	3178.02	4528	0	0	0	21
Posei_215	Archaea	Thermoplasmatota	Poseidoniia	Poseidoniales	Thalassarchaeaceae	Thalassarchaeum	Thalassarchaeum sp002457605	87.6	3.18	1320015	53.8411	0.954594	1221	108	50727	12222.4	17994	0	0	0	35
Posei_216	Archaea	Thermoplasmatota	Poseidoniia	Poseidoniales	Thalassarchaeaceae	Thalassarchaeum	Thalassarchaeum sp019654055	73.93	1.66	1046775	60.35	0.953582	936	109	36886	9603.44	14941	0	0	0	25
Posei_217	Archaea	Thermoplasmatota	Poseidoniia	Poseidoniales	Thalassarchaeaceae	Thalassarchaeum	Thalassarchaeum sp002495735	93.99	1.08	1464300	55.4322	0.952467	1332	127	106320	11529.9	24296	1	0	0	40
Posei_218	Archaea	Thermoplasmatota	Poseidoniia	Poseidoniales	Thalassarchaeaceae	MGIIb-O2	Unknown	81.55	2.84	1304390	38.1023	0.949454	1246	167	28106	7810.72	9706	1	0	0	30
Posei_219	Archaea	Thermoplasmatota	Poseidoniia	Poseidoniales	Thalassarchaeaceae	Thalassarchaeum	Thalassarchaeum sp002495735	93.91	1.24	1481916	55.3196	0.954018	1333	128	101067	11577.5	32914	1	0	0	42
Posei_220	Archaea	Thermoplasmatota	Poseidoniia	Poseidoniales	Thalassarchaeaceae	MGIIb-O2	MGIIb-O2 sp004195525	67.4	0.41	1116766	44.2834	0.941822	1212	358	15608	3119.46	3623	0	0	0	22
Posei_221	Archaea	Thermoplasmatota	Poseidoniia	Poseidoniales	Thalassarchaeaceae	MGIIb-O1	MGIIb-O1 sp002498525	82.33	1.32	1430753	56.1903	0.933897	1461	319	27913	4485.12	5826	1	0	0	33
Posei_222	Archaea	Thermoplasmatota	Poseidoniia	Poseidoniales	Thalassarchaeaceae	Thalassarchaeum	Thalassarchaeum sp002495735	85.64	0.38	1436765	55.4161	0.949168	1308	127	123131	11313.1	23463	1	1	1	44
Posei_224	Archaea	Thermoplasmatota	Poseidoniia	Poseidoniales	Thalassarchaeaceae	MGIIb-O2	MGIIb-O2 sp004195525	64.46	1.82	1011748	44.4536	0.942829	1110	352	15793	2874.28	3309	0	0	0	17
Posei_225	Archaea	Thermoplasmatota	Poseidoniia	Poseidoniales	Thalassarchaeaceae	MGIIb-O1	MGIIb-O1 sp002498525	83	0.91	1317076	56.1999	0.938277	1431	415	15363	3173.68	3924	0	0	0	12
Posei_226	Archaea	Thermoplasmatota	Poseidoniia	Poseidoniales	Thalassarchaeaceae	Thalassarchaeum	Thalassarchaeum sp002507125	55.78	0.39	1045672	58.0156	0.944582	1305	542	9110	1929.28	2052	0	0	0	5
Posei_227	Archaea	Thermoplasmatota	Poseidoniia	MGIII	CG-Epi1	CG-Epi1	Unknown	79.37	3.4	890939	35.9908	0.96203	937	148	26138	6019.86	7208	0	0	0	26
Posei_228	Archaea	Thermoplasmatota	Poseidoniia	Poseidoniales	Thalassarchaeaceae	MGIIb-O2	Unknown	78	0.29	1311036	44.1466	0.942111	1395	380	17526	3450.09	4108	0	0	0	23
Posei_229	Archaea	Thermoplasmatota	Poseidoniia	Poseidoniales	Thalassarchaeaceae	MGIIb-O1	MGIIb-O1 sp8684u	95.5	1.18	1548953	52.6143	0.94153	1379	110	84733	14081.4	25148	1	0	0	37
Posei_501	Archaea	Thermoplasmatota	Poseidoniia	Poseidoniales	Thalassarchaeaceae	Thalassarchaeum	Thalassarchaeum sp002495735	94.16	0.32	1454094	55.3218	0.951492	1309	110	140555	13219	40489	1	0	0	45
Posei_502	Archaea	Thermoplasmatota	Poseidoniia	Poseidoniales	Thalassarchaeaceae	MGIIb-O1	MGIIb-O1 sp002498525	95.34	0.69	1519071	56.2481	0.934588	1331	105	90292	14467.3	22264	1	0	1	43
Posei_503	Archaea	Thermoplasmatota	Poseidoniia	Poseidoniales	Thalassarchaeaceae	MGIIb-O1	MGIIb-O1 sp002498525	85.06	0.18	1474974	56.3925	0.934902	1292	103	89310	14320.1	24838	1	0	1	44
Posei_504	Archaea	Thermoplasmatota	Poseidoniia	Poseidoniales	Thalassarchaeaceae	Thalassarchaeum	Thalassarchaeum sp002495735	92.92	2.73	1526991	55.1516	0.947921	1386	119	143059	12831.9	65744	1	1	1	46
Posei_505	Archaea	Thermoplasmatota	Poseidoniia	Poseidoniales	Thalassarchaeaceae	MGIIb-O2	MGIIb-O2 sp004195525	85.96	0.7	1409953	44.2732	0.940587	1449	319	20675	4419.92	5653	1	0	0	26
Posei_506	Archaea	Thermoplasmatota	Poseidoniia	Poseidoniales	Thalassarchaeaceae	MGIIb-O1	MGIIb-O1 sp002498525	96.19	0.18	1449534	56.3772	0.934101	1272	105	72523	13805.1	22511	1	1	1	40
Posei_507	Archaea	Thermoplasmatota	Poseidoniia	Poseidoniales	Thalassarchaeaceae	Thalassarchaeum	Thalassarchaeum sp002495735	82.59	1.93	1448110	56.2147	0.94718	1362	199	87197	7276.93	28929	0	0	1	38
Posei_508	Archaea	Thermoplasmatota	Poseidoniia	Poseidoniales	Thalassarchaeaceae	MGIIb-P	Unknown	59.34	0.08	1418761	50.0157	0.955035	1307	194	26074	7313.2	8523	0	0	1	32
Posei_509	Archaea	Thermoplasmatota	Poseidoniia	Poseidoniales	Thalassarchaeaceae	Thalassarchaeum	Thalassarchaeum sp002495735	84.92	0.06	1354580	55.4713	0.95239	1203	66	99382	20523.9	28484	1	0	1	45
Posei_510	Archaea	Thermoplasmatota	Poseidoniia	MGIII	CG-Epi1	CG-Epi1	Unknown	74.3	2.52	903851	35.7635	0.963098	980	146	25571	6190.76	6776	0	0	0	18
Posei_511	Archaea	Thermoplasmatota	Poseidoniia	Poseidoniales	Thalassarchaeaceae	Thalassarchaeum	Thalassarchaeum sp002495735	94.11	3.05	1487422	55.5019	0.950884	1395	199	62198	7474.48	18183	1	0	1	39
Posei_512	Archaea	Thermoplasmatota	Poseidoniia	Poseidoniales	Thalassarchaeaceae	MGIIb-O1	MGIIb-O1 sp8684u	95.15	0.65	1552150	52.5817	0.939523	1386	92	99298	16871.2	31988	1	0	1	41
Posei_513	Archaea	Thermoplasmatota	Poseidoniia	Poseidoniales	Thalassarchaeaceae	Thalassarchaeum	Unknown	87.39	1.76	1435438	55.6909	0.952985	1390	261	40931	5499.76	12170	1	0	0	38
Posei_514	Archaea	Thermoplasmatota	Poseidoniia	Poseidoniales	Thalassarchaeaceae	Thalassarchaeum	Unknown	62.98	0.02	927856	55.9867	0.951536	889	128	34722	7248.88	10173	0	1	0	23
Posei_515	Archaea	Thermoplasmatota	Poseidoniia	Poseidoniales	Thalassarchaeaceae	MGIIb-O1	MGIIb-O1 sp8684u	62.46	0.16	1036222	53.6468	0.941132	1041	189	17446	5482.66	6050	0	0	0	25
Posei_516	Archaea	Thermoplasmatota	Poseidoniia	Poseidoniales	Thalassarchaeaceae	Thalassarchaeum	Unknown	87.89	7.67	1544002	55.5631	0.948698	1633	432	30434	3574.08	5194	1	1	1	33
Posei_517	Archaea	Thermoplasmatota	Poseidoniia	Poseidoniales	Thalassarchaeaceae	Thalassarchaeum	Thalassarchaeum sp002495735	84.88	0.29	1460566	55.3323	0.951257	1315	104	101230	14043.9	32814	1	0	1	44
Posei_518	Archaea	Thermoplasmatota	Poseidoniia	Poseidoniales	Thalassarchaeaceae	MGIIb-O2	MGIIb-O2 sp004195525	78.63	2.98	1259803	44.2922	0.941542	1308	353	16490	3568.85	4471	1	0	1	24
Posei_519	Archaea	Thermoplasmatota	Poseidoniia	Poseidoniales	Thalassarchaeaceae	MGIIb-P	Unknown	87.57	0.31	1594800	49.8645	0.954818	1761	598	15833	2666.89	3045	0	0	0	22
Posei_520	Archaea	Thermoplasmatota	Poseidoniia	Poseidoniales	Thalassarchaeaceae	Thalassarchaeum	Thalassarchaeum sp002507125	50.32	0.73	1178329	58.3826	0.947839	1368	494	11608	2385.28	2603	0	0	0	13
Posei_521	Archaea	Thermoplasmatota	Poseidoniia	Poseidoniales	Thalassarchaeaceae	MGIIb-O1	MGIIb-O1 sp002498525	94.61	0.24	1501689	56.1196	0.934811	1316	90	89184	16685.4	28174	1	0	1	42
Posei_522	Archaea	Thermoplasmatota	Poseidoniia	Poseidoniales	Thalassarchaeaceae	Thalassarchaeum	Thalassarchaeum sp002495735	94.63	0.16	1496501	55.2897	0.949059	1351	113	142428	13243.4	44234	1	0	1	45
Posei_523	Archaea	Thermoplasmatota	Poseidoniia	Poseidoniales	Thalassarchaeaceae	MGIIb-O1	MGIIb-O1 sp002498525	86.24	0.21	1504492	56.2157	0.935838	1322	115	56853	13082.5	21977	1	0	1	43
Posei_524	Archaea	Thermoplasmatota	Poseidoniia	Poseidoniales	Thalassarchaeaceae	MGIIb-O2	MGIIb-O2 sp004195525	61.46	2.17	1156578	44.4116	0.940928	1291	450	12356	2570.17	2870	0	0	0	16
Posei_525	Archaea	Thermoplasmatota	Poseidoniia	Poseidoniales	Thalassarchaeaceae	Thalassarchaeum	Thalassarchaeum sp002495735	95.2	4.6	1556568	55.3793	0.951891	1427	155	169638	10042.4	34381	1	1	1	44
Posei_526	Archaea	Thermoplasmatota	Poseidoniia	Poseidoniales	Thalassarchaeaceae	MGIIb-O1	MGIIb-O1 sp002498525	93.11	0.2	1500753	56.2304	0.934586	1317	99	65265	15159.1	24595	1	0	0	43
Posei_527	Archaea	Thermoplasmatota	Poseidoniia	Poseidoniales	Thalassarchaeaceae	Thalassarchaeum	Thalassarchaeum sp002495735	92.22	0.8	1415488	55.5223	0.948346	1312	171	95624	8277.71	19206	1	1	1	38
Posei_528	Archaea	Thermoplasmatota	Poseidoniia	Poseidoniales	Thalassarchaeaceae	Thalassarchaeum	Thalassarchaeum sp002507125	57.32	4.51	1108951	58.3186	0.947059	1338	539	10007	2057.42	2233	0	0	0	6
Posei_d01	Archaea	Thermoplasmatota	Poseidoniia	Poseidoniales	Thalassarchaeaceae	MGIIb-O1	MGIIb-O1 sp002498525	86.77	0.15	1541840	56.2012	0.933994	1354	116	107132	13291.7	24010	1	2	1	47
Posei_d02	Archaea	Thermoplasmatota	Poseidoniia	MGIII	CG-Epi1	UBA8886	UBA8886 sp003193815	73.25	2.37	982122	64.1356	0.951939	1285	455	8138	2158.51	2371	0	1	0	12
Posei_d03	Archaea	Thermoplasmatota	Poseidoniia	Poseidoniales	Poseidoniaceae	UBA60	UBA60 sp002503395	66.8	1.06	1774949	53.206	0.941215	1795	564	14429	3147.07	3915	0	0	0	20
Posei_d04	Archaea	Thermoplasmatota	Poseidoniia	MGIII	CG-Epi1	CG-Epi1	CG-Epi1 sp015658585	88.54	0.06	1129300	43.1915	0.958511	1124	106	50165	10653.8	13439	1	1	0	35
Posei_d05	Archaea	Thermoplasmatota	Poseidoniia	MGIII	CG-Epi1	UBA8886	UBA8886 sp003193815	90.7	0.69	1156846	64.5535	0.953368	1409	412	17454	2807.88	3485	1	0	0	23
Posei_d06	Archaea	Thermoplasmatota	Poseidoniia	Poseidoniales	Thalassarchaeaceae	MGIIb-O1	MGIIb-O1 sp002498525	94.63	0.12	1540725	56.1801	0.932157	1357	112	110477	13756.5	24753	1	1	1	44
Posei_d07	Archaea	Thermoplasmatota	Poseidoniia	MGIII	CG-Epi1	UBA8886	UBA8886 sp003193815	89.3	0.9	1257581	64.616	0.95333	1363	253	41871	4970.68	8120	1	1	0	38
Posei_d08	Archaea	Thermoplasmatota	Poseidoniia	Poseidoniales	Thalassarchaeaceae	MGIIb-O1	MGIIb-O1 sp002498525	87.87	0.17	1533454	56.2293	0.933298	1340	117	83737	13106.4	24558	1	1	1	46
Posei_d10	Archaea	Thermoplasmatota	Poseidoniia	Poseidoniales	Poseidoniaceae	UBA60	Unknown	59.71	3.41	1639164	54.0539	0.936153	1886	771	9453	2126.02	2265	0	0	0	7
Posei_d11	Archaea	Thermoplasmatota	Poseidoniia	Poseidoniales	Thalassarchaeaceae		Unknown	66.45	2.13	1373853	59.8919	0.954267	1655	663	9197	2072.18	2264	0	0	0	12
Posei_d12	Archaea	Thermoplasmatota	Poseidoniia	Poseidoniales	Thalassarchaeaceae	MGIIb-O1	MGIIb-O1 sp002498525	94.77	0.13	1518436	56.244	0.933283	1335	131	57990	11591.1	20163	1	1	2	46
Posei_d13	Archaea	Thermoplasmatota	Poseidoniia	MGIII	CG-Epi1	CG-Epi1	CG-Epi1 sp015658585	63.39	0.74	1519849	45.6813	0.916703	1760	632	11755	2404.82	2684	1	0	1	27
Posei_d14	Archaea	Thermoplasmatota	Poseidoniia	MGIII	CG-Epi1	UBA8886	UBA8886 sp003193815	96.52	0.63	1294488	64.4655	0.95439	1298	140	73039	9246.34	17992	1	1	0	42
Posei_d15	Archaea	Thermoplasmatota	Poseidoniia	Poseidoniales	Poseidoniaceae	MGIIa-L1	Unknown	69.79	5.86	2133077	41.7731	0.936797	2073	522	30008	4086.35	7340	0	0	0	34
Posei_d16	Archaea	Thermoplasmatota	Poseidoniia	Poseidoniales	Poseidoniaceae	MGIIa-K1	MGIIa-K1 sp004195515	70.34	0.49	1296476	45.4668	0.951816	1577	598	8748	2168.02	2368	0	0	0	4
Posei_d17	Archaea	Thermoplasmatota	Poseidoniia	MGIII	CG-Epi1	UBA8886	UBA8886 sp003193815	71.51	2.99	1016631	64.5131	0.94804	1337	468	11601	2172.29	2398	1	0	1	20
Posei_d18	Archaea	Thermoplasmatota	Poseidoniia	Poseidoniales	Thalassarchaeaceae	MGIIb-O1	MGIIb-O1 sp002498525	94.44	0.18	1532532	56.2042	0.933592	1345	112	89054	13683.3	22297	1	2	1	45
Posei_d19	Archaea	Thermoplasmatota	Poseidoniia	Poseidoniales	Poseidoniaceae	UBA60	UBA60 sp002503395	73.19	3.82	1648443	53.1662	0.939025	1916	812	8767	2030.1	2233	0	0	0	15
Posei_d20	Archaea	Thermoplasmatota	Poseidoniia	Poseidoniales	Poseidoniaceae	MGIIa-L1	Unknown	82.46	0.36	1791451	41.893	0.941334	1547	168	55019	10663.4	14747	1	0	0	28
Posei_d21	Archaea	Thermoplasmatota	Poseidoniia	MGIII	CG-Epi1	CG-Epi1	CG-Epi1 sp015658585	87.97	0.03	1047815	43.4448	0.95829	1067	91	45156	11514.5	17004	1	1	1	36
Posei_d22	Archaea	Thermoplasmatota	Poseidoniia	Poseidoniales	Thalassarchaeaceae	MGIIb-O1	MGIIb-O1 sp002498525	87.36	0.18	1554430	55.9471	0.929703	1373	94	73326	16536.5	34114	1	1	1	45
SAR324_1501	Bacteria	SAR324	SAR324	SAR324	NAC60-12	Arctic96AD-7	Arctic96AD-7 sp002082305	90.79	1.63	2852732	43.0784	0.908509	2725	436	59156	6542.96	10151	0	0	0	23
SAR324_1502	Bacteria	SAR324	SAR324	SAR324	NAC60-12	Arctic96AD-7	Arctic96AD-7 sp002082305	89.34	1.94	2835783	43.1636	0.912106	2756	518	33715	5474.48	7698	0	0	0	22
SAR324_1503	Bacteria	SAR324	SAR324	SAR324	NAC60-12	Arctic96AD-7	Arctic96AD-7 sp002082305	89.1	1.6	3001515	43.2548	0.909357	2835	486	45729	6175.96	10075	1	1	1	25
SAR324_1504	Bacteria	SAR324	SAR324	SAR324	NAC60-12	Arctic96AD-7	Arctic96AD-7 sp002082305	90.77	2.79	2990201	43.2704	0.90944	2872	566	52262	5283.04	8339	0	1	1	24
SAR324_1505	Bacteria	SAR324	SAR324	SAR324	NAC60-12	UBA8110	UBA8110 sp002707655	61.09	1.28	2115920	57.2956	0.920476	2833	1107	6608	1911.4	1980	0	0	0	6
SAR324_1506	Bacteria	SAR324	SAR324	SAR324	NAC60-12	Arctic96AD-7	Arctic96AD-7 sp002082305	91.24	3.98	2642966	42.589	0.905512	2554	521	36164	5072.87	9948	0	0	0	22
SAR324_1507	Bacteria	SAR324	SAR324	SAR324	NAC60-12	Arctic96AD-7	Arctic96AD-7 sp002082305	89.97	0.85	2229886	42.3802	0.90548	2061	224	45776	9954.85	13996	0	0	0	25
SAR324_1508	Bacteria	SAR324	SAR324	SAR324	NAC60-12	Arctic96AD-7	Arctic96AD-7 sp002082305	91.15	3.25	3001559	43.1169	0.903557	2880	469	40510	6399.91	9899	0	0	0	25
SAR324_201	Bacteria	SAR324	SAR324	SAR324	NAC60-12	Arctic96AD-7	Arctic96AD-7 sp002082305	91.76	3.79	2899700	42.7703	0.90839	2881	604	34475	4800.83	6745	0	0	0	18
SAR324_202	Bacteria	SAR324	SAR324	SAR324	NAC60-12	Arctic96AD-7	Arctic96AD-7 sp002082305	87.09	0.51	2229787	42.3457	0.90677	2103	297	38295	7507.7	9232	0	0	0	20
SAR324_203	Bacteria	SAR324	SAR324	SAR324	NAC60-12	Arctic96AD-7	Arctic96AD-7 sp002082305	84.8	3.18	2827318	43.068	0.911963	2766	654	30029	4323.12	5669	0	0	0	23
SAR324_204	Bacteria	SAR324	SAR324	SAR324	NAC60-12	Arctic96AD-7	Arctic96AD-7 sp002082305	89.41	2.13	2801711	42.8288	0.907339	2794	594	37570	4716.69	7198	0	0	0	22
SAR324_205	Bacteria	SAR324	SAR324	SAR324	NAC60-12	Arctic96AD-7	Arctic96AD-7 sp002082305	89.69	4.11	2628865	42.574	0.908485	2718	633	21583	4153.03	5497	0	0	0	18
SAR324_206	Bacteria	SAR324	SAR324	SAR324	NAC60-12	Arctic96AD-7	Arctic96AD-7 sp002082305	93.96	1.73	2912924	42.9461	0.907184	2838	546	70172	5335.03	8604	0	0	0	26
SAR324_207	Bacteria	SAR324	SAR324	SAR324	NAC60-12	UBA8110	UBA8110 sp002707655	53.71	0.96	1672869	57.3392	0.923176	2314	975	6245	1715.76	1785	0	0	0	3
SAR324_208	Bacteria	SAR324	SAR324	SAR324	NAC60-12	Arctic96AD-7	Arctic96AD-7 sp002082305	94.8	0.82	2832240	42.6064	0.903318	2666	348	72911	8138.62	14447	0	0	0	28
SAR324_209	Bacteria	SAR324	SAR324	SAR324	NAC60-12	Arctic96AD-7	Arctic96AD-7 sp002082305	88.45	2.37	2356822	42.2616	0.902237	2176	213	69674	11064.9	14921	1	1	2	25
SAR324_210	Bacteria	SAR324	SAR324	SAR324	NAC60-12	Arctic96AD-7	Arctic96AD-7 sp002082305	74.49	2.93	1935961	42.0649	0.908841	2315	919	11357	2106.6	2298	0	0	0	7
SAR324_211	Bacteria	SAR324	SAR324	SAR324	NAC60-12	Arctic96AD-7	Arctic96AD-7 sp002082305	94.17	6.65	2838458	42.8408	0.911955	2814	627	34510	4527.05	6421	0	0	0	16
SAR324_212	Bacteria	SAR324	SAR324	SAR324	NAC60-12	Arctic96AD-7	Arctic96AD-7 sp002082305	58.39	0.99	1269193	42.2031	0.928069	1233	271	15341	4683.37	5004	0	0	0	10
SAR324_213	Bacteria	SAR324	SAR324	SAR324	NAC60-12	Arctic96AD-7	Arctic96AD-7 sp002082305	93.61	2.57	2782628	43.052	0.911123	2745	670	29308	4153.18	5599	1	1	1	18
SAR324_214	Bacteria	SAR324	SAR324	SAR324	NAC60-12	Arctic96AD-7	Arctic96AD-7 sp002082305	89.96	6.39	2961907	43.1612	0.910944	2868	548	34264	5404.94	7527	0	0	0	22
SAR324_215	Bacteria	SAR324	SAR324	SAR324	NAC60-12	UBA8110	UBA8110 sp002707655	60.52	1.42	1975641	57.3804	0.924687	2632	1077	6459	1834.39	1923	0	0	0	3
SAR324_216	Bacteria	SAR324	SAR324	SAR324	NAC60-12	Arctic96AD-7	Arctic96AD-7 sp002082305	92.22	0.99	2811748	42.7496	0.908138	2688	469	40465	5995.2	9646	0	0	0	13
SAR324_501	Bacteria	SAR324	SAR324	SAR324	NAC60-12	Arctic96AD-7	Arctic96AD-7 sp002082305	90.5	2.98	2972889	43.005	0.905928	2926	644	34344	4616.29	6334	3	3	3	23
SAR324_502	Bacteria	SAR324	SAR324	SAR324	NAC60-12	Arctic96AD-7	Arctic96AD-7 sp002082305	89.47	3.11	2910995	43.1707	0.910125	2854	582	35434	5001.71	6912	0	0	0	25
SAR324_503	Bacteria	SAR324	SAR324	SAR324	NAC60-12	UBA8110	UBA8110 sp002707655	61.06	2.41	2488480	57.6032	0.921788	3255	1317	9868	1889.51	2017	0	0	0	3
SAR324_504	Bacteria	SAR324	SAR324	SAR324	NAC60-12	UBA8110	UBA8110 sp002707655	75.32	3.2	2444947	57.416	0.920841	3098	1088	9496	2247.19	2449	0	0	0	12
SAR324_505	Bacteria	SAR324	SAR324	SAR324	NAC60-12	Arctic96AD-7	Arctic96AD-7 sp002082305	88.61	3.24	2865578	43.023	0.912409	2801	586	33810	4890.06	6631	0	1	0	17
SAR324_506	Bacteria	SAR324	SAR324	SAR324	NAC60-12	UBA8110	UBA8110 sp002707655	85.68	3.58	2906292	57.3746	0.919704	3430	954	21788	3046.43	3685	0	0	0	15
SAR324_507	Bacteria	SAR324	SAR324	SAR324	NAC60-12	Arctic96AD-7	Arctic96AD-7 sp002082305	92.55	7.34	2959797	43.0009	0.9101	2891	610	67099	4852.13	6955	0	0	0	25
SAR324_508	Bacteria	SAR324	SAR324	SAR324	NAC60-12	Arctic96AD-7	Arctic96AD-7 sp002082305	84.75	0.9	2285076	42.2924	0.906415	2145	268	38607	8526.4	11015	0	0	0	23
SAR324_509	Bacteria	SAR324	SAR324	SAR324	NAC60-12	Arctic96AD-7	Arctic96AD-7 sp002082305	94.26	1.77	2817113	42.6361	0.905196	2717	507	45447	5556.44	8488	0	0	0	23
SAR324_510	Bacteria	SAR324	SAR324	SAR324	NAC60-12	Arctic96AD-7	Arctic96AD-7 sp002082305	91.3	2.75	2719215	42.7804	0.906333	2612	402	48447	6764.22	10803	0	0	0	24
SAR324_511	Bacteria	SAR324	SAR324	SAR324	NAC60-12	UBA8110	UBA8110 sp002707655	71.84	1.87	2075483	57.4684	0.923847	2763	1089	8793	1905.86	2009	0	0	0	1
SAR324_512	Bacteria	SAR324	SAR324	SAR324	NAC60-12	Arctic96AD-7	Arctic96AD-7 sp002082305	87.96	0.57	2033539	42.311	0.913071	1904	272	35068	7476.25	9181	0	0	0	16
SAR324_513	Bacteria	SAR324	SAR324	SAR324	NAC60-12	Arctic96AD-7	Arctic96AD-7 sp002082305	93.93	1.23	2861405	42.8261	0.907243	2747	460	47253	6220.45	10159	0	0	0	22
SAR324_515	Bacteria	SAR324	SAR324	SAR324	NAC60-12	Arctic96AD-7	Arctic96AD-7 sp002082305	91.36	1.03	2536831	42.8558	0.907906	2444	416	46545	6098.15	9565	0	0	0	13
SAR324_516	Bacteria	SAR324	SAR324	SAR324	NAC60-12	UBA8110	UBA8110 sp002707655	62.99	2.59	1991740	57.2957	0.923602	2732	1122	9146	1775.17	1813	0	0	0	6
SAR324_517	Bacteria	SAR324	SAR324	SAR324	NAC60-12	Arctic96AD-7	Arctic96AD-7 sp002082305	90.48	2.32	3041255	43.1373	0.910053	3035	727	28823	4183.29	5556	0	1	1	18
SAR324_518	Bacteria	SAR324	SAR324	SAR324	NAC60-12	Arctic96AD-7	Arctic96AD-7 sp002082305	90.2	3.74	2524303	42.4589	0.912962	2523	603	33627	4186.24	6572	0	1	0	15
SAR324_519	Bacteria	SAR324	SAR324	SAR324	NAC60-12	Arctic96AD-7	Arctic96AD-7 sp002082305	90.28	3.2	3562370	44.6154	0.892511	3248	888	35392	4011.68	4912	2	6	10	32
SAR324_520	Bacteria	SAR324	SAR324	SAR324	NAC60-12	Arctic96AD-7	Arctic96AD-7 sp002082305	89.81	5.28	2802263	42.7958	0.913568	2945	859	34767	3262.24	4190	0	0	0	14
SAR324_521	Bacteria	SAR324	SAR324	SAR324	NAC60-12	Arctic96AD-7	Arctic96AD-7 sp002082305	91.89	3.88	2895137	42.9039	0.910243	2817	555	36430	5216.46	7645	0	0	0	23
SAR324_522	Bacteria	SAR324	SAR324	SAR324	NAC60-12	UBA8110	UBA8110 sp002707655	58.91	5.19	2349064	57.9224	0.922133	3128	1377	7200	1705.93	1716	0	0	0	3
SAR324_d01	Bacteria	SAR324	SAR324	SAR324	NAC60-12	Arctic96AD-7	Arctic96AD-7 sp002082305	90.48	0.75	2574045	42.6554	0.902318	2439	361	54638	7130.32	11270	0	0	0	20
SAR324_d02	Bacteria	SAR324	SAR324	SAR324	NAC60-12	UBA8110	UBA8110 sp002707655	56.75	3.67	2108754	57.523	0.917792	2815	1214	6459	1737.03	1808	0	0	0	4
SAR324_d03	Bacteria	SAR324	SAR324	SAR324	NAC60-12	Arctic96AD-7	Arctic96AD-7 sp016764995	87.26	2.02	2624819	42.9724	0.901024	2546	249	47407	10541.4	15589	0	0	0	15
SAR324_d04	Bacteria	SAR324	SAR324	SAR324	NAC60-12	Arctic96AD-7	Arctic96AD-7 sp002082305	85.47	1.23	2603265	42.9831	0.898022	2471	333	57183	7817.61	10942	0	0	0	18
SAR324_d05	Bacteria	SAR324	SAR324	SAR324	NAC60-12	Arctic96AD-7	Arctic96AD-7 sp016764995	90.79	2.4	2792117	43.003	0.898671	2672	213	66791	13108.5	20118	0	0	0	21
SAR324_d06	Bacteria	SAR324	SAR324	SAR324	NAC60-12	Arctic96AD-7	Arctic96AD-7 sp002082305	82.98	1.75	2113687	42.2347	0.901501	1971	210	45624	10065.2	12981	0	0	0	13
SAR324_d07	Bacteria	SAR324	SAR324	SAR324	NAC60-12	Arctic96AD-7	Arctic96AD-7 sp016764995	90.46	7.37	2889973	43.162	0.899559	2747	202	78687	14306.8	20931	0	0	0	19
SAR324_d08	Bacteria	SAR324	SAR324	SAR324	NAC60-12	Arctic96AD-7	Arctic96AD-7 sp016764995	82.71	7.24	2704164	43.4134	0.900967	2546	180	103191	15023.1	22608	1	0	0	20
SAR324_d09	Bacteria	SAR324	SAR324	SAR324	NAC60-12	Arctic96AD-7	Arctic96AD-7 sp002082305	89.33	1.12	2501104	42.6171	0.904133	2378	355	48127	7045.36	11147	0	0	0	17
SAR324_d10	Bacteria	SAR324	SAR324	SAR324	NAC60-12	Arctic96AD-7	Arctic96AD-7 sp016764995	86.64	1.99	2708230	43.0146	0.900596	2654	263	39857	10297.5	15052	0	0	0	17
UBA8108_1501	Bacteria	Planctomycetota	UBA8108	UBA8108	UBA8108	UBA8108	Unknown	56.85	3.37	2949442	60.3297	0.927102	2968	1110	14783	2657.15	2827	1	0	0	6
UBA8108_1502	Bacteria	Planctomycetota	UBA8108	UBA8108	UBA8108	UBA8108	Unknown	83.54	2.33	3669534	60.3533	0.924294	3249	786	27377	4668.62	5602	1	0	0	27
UBA8108_501	Bacteria	Planctomycetota	UBA8108	UBA8108	UBA8108	UBA8108	UBA8108 sp002708465	79.36	2.78	3526123	60.1955	0.924979	3795	1577	13602	2235.97	2468	0	1	0	12
UBA8108_502	Bacteria	Planctomycetota	UBA8108	UBA8108	UBA8108	UBA8108	UBA8108 sp002708465	64.67	4.44	3113466	60.2057	0.924365	3564	1630	10276	1910.1	2004	0	0	0	9
UBA890_501	Bacteria	Acidobacteriota	UBA890	UBA890	UBA890	UBA890	Unknown	68.67	7.49	2452172	54.8362	0.93045	2457	536	23750	4574.95	4785	1	1	1	30
Verru_1501	Bacteria	Verrucomicrobiota	Verrucomicrobiae	Pedosphaerales	UBA1096	UBA1096	UBA1096 sp015658765	93.31	0.75	3375287	59.8432	0.935856	3222	846	26150	3989.7	5037	0	0	1	27
Verru_1502	Bacteria	Verrucomicrobiota	Verrucomicrobiae	Pedosphaerales	UBA1096	UBA1096	UBA1096 sp015658765	88.49	1.08	3394070	59.7068	0.93824	2998	607	38916	5591.55	7196	0	0	0	27
Verru_1503	Bacteria	Verrucomicrobiota	Verrucomicrobiae	Pedosphaerales	UBA1096	UBA1096	UBA1096 sp015658765	88.95	1.93	3288332	59.8513	0.940142	2934	678	30652	4850.05	6176	0	0	0	26
Verru_1504	Bacteria	Verrucomicrobiota	Verrucomicrobiae	Pedosphaerales	UBA1096	UBA1096	UBA1096 sp015658765	86.54	0.5	3233403	60.1228	0.93919	2853	658	34170	4913.99	6322	0	1	1	27
Verru_1505	Bacteria	Verrucomicrobiota	Verrucomicrobiae	Pedosphaerales	UBA1096	UBA1096	UBA1096 sp015658765	84.3	0.73	3007020	60.36	0.939613	2686	556	47844	5408.31	7013	0	0	1	25
Verru_1506	Bacteria	Verrucomicrobiota	Verrucomicrobiae	Pedosphaerales	UBA1096	UBA1096	UBA1096 sp015658765	83.27	0.98	3136868	59.9344	0.934761	2887	553	30149	5672.46	7546	0	0	0	32
Verru_1507	Bacteria	Verrucomicrobiota	Verrucomicrobiae	Pedosphaerales	UBA1096	UBA1096	UBA1096 sp015658765	90.92	0.9	3557652	59.5891	0.936117	3187	830	29573	4286.33	5749	0	0	1	26
Verru_201	Bacteria	Verrucomicrobiota	Verrucomicrobiae	Pedosphaerales	UBA1096	UBA1096	Unknown	62.35	4.99	2708418	59.0202	0.935722	3175	1353	10495	2001.79	2144	0	0	0	13
Verru_202	Bacteria	Verrucomicrobiota	Verrucomicrobiae	Pedosphaerales	UBA1096	UBA1096	Unknown	84.01	3.26	3438819	59.4412	0.941373	3266	1026	28736	3351.68	4235	0	0	0	23
Verru_203	Bacteria	Verrucomicrobiota	Verrucomicrobiae	Pedosphaerales	UBA1096	UBA1096	Unknown	80.02	1.5	3161339	59.6373	0.9367	3095	898	20727	3520.42	4344	0	1	1	27
Verru_204	Bacteria	Verrucomicrobiota	Verrucomicrobiae	Pedosphaerales	UBA1100	JACNJL01	Unknown	54.45	7.31	1858424	56.7732	0.942757	2483	1062	8887	1749.93	1780	0	0	0	4
Verru_205	Bacteria	Verrucomicrobiota	Verrucomicrobiae	Pedosphaerales	UBA1096	UBA1096	UBA1096 sp015658765	92.68	1.02	3423181	59.5215	0.93951	3170	809	27203	4231.37	5873	0	0	0	28
Verru_206	Bacteria	Verrucomicrobiota	Verrucomicrobiae	Pedosphaerales	UBA1096	UBA1096	Unknown	81.61	1.26	3125224	59.5473	0.937514	3185	1007	15190	3103.5	3833	0	0	0	17
Verru_207	Bacteria	Verrucomicrobiota	Verrucomicrobiae	Pedosphaerales	UBA1096	UBA1096	UBA1096 sp015658765	82	3.09	3326749	59.392	0.940091	3213	916	21730	3631.82	4607	0	0	0	29
Verru_208	Bacteria	Verrucomicrobiota	Verrucomicrobiae	Pedosphaerales	UBA1100	JACNJL01	Unknown	90.93	4.42	2957852	55.7773	0.947339	2974	670	32035	4414.7	5690	0	0	0	30
Verru_209	Bacteria	Verrucomicrobiota	Verrucomicrobiae	Opitutales	MB11C04	GCA-2730975	Unknown	73.96	1	2852282	53.0197	0.939766	3185	1186	17000	2404.96	2655	0	0	0	13
Verru_210	Bacteria	Verrucomicrobiota	Verrucomicrobiae	Verrucomicrobiales	Akkermansiaceae	Roseibacillus_B	Unknown	92.74	7.18	5041328	58.9601	0.898276	4920	1193	44460	4225.76	6981	1	0	1	31
Verru_211	Bacteria	Verrucomicrobiota	Verrucomicrobiae	Opitutales	MB11C04	GCA-2730975	Unknown	75.3	3.47	3044834	52.4745	0.940574	3477	1333	11732	2284.2	2520	0	0	0	8
Verru_212	Bacteria	Verrucomicrobiota	Verrucomicrobiae	Pedosphaerales	UBA1100	JACNJL01	Unknown	81.57	4.5	2455657	55.9489	0.944139	2889	965	15045	2544.72	2919	1	0	0	23
Verru_213	Bacteria	Verrucomicrobiota	Verrucomicrobiae	Opitutales	MB11C04	GCA-2730975	Unknown	81.07	4.23	3091750	52.5815	0.938015	3265	955	20046	3237.43	3863	0	1	0	17
Verru_214	Bacteria	Verrucomicrobiota	Verrucomicrobiae	Pedosphaerales	UBA1100	JACNJL01	Unknown	86	5.76	2923753	55.9906	0.946612	3053	832	18745	3514.13	4633	0	0	0	28
Verru_215	Bacteria	Verrucomicrobiota	Verrucomicrobiae	Pedosphaerales	UBA1096	UBA1096	UBA1096 sp015658765	82.58	2.78	3505610	59.4072	0.939208	3163	829	24223	4228.72	5569	0	0	0	26
Verru_216	Bacteria	Verrucomicrobiota	Verrucomicrobiae	Pedosphaerales	UBA1096	UBA1096	UBA1096 sp015658765	94.6	0.96	3304527	59.8773	0.935885	2824	413	50736	8001.28	11551	0	0	1	34
Verru_217	Bacteria	Verrucomicrobiota	Verrucomicrobiae	Verrucomicrobiales	Akkermansiaceae	Roseibacillus_B	Unknown	70.13	2.35	3995776	58.9908	0.896364	4217	1349	16770	2962.03	3375	0	0	0	22
Verru_218	Bacteria	Verrucomicrobiota	Verrucomicrobiae	Pedosphaerales	UBA1100	JACNJL01	Unknown	73.56	4.55	2038180	56.7522	0.940865	2638	1141	8567	1786.31	1818	0	0	0	6
Verru_219	Bacteria	Verrucomicrobiota	Verrucomicrobiae	Pedosphaerales	UBA1096	UBA1096	Unknown	91.52	5.15	3577374	59.3129	0.939391	3505	1058	27933	3381.26	4355	0	0	0	25
Verru_501	Bacteria	Verrucomicrobiota	Verrucomicrobiae	Pedosphaerales	UBA1096	UBA1096	UBA1096 sp015658765	85.9	7	3393526	60.6728	0.934026	3257	801	68271	4236.61	10314	0	0	1	28
Verru_502	Bacteria	Verrucomicrobiota	Verrucomicrobiae	Pedosphaerales	UBA1096	UBA1096	UBA1096 sp015658765	83.25	0.42	2853115	60.2652	0.940288	2442	330	40505	8645.8	11015	0	0	0	27
Verru_503	Bacteria	Verrucomicrobiota	Verrucomicrobiae	Pedosphaerales	UBA1096	UBA1096	Unknown	81.45	2.71	3335689	59.4269	0.937724	3133	759	34454	4394.85	5556	0	0	0	28
Verru_504	Bacteria	Verrucomicrobiota	Verrucomicrobiae	Pedosphaerales	UBA1096	UBA1096	UBA1096 sp015658765	89.42	1.47	3264302	59.635	0.934875	3044	696	41143	4690.09	6037	0	0	0	27
Verru_505	Bacteria	Verrucomicrobiota	Verrucomicrobiae	Pedosphaerales	UBA1096	UBA1096	Unknown	85.19	7.54	3233420	59.6191	0.935988	3328	1029	15497	3142.29	3839	0	0	0	22
Verru_506	Bacteria	Verrucomicrobiota	Verrucomicrobiae	Pedosphaerales	UBA1096	UBA1096	UBA1096 sp015658765	90.82	0.93	3576116	59.4905	0.942224	3141	769	37802	4650.35	6481	0	0	0	31
Verru_507	Bacteria	Verrucomicrobiota	Verrucomicrobiae	Pedosphaerales	UBA1100	JACNJL01	Unknown	56.41	5.15	1708592	56.9537	0.948816	2268	1030	6958	1658.83	1666	0	0	0	2
Verru_508	Bacteria	Verrucomicrobiota	Verrucomicrobiae	Pedosphaerales	UBA1096	UBA1096	UBA1096 sp015658765	93.15	0.45	3763629	59.1697	0.935281	3220	536	49172	7021.7	10469	0	1	1	36
Verru_509	Bacteria	Verrucomicrobiota	Verrucomicrobiae	Pedosphaerales	UBA1096	UBA1096	UBA1096 sp015658765	89.17	0.28	3630252	59.1853	0.93657	3053	523	53056	6941.21	10076	0	1	1	35
Verru_510	Bacteria	Verrucomicrobiota	Verrucomicrobiae	Opitutales	MB11C04	GCA-2730975	Unknown	82.77	3.27	3071340	52.8943	0.941539	3428	1243	19984	2470.91	2822	0	0	0	14
Verru_511	Bacteria	Verrucomicrobiota	Verrucomicrobiae	Pedosphaerales	UBA1100	JACNJL01	Unknown	64.02	1.03	1393348	56.405	0.951749	1471	307	13804	4538.59	4679	0	0	0	16
Verru_512	Bacteria	Verrucomicrobiota	Verrucomicrobiae	Pedosphaerales	UBA1100	JACNJL01	Unknown	51.01	1.41	1918551	55.6871	0.953131	1941	531	13786	3613.09	3884	0	0	0	12
Verru_513	Bacteria	Verrucomicrobiota	Verrucomicrobiae	Verrucomicrobiales	Akkermansiaceae	Roseibacillus_B	Unknown	69.92	1.19	3622963	58.9843	0.898452	4090	1590	12407	2278.59	2512	0	0	0	18
Verru_514	Bacteria	Verrucomicrobiota	Verrucomicrobiae	Pedosphaerales	UBA1096	UBA1096	UBA1096 sp015658765	81.07	0.09	2907288	60.1569	0.935964	2511	344	37406	8451.42	10664	0	0	0	34
Verru_515	Bacteria	Verrucomicrobiota	Verrucomicrobiae	Pedosphaerales	UBA1096	UBA1096	UBA1096 sp015658765	81	0.23	2740944	60.5581	0.937835	2395	349	39280	7853.71	9777	0	0	0	26
Verru_516	Bacteria	Verrucomicrobiota	Verrucomicrobiae	Pedosphaerales	UBA1096	UBA1096	Unknown	79.39	6.02	3330492	59.2817	0.939214	3460	1207	16329	2759.31	3354	0	0	0	23
Verru_517	Bacteria	Verrucomicrobiota	Verrucomicrobiae	Pedosphaerales	UBA1096	UBA1096	UBA1096 sp015658765	93.63	1.32	3648995	59.4266	0.939694	3148	625	36391	5838.39	8579	0	0	0	31
Verru_d01	Bacteria	Verrucomicrobiota	Verrucomicrobiae	Pedosphaerales	UBA1100	JACNJL01	Unknown	64.82	9.63	2322563	58.8078	0.94621	3015	1334	6440	1741.05	1755	0	0	0	7
Verru_d02	Bacteria	Verrucomicrobiota	Verrucomicrobiae	Verrucomicrobiales	Akkermansiaceae	Roseibacillus_B	Unknown	92.16	0.42	5470326	60.832	0.90375	4573	544	44093	10055.7	13909	0	1	0	25
Verru_d03	Bacteria	Verrucomicrobiota	Verrucomicrobiae	Verrucomicrobiales	Akkermansiaceae	Roseibacillus_B	Unknown	88.06	2.92	4869541	60.8816	0.904513	4694	1219	27355	3994.7	4966	0	0	0	19
Verru_d04	Bacteria	Verrucomicrobiota	Verrucomicrobiae	Pedosphaerales	UBA1096	UBA1096	UBA1096 sp015658765	71.75	0.13	2719812	59.9923	0.932903	2352	300	86129	9066.04	14382	0	0	0	26
Verru_d05	Bacteria	Verrucomicrobiota	Verrucomicrobiae	Verrucomicrobiales	Akkermansiaceae	Roseibacillus_B	Unknown	83.44	3.64	5313277	60.9204	0.904504	4575	624	65581	8514.87	11271	0	1	0	31

## Sheet: Supp. Table 3 SeqCode
Table S3. Nomenclature of taxa proposed in this study, registered under the SeqCode Registry as register list XXXXX.
Domain	Phylum	Class	Order	Etymology*	Description*	Family	Etymology*	Description*	Genus	Etymology*	Description*	Species	Etymology	Description	Genome
Bacteria	Pseudomonadota (syn. "Proteobacteria")	Gammaproteobacteria	Pseudomonadales	-	-	Porticoccaceae	-	-	Aecorimicrobium	Ae.co.ri.mi.cro'bi.um L. neut. n. aecor, sea or ocean; N.L. neut. n. microbium, a microbe; N.L. neut. n. Aecorimicrobium, a microbe from the sea	This genus is also known by the GTDB placeholder name HTCC2207. All genomes currently known to belong to this genus were derived from marine or estuarine metagenomic samples. The nomenclatural type for the genus is the species Aecorimicrobium marmum.	Aecorimicrobium marmum	mar'mum L. neut. adj. marmum, marine or belonging to the ocean	Genomes belonging to this species have a GC content of approximately 45.6 %. The genomes recovered for this species range between 2.27 and 3.36 Mb. Most genes for glycolysis and the tricarboxylic acid (TCA) cycle is encoded by genomes of this species, with the TCA cycle functioning via the glyoxylate shunt. A ferric ion substrate binding protein for an ABC transporter is also encoded by the genom…	Gamma_203
															Gamma_230
			Woeseiales	-	-	Woeseiaceae	-	-	Marinivivens	Ma.ri.ni.vi'vens L. masc. adj. marinus, marine; L. pres. part. vivens, living; N.L. masc. n. Marinivivens, a microbe living in the ocean	This genus is also known by the GTDB placeholder name SP4260. All known genomes belonging to the genus has been recovered from marine metagenomes globally. The nomenclatural type for the genus is the species Marinivivens meridionalipontus.	Marinivivens meridionalipontus	me.ri.di.o.na.li.pon'tus L. masc. adj. meridionalis, southern; L. masc. n. pontus, sea; N.L. masc. adj. meridionalipontus, of the southern seas	The genome serving as nomenclatural type for this species was recovered from samples from the Southern Ocean. The GC content for the nomenclatural type is 37.6 % and is approximately 2 Mb in size. Most genes for glycolysis is present in the genome, with genes coding for the TCA cycle via the glyoxylate shunt encoded. A substrate binding subunit of a ferric ion ABC transporter is also encoded by t…	Gamma_236
			Oceanirimantales	O.ce.a.ni.ri.man.ta'les L. masc. n. Oceanirimans, a microbe exploring the ocean; -ales, ending to denote an order; N.L. fem. n. Oceanirimantales, the order of the genus Oceanirimans	This taxon is also known by the GTDB order placeholder name SAR86. The description for the order as for the family Oceanirimantaceae. The nomenclatural type for the order is the genus Oceanirimans.	Oceanirimantaceae	O.ce.a.ni.ri.man.ta'ce.ae L. masc. n. Oceanirimans, a microbe exploring the ocean; -aceae, ending to denote family; N.L. fem. n. Oceanirimantaceae, the family of the genus Oceanirimans	This taxon is also known by the GTDB family placeholder name SAR86. All genomes known to belong to this family are derived from marine and brackish water samples. The nomenclatural type for the family is the genus Oceanirimans.	Oceanirimans	O.ce.a.ni.ri'mans L. masc. n. oceanus, ocean; L. pres. part. rimans, exploring; N.L. masc. n. Oceanirimans, a microbe exploring the ocean	This taxon is also known by its GTDB genus placeholder name AEGEAN-183. All genomes known to belong to the genus are derived from marine and hydrothermal vent metagenomic samples. Where indicated, most marine water samples were taken from the mesopelagic zone between 500 m and 1000 m. The nomenclatural type for the genus is the species Oceanirimans austrimarmus.	Oceanirimans austrimarmus	aus.tri.mar'mus L. masc. n. auster, south; L. masc. adj. marmus, marine or belonging to the sea; N.L. masc. adj. austrimarmus, belonging to the south seas, where the type genome was recovered from	The genome serving as nomenclatural type for this species was recovered from samples taken at 500 m depth in the Southern Ocean. The GC content for known genomes of this species range between 36.9% and 37.3 % and is approximately 1.3 - 1.49 Mb in size. The genomes of the species had variable presence for glycolysis, the TCA cycle with the glyoxylate shunt, and aerobic respiration. Genes for the M…	Gamma_534
															Gamma_525
			Incertae sedis	-	-	Pseudothioglobaceae	-	-	Pseudothioglobus	-	-	Pseudothioglobus notiaecoris	no.ti.ae.co'ris Gr. fem. n. nótios, south; L. neut. n. aecor, ocean; N.L. gen. n. notiaecoris, of the ocean of the south	Both genomes belonging to this species were recovered from abyssopelagic marine water samples at approximately 4200 m depth, from the Southern Ocean. The GC content for genomes of this species are approximately 36.7% and the genomes range between 1.36 and 1.4 Mb in size. Most genes for glycolysis and aerobic respiration are encoded by the genomes. Genes for carbon fixation through the Calvin-Bens…	Gamma_d05
															Gamma_d29
	Verrucomicrobiota	Lentisphaeria	Marmibacteriales	Mar.mi.bac.te.ri.a'les N.L. neut. n. Marmibacterium, a bacterium belonging to the sea; -ales, ending to denote an order; N.L. fem. n. Marmibacteriales, the order of the genus Marmibacterium	This taxon is also known by the GTDB order placeholder name JABSQK01. Genomes belonging to this order has been recovered from oxic and anoxic water at varying depths from shallow to abyssopelagic marine water samples, subsea tunnel biofilms, and from marine sponges. The type for the order is the genus Marmibacterium.	Marmibacteriaceae	Mar.mi.bac.te.ri.a'ce.ae N.L. neut. n. Marmibacterium, a bacterium belonging to the sea; -aceae, ending to denote family; N.L. fem. n. Marmibacteriaceae, the family of the genus Marmibacterium	The description for the family is the same as for the genus Marmibacterium. The nomenclatural type for the family is the genus Marmibacterium.	Marmibacterium	Mar.mi.bac.te.ri'um L. masc. adj. marmus, marine or belonging to the sea; N.L. neut. n. bacterium, a bacterium; N.L. neut. n. Marmibacterium, a bacterium belonging to the sea	The description for the genus is the same as for the type species Marmibacterium austelloceanicum.	Marmibacterium austelloceanicum	aus.tel.lo.ce.a.ni'cum L. masc. n. austellus, south; L. neut. adj. oceanicum, of the ocean; N.L. neut. adj. austelloceanicum, of the ocean of the south	The genome of this species was recovered from a metagenomic sample at 200 m depth in the Southern Ocean. The GC content for the type genome of this species is 57.87% with a genome size of 4.58 Mb. The genome of this species encode some genes required for glycolysis, aerobic respiration, the TCA cycle, and the Entner-Doudoroff pathway. Genes for nitrite reduction and sulfur assimilation are presen…	Lenti_201
			Limisphaerales	-	-	Imbricolaceae	Im.bri.co.la'ce.ae N.L. fem. n. Imbricola, a water inhabitant; -aceae, ending to denote a family; N.L. fem. n. Imbricolaceae, the family of the genus Imbricola	This taxon is also known by the GTDB family placeholder name UBA1100. Genomes belonging to this family has been recovered from marine and freshwater samples. The nomenclatural type for the family is the genus Imbricola.	Imbricola	Im.bri.co'la L. masc. n. imber, water; L. fem. n. suff. -cola, inhabitant; N.L. fem. n. Imbricola, a water inhabitant	This taxon is also known by the GTDB genus placeholder name UBA1100. All genomes known to belong to this genus have been recovered from marine water and marine water from coral reefs. The type for the genus is the species Imbricola austellimarma.	Imbricola austellimarma	aus.tel.li.mar'ma L. masc. n. austellus, south; L. fem. adj. marma, sea; N.L. fem. adj. austellimarma, of the sea of the south	Genomes belonging to this species were recovered from samples from 200 m in depth from the Southern Ocean. The GC content of the type genomeis 55.78%, with genome size estimates at ~ 3 Mb. This genome has partial presence for genes coding for glycolysis. This species is likely motile as genes encoding flagella are present in the type genome. The substrate-binding subunit of a ferrous ion transpor…	Verru_208
			Verrucomicrobiales	-	-	Akkermansiaceae	-	-	Fretispirans	Fre.ti.spi'rans L. neut. n. fretum, sea; L. pres. part. spirans, living; N.L. fem. n. Fretispirans, a microbe living in the sea	This genus is also known by the GTDB placeholder name Roseibacillus_B. All genomes known to belong to the genus were recovered from marine water including water from a hydrothermal plume, a sea sponge, and from sea sand. The type for the genus is the species Fretispirans austraecoris.	Fretispirans austraecoris	L. masc. n. auster, south; L. neut. n. aecor, ocean; N.L. gen. n. austraecoris, of the southern ocean	The type genome for this species was recovered from the Southern Ocean at 4200 m depth. The GC content of this genome is 60.83% and the genome size is approximately 5.5 Mb. Most genes coding for glycolysis, the TCA cycle, and the Entner-Doudoroff pathway are encoded in the type genome. Several components of an aerobic respiratory chain is encoded by the genome. Likely capable of dissimilatory sul…	Verru_d02
* If proposed in this study

## Sheet: Supp. Table 4
MAG ID	Reference genome	ANI (%)	FastANI alignment fraction	Reference taxonomy
Cyano_201	GCF_014279835.1	91.7921	0.97254	d__Bacteria;p__Cyanobacteriota;c__Cyanobacteriia;o__PCC-6307;f__Cyanobiaceae;g__Synechococcus_C;s__Synechococcus_C sp014279835
Dehal_206	GCA_014239685.1	93.1465	0.797583	d__Bacteria;p__Chloroflexota;c__Dehalococcoidia;o__UBA1151;f__UBA1151;g__GCA-2730555;s__GCA-2730555 sp014239685
Dehal_210	GCA_022451885.1	94.8438	0.766871	d__Bacteria;p__Chloroflexota;c__Dehalococcoidia;o__Tepidiformales;f__Tepidiformaceae;g__JAKUNN01;s__JAKUNN01 sp022451885
Dehal_212	GCA_014239685.1	93.4467	0.827684	d__Bacteria;p__Chloroflexota;c__Dehalococcoidia;o__UBA1151;f__UBA1151;g__GCA-2730555;s__GCA-2730555 sp014239685
Dehal_504	GCA_014239685.1	93.4448	0.849265	d__Bacteria;p__Chloroflexota;c__Dehalococcoidia;o__UBA1151;f__UBA1151;g__GCA-2730555;s__GCA-2730555 sp014239685
Dehal_505	GCA_014239685.1	93.1614	0.839721	d__Bacteria;p__Chloroflexota;c__Dehalococcoidia;o__UBA1151;f__UBA1151;g__GCA-2730555;s__GCA-2730555 sp014239685
Gamma_1527	GCA_002698045.1	94.6101	0.660714	d__Bacteria;p__Pseudomonadota;c__Gammaproteobacteria;o__PS1;f__Thioglobaceae;g__Pseudothioglobus;s__Pseudothioglobus sp002698045
Gamma_203	GCA_002382445.1	88.3744	0.795804	d__Bacteria;p__Pseudomonadota;c__Gammaproteobacteria;o__Pseudomonadales;f__Porticoccaceae;g__HTCC2207;s__HTCC2207 sp002382445
Gamma_212	GCA_012965075.1	94.8252	0.672269	d__Bacteria;p__Pseudomonadota;c__Gammaproteobacteria;o__SAR86;f__SAR86;g__AEGEAN-183;s__AEGEAN-183 sp012965075
Gamma_213	GCA_012965075.1	93.7593	0.744928	d__Bacteria;p__Pseudomonadota;c__Gammaproteobacteria;o__SAR86;f__SAR86;g__AEGEAN-183;s__AEGEAN-183 sp012965075
Gamma_219	GCA_002457215.1	93.8455	0.889577	d__Bacteria;p__Pseudomonadota;c__Gammaproteobacteria;o__Pseudomonadales;f__Pseudohongiellaceae;g__UBA9145;s__UBA9145 sp002457215
Gamma_230	GCA_002382445.1	88.2292	0.81	d__Bacteria;p__Pseudomonadota;c__Gammaproteobacteria;o__Pseudomonadales;f__Porticoccaceae;g__HTCC2207;s__HTCC2207 sp002382445
Gamma_503	GCA_015660645.1	83.6588	0.675159	d__Bacteria;p__Pseudomonadota;c__Gammaproteobacteria;o__SAR86;f__SAR86;g__CAJJAM01;s__CAJJAM01 sp015660645
Gamma_525	GCA_012965075.1	93.856	0.831884	d__Bacteria;p__Pseudomonadota;c__Gammaproteobacteria;o__SAR86;f__SAR86;g__AEGEAN-183;s__AEGEAN-183 sp012965075
Gamma_534	GCA_012965075.1	93.8205	0.788406	d__Bacteria;p__Pseudomonadota;c__Gammaproteobacteria;o__SAR86;f__SAR86;g__AEGEAN-183;s__AEGEAN-183 sp012965075
Gamma_d01	GCA_012960345.1	93.7805	0.621622	d__Bacteria;p__Pseudomonadota;c__Gammaproteobacteria;o__Arenicellales;f__UBA868;g__UBA11791;s__UBA11791 sp012960345
Gamma_d05	GCA_002698045.1	94.2234	0.8125	d__Bacteria;p__Pseudomonadota;c__Gammaproteobacteria;o__PS1;f__Thioglobaceae;g__Pseudothioglobus;s__Pseudothioglobus sp002698045
Gamma_d20	GCA_002698045.1	94.0565	0.727679	d__Bacteria;p__Pseudomonadota;c__Gammaproteobacteria;o__PS1;f__Thioglobaceae;g__Pseudothioglobus;s__Pseudothioglobus sp002698045
Gamma_d29	GCA_002698045.1	94.1463	0.808036	d__Bacteria;p__Pseudomonadota;c__Gammaproteobacteria;o__PS1;f__Thioglobaceae;g__Pseudothioglobus;s__Pseudothioglobus sp002698045
Gemma_204	GCA_002501085.1	90.033	0.914062	d__Bacteria;p__Gemmatimonadota;c__Gemmatimonadetes;o__Longimicrobiales;f__UBA6960;g__UBA1138;s__UBA1138 sp002501085
Lenti_201	GCA_913042885.1	91.1773	0.719968	d__Bacteria;p__Verrucomicrobiota;c__Lentisphaeria;o__JABSQK01;f__CAJWLW01;g__CAJWLW01;s__CAJWLW01 sp913042885
Nitros_204	GCA_905182935.1	93.2612	0.641935	d__Bacteria;p__Nitrospinota;c__Nitrospinia;o__Nitrospinales;f__Nitrospinaceae;g__Nitromaritima;s__Nitromaritima sp905182935
Planc_203	GCA_012965455.1	87.334	0.835088	d__Bacteria;p__Planctomycetota;c__Planctomycetia;o__Pirellulales;f__Pirellulaceae;g__UBA721;s__UBA721 sp012965455
Planc_501	GCA_012965455.1	88.4171	0.913043	d__Bacteria;p__Planctomycetota;c__Planctomycetia;o__Pirellulales;f__Pirellulaceae;g__UBA721;s__UBA721 sp012965455
Posei_1506	GCA_002506485.1	94.5368	0.837989	d__Archaea;p__Thermoplasmatota;c__Poseidoniia;o__MGIII;f__CG-Epi1;g__CG-Epi1;s__CG-Epi1 sp002506485
Posei_1515	GCA_015658585.1	94.006	0.611399	d__Archaea;p__Thermoplasmatota;c__Poseidoniia;o__MGIII;f__CG-Epi1;g__CG-Epi1;s__CG-Epi1 sp015658585
Posei_207	GCA_002495735.1	92.7158	0.828383	d__Archaea;p__Thermoplasmatota;c__Poseidoniia;o__Poseidoniales;f__Thalassarchaeaceae;g__Thalassarchaeum;s__Thalassarchaeum sp002495735
Posei_210	GCA_002495735.1	92.7892	0.75	d__Archaea;p__Thermoplasmatota;c__Poseidoniia;o__Poseidoniales;f__Thalassarchaeaceae;g__Thalassarchaeum;s__Thalassarchaeum sp002495735
Posei_218	GCA_023700255.1	87.6084	0.866295	d__Archaea;p__Thermoplasmatota;c__Poseidoniia;o__Poseidoniales;f__Thalassarchaeaceae;g__MGIIb-O2;s__MGIIb-O2 sp023700255
Posei_227	GCA_014240255.1	88.6755	0.806167	d__Archaea;p__Thermoplasmatota;c__Poseidoniia;o__MGIII;f__CG-Epi1;g__CG-Epi1;s__CG-Epi1 sp014240255
Posei_228	GCA_012960975.1	94.6103	0.974138	d__Archaea;p__Thermoplasmatota;c__Poseidoniia;o__Poseidoniales;f__Thalassarchaeaceae;g__MGIIb-O2;s__MGIIb-O2 sp004195525
Posei_510	GCA_014240255.1	88.4563	0.791304	d__Archaea;p__Thermoplasmatota;c__Poseidoniia;o__MGIII;f__CG-Epi1;g__CG-Epi1;s__CG-Epi1 sp014240255
Posei_513	GCA_002495735.1	93.1547	0.751462	d__Archaea;p__Thermoplasmatota;c__Poseidoniia;o__Poseidoniales;f__Thalassarchaeaceae;g__Thalassarchaeum;s__Thalassarchaeum sp002495735
Posei_514	GCA_002495735.1	92.6435	0.78629	d__Archaea;p__Thermoplasmatota;c__Poseidoniia;o__Poseidoniales;f__Thalassarchaeaceae;g__Thalassarchaeum;s__Thalassarchaeum sp002495735
Posei_516	GCA_002495735.1	93.5696	0.734266	d__Archaea;p__Thermoplasmatota;c__Poseidoniia;o__Poseidoniales;f__Thalassarchaeaceae;g__Thalassarchaeum;s__Thalassarchaeum sp002495735
Posei_d10	GCA_002503395.1	89.9793	0.978417	d__Archaea;p__Thermoplasmatota;c__Poseidoniia;o__Poseidoniales;f__Poseidoniaceae;g__UBA60;s__UBA60 sp002503395
Posei_d15	GCA_012959845.1	90.4631	0.774403	d__Archaea;p__Thermoplasmatota;c__Poseidoniia;o__Poseidoniales;f__Poseidoniaceae;g__MGIIa-L1;s__MGIIa-L1 sp012959845
Posei_d20	GCA_012959845.1	94.087	0.826722	d__Archaea;p__Thermoplasmatota;c__Poseidoniia;o__Poseidoniales;f__Poseidoniaceae;g__MGIIa-L1;s__MGIIa-L1 sp012959845
UBA8108_1501	GCA_002708465.1	94.209	0.596639	d__Bacteria;p__Planctomycetota;c__UBA8108;o__UBA8108;f__UBA8108;g__UBA8108;s__UBA8108 sp002708465
UBA8108_1502	GCA_002708465.1	93.7555	0.586121	d__Bacteria;p__Planctomycetota;c__UBA8108;o__UBA8108;f__UBA8108;g__UBA8108;s__UBA8108 sp002708465
UBA890_501	GCA_002722645.1	91.4345	0.615665	d__Bacteria;p__Acidobacteriota;c__UBA890;o__UBA890;f__UBA890;g__UBA890;s__UBA890 sp002722645
Verru_201	GCA_015658765.1	93.0054	0.553299	d__Bacteria;p__Verrucomicrobiota;c__Verrucomicrobiae;o__Pedosphaerales;f__UBA1096;g__UBA1096;s__UBA1096 sp015658765
Verru_202	GCA_015658765.1	94.8391	0.592105	d__Bacteria;p__Verrucomicrobiota;c__Verrucomicrobiae;o__Pedosphaerales;f__UBA1096;g__UBA1096;s__UBA1096 sp015658765
Verru_203	GCA_015658765.1	94.4331	0.565789	d__Bacteria;p__Verrucomicrobiota;c__Verrucomicrobiae;o__Pedosphaerales;f__UBA1096;g__UBA1096;s__UBA1096 sp015658765
Verru_204	GCA_015660155.1	86.6276	0.670213	d__Bacteria;p__Verrucomicrobiota;c__Verrucomicrobiae;o__Pedosphaerales;f__UBA1100;g__JACNJL01;s__JACNJL01 sp015660155
Verru_206	GCA_015658765.1	94.4588	0.517857	d__Bacteria;p__Verrucomicrobiota;c__Verrucomicrobiae;o__Pedosphaerales;f__UBA1096;g__UBA1096;s__UBA1096 sp015658765
Verru_208	GCA_015660155.1	86.6171	0.638672	d__Bacteria;p__Verrucomicrobiota;c__Verrucomicrobiae;o__Pedosphaerales;f__UBA1100;g__JACNJL01;s__JACNJL01 sp015660155
Verru_209	GCA_014382645.1	89.3339	0.762658	d__Bacteria;p__Verrucomicrobiota;c__Verrucomicrobiae;o__Opitutales;f__MB11C04;g__GCA-2730975;s__GCA-2730975 sp014382645
Verru_211	GCA_014382645.1	89.3355	0.823529	d__Bacteria;p__Verrucomicrobiota;c__Verrucomicrobiae;o__Opitutales;f__MB11C04;g__GCA-2730975;s__GCA-2730975 sp014382645
Verru_212	GCA_015660155.1	86.9952	0.616129	d__Bacteria;p__Verrucomicrobiota;c__Verrucomicrobiae;o__Pedosphaerales;f__UBA1100;g__JACNJL01;s__JACNJL01 sp015660155
Verru_213	GCA_014382645.1	89.5461	0.766082	d__Bacteria;p__Verrucomicrobiota;c__Verrucomicrobiae;o__Opitutales;f__MB11C04;g__GCA-2730975;s__GCA-2730975 sp014382645
Verru_214	GCA_015660155.1	86.6339	0.582031	d__Bacteria;p__Verrucomicrobiota;c__Verrucomicrobiae;o__Pedosphaerales;f__UBA1100;g__JACNJL01;s__JACNJL01 sp015660155
Verru_218	GCA_015660155.1	87.2899	0.652174	d__Bacteria;p__Verrucomicrobiota;c__Verrucomicrobiae;o__Pedosphaerales;f__UBA1100;g__JACNJL01;s__JACNJL01 sp015660155
Verru_219	GCA_015658765.1	94.9773	0.609023	d__Bacteria;p__Verrucomicrobiota;c__Verrucomicrobiae;o__Pedosphaerales;f__UBA1096;g__UBA1096;s__UBA1096 sp015658765
Verru_503	GCA_015658765.1	94.7669	0.667293	d__Bacteria;p__Verrucomicrobiota;c__Verrucomicrobiae;o__Pedosphaerales;f__UBA1096;g__UBA1096;s__UBA1096 sp015658765
Verru_505	GCA_015658765.1	94.5776	0.579848	d__Bacteria;p__Verrucomicrobiota;c__Verrucomicrobiae;o__Pedosphaerales;f__UBA1096;g__UBA1096;s__UBA1096 sp015658765
Verru_507	GCA_015660155.1	86.3812	0.666667	d__Bacteria;p__Verrucomicrobiota;c__Verrucomicrobiae;o__Pedosphaerales;f__UBA1100;g__JACNJL01;s__JACNJL01 sp015660155
Verru_510	GCA_014382645.1	89.6901	0.786486	d__Bacteria;p__Verrucomicrobiota;c__Verrucomicrobiae;o__Opitutales;f__MB11C04;g__GCA-2730975;s__GCA-2730975 sp014382645
Verru_511	GCA_015660155.1	86.5647	0.625387	d__Bacteria;p__Verrucomicrobiota;c__Verrucomicrobiae;o__Pedosphaerales;f__UBA1100;g__JACNJL01;s__JACNJL01 sp015660155
Verru_512	GCA_015660155.1	86.2806	0.509915	d__Bacteria;p__Verrucomicrobiota;c__Verrucomicrobiae;o__Pedosphaerales;f__UBA1100;g__JACNJL01;s__JACNJL01 sp015660155
Verru_516	GCA_015658765.1	94.1048	0.546371	d__Bacteria;p__Verrucomicrobiota;c__Verrucomicrobiae;o__Pedosphaerales;f__UBA1096;g__UBA1096;s__UBA1096 sp015658765
Verru_d01	GCA_015660155.1	94.5653	0.71028	d__Bacteria;p__Verrucomicrobiota;c__Verrucomicrobiae;o__Pedosphaerales;f__UBA1100;g__JACNJL01;s__JACNJL01 sp015660155
Alpha_202	no result	no result	no result	no result
Crenar_1502	no result	no result	no result	no result
Crenar_1503	no result	no result	no result	no result
Crenar_1504	no result	no result	no result	no result
Crenar_1505	no result	no result	no result	no result
Crenar_203	no result	no result	no result	no result
Dehal_201	no result	no result	no result	no result
Dehal_204	no result	no result	no result	no result
Dehal_209	no result	no result	no result	no result
Gamma_1516	no result	no result	no result	no result
Gamma_1526	no result	no result	no result	no result
Gamma_201	no result	no result	no result	no result
Gamma_216	no result	no result	no result	no result
Gamma_226	no result	no result	no result	no result
Gamma_233	no result	no result	no result	no result
Gamma_234	no result	no result	no result	no result
Gamma_236	no result	no result	no result	no result
Gamma_238	no result	no result	no result	no result
Gamma_239	no result	no result	no result	no result
Gamma_505	no result	no result	no result	no result
Gamma_520	no result	no result	no result	no result
Gamma_521	no result	no result	no result	no result
Gamma_526	no result	no result	no result	no result
Gamma_540	no result	no result	no result	no result
Gamma_542	no result	no result	no result	no result
Gamma_547	no result	no result	no result	no result
Gamma_553	no result	no result	no result	no result
Gamma_562	no result	no result	no result	no result
Gamma_d07	no result	no result	no result	no result
Gemma_505	no result	no result	no result	no result
Gemma_d03	no result	no result	no result	no result
Myxoc_201	no result	no result	no result	no result
Phyci_d01	no result	no result	no result	no result
Planc_503	no result	no result	no result	no result
Posei_508	no result	no result	no result	no result
Posei_519	no result	no result	no result	no result
Posei_d11	no result	no result	no result	no result
Verru_210	no result	no result	no result	no result
Verru_217	no result	no result	no result	no result
Verru_513	no result	no result	no result	no result
Verru_d02	no result	no result	no result	no result
Verru_d03	no result	no result	no result	no result
Verru_d05	no result	no result	no result	no result

## Sheet: Supp. Table 5
MAG	Taxonomy							Carbohydrate-Active enZymes (CAZymes)
	Domain	Phylum	Class	Order	Family	Genus	Species	Alpha-galactans	Alpha-mannan	Amorphous Cellulose	Arabinan	Arabinose cleavage	Beta-mannan	Chitin	Crystalline Cellulose	Fucose Cleavage	Mixed-Linkage glucans	Pectin	Polyphenolics	Rhamnose cleavage	Starch	Sulf-Polysachharides	Xylans	Xyloglucan
Acidi_1501	Bacteria	Actinobacteriota	Acidimicrobiia	Microtrichales	MedAcidi-G1	S20-B6	S20-B6sp002699725	0	0	0	0	1	0	0	0	0	0	0	0	0	0	0	0	0
Acidi_1502	Bacteria	Actinobacteriota	Acidimicrobiia	Microtrichales	MedAcidi-G1	S20-B6	S20-B6sp002699725	0	0	0	0	1	0	0	0	0	0	0	0	0	0	0	0	0
Acidi_1503	Bacteria	Actinobacteriota	Acidimicrobiia	Microtrichales	MedAcidi-G1	S20-B6	S20-B6sp002699725	0	0	0	0	1	0	0	0	0	0	0	0	0	0	0	0	0
Acidi_1504	Bacteria	Actinobacteriota	Acidimicrobiia	Microtrichales	MedAcidi-G1	S20-B6	S20-B6sp002699725	0	0	0	0	1	0	0	0	0	0	0	0	0	0	0	0	0
Acidi_1505	Bacteria	Actinobacteriota	Acidimicrobiia	Microtrichales	TK06	UBA2110	UBA2110sp002331465	0	0	0	0	0	0	0	0	0	0	0	0	0	0	0	0	0
Acidi_1506	Bacteria	Actinobacteriota	Acidimicrobiia	Microtrichales	MedAcidi-G1	S20-B6	S20-B6sp002699725	0	0	0	0	0	0	0	0	0	0	0	0	0	0	0	0	0
Acidi_1507	Bacteria	Actinobacteriota	Acidimicrobiia	Microtrichales	MedAcidi-G1	unknown	unknown	0	0	0	0	1	0	0	0	0	0	0	0	0	0	0	0	1
Acidi_201	Bacteria	Actinobacteriota	Acidimicrobiia	Microtrichales	MedAcidi-G1	UBA9410	unknown	0	0	0	0	0	0	0	0	0	0	0	1	0	0	0	0	0
Acidi_202	Bacteria	Actinobacteriota	Acidimicrobiia	Microtrichales	MedAcidi-G1	UBA9410	unknown	0	0	0	0	0	0	0	0	0	0	0	0	0	0	0	0	0
Acidi_203	Bacteria	Actinobacteriota	Acidimicrobiia	Microtrichales	MedAcidi-G1	S20-B6	S20-B6sp002699725	0	0	0	0	0	0	0	0	0	0	0	0	0	0	0	0	0
Acidi_204	Bacteria	Actinobacteriota	Acidimicrobiia	Microtrichales	MedAcidi-G1	UBA9410	unknown	0	0	0	0	1	0	0	0	0	0	0	1	0	0	0	0	0
Acidi_205	Bacteria	Actinobacteriota	Acidimicrobiia	Microtrichales	TK06	UBA9040	unknown	0	0	0	0	1	0	0	0	0	0	0	0	0	0	0	0	0
Acidi_206	Bacteria	Actinobacteriota	Acidimicrobiia	Microtrichales	TK06	UBA2110	UBA2110sp002331465	0	0	0	0	0	0	0	0	0	0	0	0	0	0	0	0	0
Acidi_207	Bacteria	Actinobacteriota	Acidimicrobiia	Microtrichales	MedAcidi-G1	S20-B6	S20-B6sp002699725	0	0	0	0	0	0	0	0	0	0	0	0	0	0	0	0	0
Acidi_208	Bacteria	Actinobacteriota	Acidimicrobiia	Microtrichales	MedAcidi-G1	UBA9410	unknown	0	0	0	0	1	0	0	0	0	0	0	1	0	0	0	0	0
Acidi_210	Bacteria	Actinobacteriota	Acidimicrobiia	Microtrichales	MedAcidi-G1	UBA9410	unknown	0	0	0	0	1	0	0	0	0	0	0	0	0	0	0	0	0
Acidi_211	Bacteria	Actinobacteriota	Acidimicrobiia	Microtrichales	TK06	UBA2110	UBA2110sp002331465	0	0	0	0	0	0	0	0	0	0	0	0	0	0	0	0	0
Acidi_212	Bacteria	Actinobacteriota	Acidimicrobiia	Microtrichales	TK06	UBA2110	UBA2110sp002331465	0	0	0	0	1	0	0	0	0	0	1	0	0	0	0	0	0
Acidi_213	Bacteria	Actinobacteriota	Acidimicrobiia	Microtrichales	MedAcidi-G1	UBA9410	unknown	0	0	0	0	0	0	0	0	0	0	0	0	0	0	0	0	0
Acidi_214	Bacteria	Actinobacteriota	Acidimicrobiia	Microtrichales	MedAcidi-G1	UBA9410	unknown	0	0	0	0	1	0	0	0	0	0	0	0	0	0	0	0	0
Acidi_215	Bacteria	Actinobacteriota	Acidimicrobiia	Microtrichales	MedAcidi-G1	S20-B6	S20-B6sp002699725	0	0	0	0	1	0	0	0	0	0	0	0	0	0	0	0	0
Acidi_216	Bacteria	Actinobacteriota	Acidimicrobiia	Microtrichales	MedAcidi-G1	UBA9410	unknown	0	0	0	0	1	0	0	0	0	0	0	0	0	0	0	0	0
Acidi_217	Bacteria	Actinobacteriota	Acidimicrobiia	Microtrichales	MedAcidi-G1	UBA9410	unknown	0	0	0	0	1	0	0	0	0	0	0	1	0	0	0	0	0
Acidi_218	Bacteria	Actinobacteriota	Acidimicrobiia	Microtrichales	MedAcidi-G1	UBA9410	unknown	0	0	0	0	1	0	0	0	0	0	0	0	0	0	0	0	0
Acidi_219	Bacteria	Actinobacteriota	Acidimicrobiia	Microtrichales	MedAcidi-G1	S20-B6	S20-B6sp002699725	0	0	0	0	1	0	0	0	0	0	0	0	0	0	0	0	0
Acidi_220	Bacteria	Actinobacteriota	Acidimicrobiia	Microtrichales	MedAcidi-G1	UBA9410	unknown	0	0	0	0	1	0	0	0	0	0	0	0	0	0	0	0	0
Acidi_221	Bacteria	Actinobacteriota	Acidimicrobiia	Microtrichales	MedAcidi-G1	UBA9410	unknown	0	0	0	0	0	0	0	0	0	0	0	1	0	0	0	0	0
Acidi_222	Bacteria	Actinobacteriota	Acidimicrobiia	Microtrichales	MedAcidi-G1	S20-B6	S20-B6sp002699725	0	0	0	0	1	0	0	0	0	0	0	0	0	0	0	0	0
Acidi_223	Bacteria	Actinobacteriota	Acidimicrobiia	Microtrichales	MedAcidi-G1	UBA9410	unknown	0	0	0	0	1	0	0	0	0	0	0	0	0	0	0	0	0
Acidi_224	Bacteria	Actinobacteriota	Acidimicrobiia	Microtrichales	TK06	UBA2110	UBA2110sp002331465	0	0	0	0	1	0	0	0	0	0	0	0	0	0	0	0	0
Acidi_225	Bacteria	Actinobacteriota	Acidimicrobiia	Microtrichales	MedAcidi-G1	S20-B6	S20-B6sp002699725	0	0	0	0	1	0	0	0	0	0	0	0	0	0	0	0	0
Acidi_226	Bacteria	Actinobacteriota	Acidimicrobiia	Microtrichales	TK06	UBA2110	UBA2110sp002331465	0	0	0	0	1	0	0	0	0	0	0	0	0	0	0	0	0
Acidi_227	Bacteria	Actinobacteriota	Acidimicrobiia	Microtrichales	MedAcidi-G1	S20-B6	S20-B6sp002699725	0	0	0	0	1	0	0	0	0	0	0	0	0	0	0	0	0
Acidi_228	Bacteria	Actinobacteriota	Acidimicrobiia	Microtrichales	TK06	UBA2110	UBA2110sp002331465	0	0	0	0	1	0	0	0	0	0	0	0	0	0	0	0	0
Acidi_229	Bacteria	Actinobacteriota	Acidimicrobiia	Microtrichales	MedAcidi-G1	S20-B6	S20-B6sp002699725	0	0	0	0	1	0	0	0	0	0	0	0	0	0	0	0	0
Acidi_230	Bacteria	Actinobacteriota	Acidimicrobiia	Microtrichales	MedAcidi-G1	UBA9410	unknown	0	0	0	0	1	0	0	0	0	0	0	1	0	0	0	0	0
Acidi_231	Bacteria	Actinobacteriota	Acidimicrobiia	Microtrichales	TK06	UBA2110	UBA2110sp002331465	0	0	0	0	1	0	0	0	0	0	0	0	0	0	0	0	0
Acidi_501	Bacteria	Actinobacteriota	Acidimicrobiia	Microtrichales	MedAcidi-G1	S20-B6	S20-B6sp002699725	0	0	0	0	1	0	0	0	0	0	0	0	0	0	0	0	0
Acidi_502	Bacteria	Actinobacteriota	Acidimicrobiia	Microtrichales	TK06	UBA2110	UBA2110sp002331465	0	0	0	0	1	0	0	0	0	0	0	0	0	0	0	0	0
Acidi_503	Bacteria	Actinobacteriota	Acidimicrobiia	Microtrichales	MedAcidi-G1	S20-B6	S20-B6sp002699725	0	0	0	0	1	0	0	0	0	0	0	0	0	0	0	0	0
Acidi_504	Bacteria	Actinobacteriota	Acidimicrobiia	Microtrichales	TK06	UBA2110	UBA2110sp002331465	0	0	0	0	1	0	0	0	0	0	0	0	0	0	0	0	0
Acidi_505	Bacteria	Actinobacteriota	Acidimicrobiia	Microtrichales	TK06	UBA2110	UBA2110sp002331465	0	0	0	0	1	0	0	0	0	0	0	0	0	0	0	0	1
Acidi_506	Bacteria	Actinobacteriota	Acidimicrobiia	Microtrichales	MedAcidi-G1	S20-B6	S20-B6sp002699725	0	0	0	0	1	0	0	0	0	0	0	0	0	0	0	0	0
Acidi_507	Bacteria	Actinobacteriota	Acidimicrobiia	Microtrichales	MedAcidi-G1	S20-B6	S20-B6sp002699725	0	0	0	0	1	0	0	0	0	0	0	0	0	0	0	0	0
Acidi_508	Bacteria	Actinobacteriota	Acidimicrobiia	Microtrichales	TK06	UBA2110	UBA2110sp002331465	0	0	0	0	1	0	0	0	0	0	0	0	0	0	0	0	0
Acidi_509	Bacteria	Actinobacteriota	Acidimicrobiia	Microtrichales	TK06	UBA2110	UBA2110sp002331465	0	0	0	0	0	0	0	0	0	0	0	0	0	0	0	0	0
Acidi_510	Bacteria	Actinobacteriota	Acidimicrobiia	Microtrichales	MedAcidi-G1	S20-B6	S20-B6sp002699725	0	0	0	0	1	0	0	0	0	0	0	0	0	0	0	0	0
Acidi_511	Bacteria	Actinobacteriota	Acidimicrobiia	Microtrichales	MedAcidi-G1	UBA9410	unknown	0	0	0	0	1	0	0	0	0	0	0	1	0	0	0	0	0
Acidi_512	Bacteria	Actinobacteriota	Acidimicrobiia	Microtrichales	MedAcidi-G1	UBA9410	unknown	0	0	0	0	1	0	0	0	0	0	0	1	0	0	0	0	0
Acidi_513	Bacteria	Actinobacteriota	Acidimicrobiia	Microtrichales	MedAcidi-G1	UBA9410	unknown	0	0	0	0	1	0	0	0	0	0	0	0	0	0	0	0	0
Acidi_514	Bacteria	Actinobacteriota	Acidimicrobiia	Microtrichales	MedAcidi-G1	S20-B6	S20-B6sp002699725	0	0	0	0	1	0	0	0	0	0	0	0	0	0	0	0	0
Acidi_515	Bacteria	Actinobacteriota	Acidimicrobiia	Microtrichales	MedAcidi-G1	S20-B6	S20-B6sp002699725	0	0	0	0	1	0	0	0	0	0	0	0	0	0	0	0	0
Acidi_516	Bacteria	Actinobacteriota	Acidimicrobiia	Microtrichales	MedAcidi-G1	UBA9410	unknown	0	0	0	0	1	0	0	0	0	0	0	1	0	0	0	0	0
Acidi_517	Bacteria	Actinobacteriota	Acidimicrobiia	Microtrichales	TK06	UBA2110	UBA2110sp002331465	0	0	0	0	1	0	0	0	0	0	0	0	0	0	0	0	0
Acidi_518	Bacteria	Actinobacteriota	Acidimicrobiia	Microtrichales	MedAcidi-G1	UBA9410	unknown	0	0	0	0	1	0	0	0	0	0	0	0	0	0	0	0	0
Acidi_519	Bacteria	Actinobacteriota	Acidimicrobiia	Microtrichales	MedAcidi-G1	S20-B6	S20-B6sp002699725	0	0	0	0	1	0	0	0	0	0	0	0	0	0	0	0	0
Acidi_520	Bacteria	Actinobacteriota	Acidimicrobiia	Microtrichales	TK06	UBA2110	UBA2110sp002331465	0	0	0	0	1	0	0	0	0	0	0	0	0	0	0	0	0
Acidi_521	Bacteria	Actinobacteriota	Acidimicrobiia	Microtrichales	MedAcidi-G1	UBA9410	unknown	0	0	0	0	1	0	0	0	0	0	0	0	0	0	0	0	0
Acidi_522	Bacteria	Actinobacteriota	Acidimicrobiia	Microtrichales	MedAcidi-G1	UBA9410	unknown	0	0	0	0	1	0	0	0	0	0	0	1	0	0	0	0	0
Acidi_523	Bacteria	Actinobacteriota	Acidimicrobiia	Microtrichales	MedAcidi-G1	S20-B6	S20-B6sp002699725	0	0	0	0	1	0	0	0	0	0	0	0	0	0	0	0	0
Acidi_524	Bacteria	Actinobacteriota	Acidimicrobiia	Microtrichales	TK06	UBA2110	UBA2110sp002331465	0	0	0	0	1	0	0	0	0	0	0	0	0	0	0	0	0
Acidi_525	Bacteria	Actinobacteriota	Acidimicrobiia	Microtrichales	MedAcidi-G1	S20-B6	S20-B6sp002699725	0	0	0	0	1	0	0	0	0	0	0	0	0	0	0	0	0
Acidi_526	Bacteria	Actinobacteriota	Acidimicrobiia	Microtrichales	TK06	UBA2110	UBA2110sp002331465	0	0	0	0	0	0	0	0	0	0	0	0	0	0	0	0	0
Acidi_527	Bacteria	Actinobacteriota	Acidimicrobiia	Microtrichales	TK06	UBA2110	UBA2110sp002331465	0	0	0	0	1	0	0	0	0	0	0	0	0	0	0	0	0
Acidi_528	Bacteria	Actinobacteriota	Acidimicrobiia	Microtrichales	MedAcidi-G1	UBA9410	unknown	0	0	0	0	1	0	0	0	0	0	0	1	0	0	0	0	0
Acidi_529	Bacteria	Actinobacteriota	Acidimicrobiia	Microtrichales	TK06	UBA2110	UBA2110sp002331465	0	0	0	0	1	0	0	0	0	0	0	0	0	0	0	0	0
Acidi_530	Bacteria	Actinobacteriota	Acidimicrobiia	Microtrichales	MedAcidi-G1	UBA9410	unknown	0	0	0	0	1	0	0	0	0	0	0	0	0	0	0	0	0
Acidi_d01	Bacteria	Actinobacteriota	Acidimicrobiia	Microtrichales	MedAcidi-G1	UBA9410	unknown	0	0	0	0	1	0	0	0	0	0	0	0	0	0	0	0	0
Acidi_d02	Bacteria	Actinobacteriota	Acidimicrobiia	Microtrichales	MedAcidi-G1	UBA9410	unknown	0	0	0	0	1	0	0	0	0	0	0	1	0	0	0	0	1
Acidi_d03	Bacteria	Actinobacteriota	Acidimicrobiia	Microtrichales	MedAcidi-G1	UBA9410	unknown	0	0	0	0	1	0	0	0	0	0	0	1	0	0	0	0	0
Acidi_d04	Bacteria	Actinobacteriota	Acidimicrobiia	Microtrichales	MedAcidi-G1	UBA9410	unknown	0	0	0	0	1	0	0	0	0	0	0	1	0	0	0	0	1
Acidi_d05	Bacteria	Actinobacteriota	Acidimicrobiia	Microtrichales	MedAcidi-G1	UBA9410	unknown	0	0	0	0	1	0	0	0	0	0	0	0	0	0	0	0	0
Acidi_d06	Bacteria	Actinobacteriota	Acidimicrobiia	Microtrichales	MedAcidi-G1	UBA9410	unknown	0	0	0	0	1	0	0	0	0	0	0	1	0	0	0	0	0
Alpha_1501	Bacteria	Proteobacteria	Alphaproteobacteria	Rhodospirillales_A	UBA2165	GCA-2712665	GCA-2712665sp002938035	0	0	1	0	0	0	1	0	0	1	0	1	0	0	0	1	0
Alpha_1502	Bacteria	Proteobacteria	Alphaproteobacteria	HIMB59	GCA-002718135	MarineAlpha5-Bin3	unknown	0	0	0	0	0	0	0	0	0	0	1	0	0	0	0	0	0
Alpha_1503	Bacteria	Proteobacteria	Alphaproteobacteria	Rhodospirillales_A	Casp-alpha2	Casp-alpha2	Casp-alpha2sp002938075	0	0	0	0	0	0	0	0	0	0	0	0	0	0	0	0	0
Alpha_201	Bacteria	Proteobacteria	Alphaproteobacteria	Rhodobacterales	Rhodobacteraceae	GCA-2697345	unknown	0	0	0	0	0	0	1	0	0	0	0	1	0	0	0	0	0
Alpha_202	Bacteria	Proteobacteria	Alphaproteobacteria	Rhizobiales	TMED25	MED-G09	unknown	0	0	0	0	0	0	0	0	0	0	0	0	0	0	0	0	0
Marin_d03	Bacteria	Marinisomatota	Marinisomatia	SCGC-AAA003-L08	unknown	unknown	unknown	0	0	0	0	1	0	0	0	0	0	0	0	0	0	0	0	0
Alpha_d02	Bacteria	Proteobacteria	Alphaproteobacteria	Pelagibacterales	Pelagibacteraceae	AG-414-E02	unknown	0	0	0	0	0	0	0	0	0	0	0	0	0	0	0	0	0
Alpha_d03	Bacteria	Proteobacteria	Alphaproteobacteria	Rhodospirillales_A	UBA2165	UBA2165	unknown	0	0	0	0	0	0	1	0	0	0	0	0	0	0	0	0	0
Alpha_d04	Bacteria	Proteobacteria	Alphaproteobacteria	Pelagibacterales	Pelagibacteraceae	AG-414-E02	unknown	0	0	0	0	0	0	0	0	0	0	0	1	0	0	0	0	0
Bacte_201	Bacteria	Bacteroidota	Bacteroidia	Flavobacteriales	Flavobacteriaceae	GCA-2700405	unknown	0	0	0	0	0	0	1	0	0	0	0	0	0	0	0	0	0
Bacte_202	Bacteria	Bacteroidota	Bacteroidia	Flavobacteriales	Flavobacteriaceae	GCA-2700405	unknown	0	0	0	0	0	0	1	0	1	0	0	0	0	0	0	0	0
Bacte_203	Bacteria	Bacteroidota	Bacteroidia	Flavobacteriales	Flavobacteriaceae	MED-G11	unknown	0	0	0	0	0	0	1	0	0	0	0	0	0	0	0	0	0
Bacte_501	Bacteria	Bacteroidota	Bacteroidia	Flavobacteriales	Flavobacteriaceae	MED-G11	MED-G11sp002729755	0	0	0	0	0	0	0	0	0	1	0	0	0	0	0	0	0
Bacte_502	Bacteria	Bacteroidota	Bacteroidia	Flavobacteriales	Flavobacteriaceae	GCA-2700405	unknown	0	0	0	0	1	0	1	0	1	0	0	0	0	0	0	1	1
Bacte_503	Bacteria	Bacteroidota	Bacteroidia	Flavobacteriales	Flavobacteriaceae	MAG-121220-bin8	unknown	0	0	0	0	1	0	1	0	1	1	0	0	0	0	0	0	1
Bacte_d01	Bacteria	Bacteroidota	Bacteroidia	Flavobacteriales	BACL11	TMED123	unknown	0	0	0	0	1	0	0	0	0	0	0	0	0	0	0	0	1
Bacte_d02	Bacteria	Bacteroidota	Bacteroidia	Flavobacteriales	Flavobacteriaceae	GCA-2700405	unknown	0	0	0	0	0	0	1	0	0	0	0	0	1	0	0	0	0
Crenar_1501	Archaea	Crenarchaeota	Nitrososphaeria	Nitrososphaerales	Nitrosopumilaceae	Nitrosopumilus	unknown	0	0	0	0	0	0	0	0	0	0	0	0	0	0	0	0	0
Crenar_1502	Archaea	Crenarchaeota	Nitrososphaeria	Nitrososphaerales	Nitrosopumilaceae	Nitrosopelagicus	unknown	0	0	0	0	0	0	0	0	0	0	0	0	0	0	0	0	0
Crenar_1503	Archaea	Crenarchaeota	Nitrososphaeria	Nitrososphaerales	Nitrosopumilaceae	Nitrosopelagicus	unknown	0	0	0	0	0	0	0	0	0	0	0	0	0	0	0	0	0
Crenar_1504	Archaea	Crenarchaeota	Nitrososphaeria	Nitrososphaerales	Nitrosopumilaceae	Nitrosopelagicus	unknown	0	0	0	0	0	0	0	0	0	0	0	0	0	0	0	0	0
Crenar_1505	Archaea	Crenarchaeota	Nitrososphaeria	Nitrososphaerales	Nitrosopumilaceae	Nitrosopelagicus	unknown	0	0	0	0	0	0	0	0	0	0	0	0	0	0	0	0	0
Crenar_201	Archaea	Crenarchaeota	Nitrososphaeria	Nitrososphaerales	Nitrosopumilaceae	Nitrosopumilus	unknown	0	0	0	0	0	0	0	0	0	0	0	0	0	0	0	0	0
Crenar_202	Archaea	Crenarchaeota	Nitrososphaeria	Nitrososphaerales	Nitrosopumilaceae	Nitrosopumilus	unknown	0	0	0	0	0	0	0	0	0	0	0	0	0	0	0	0	0
Crenar_501	Archaea	Crenarchaeota	Nitrososphaeria	Nitrososphaerales	Nitrosopumilaceae	Nitrosopumilus	unknown	0	0	0	0	0	0	0	0	0	0	0	0	0	0	0	0	0
Crenar_503	Archaea	Crenarchaeota	Nitrososphaeria	Nitrososphaerales	Nitrosopumilaceae	Nitrosopumilus	unknown	0	0	0	0	0	0	0	0	0	0	0	0	0	0	0	0	0
Cyano_201	Bacteria	Cyanobacteria	Cyanobacteriia	Synechococcales	Cyanobiaceae	Synechococcus_C	unknown	0	0	0	0	0	0	1	0	0	0	0	0	0	0	0	0	0
Dehal_1502	Bacteria	Chloroflexota	Dehalococcoidia	UBA1151	Bin127	UBA9455	UBA9455sp002313245	0	0	0	0	0	0	0	0	0	0	1	0	0	0	0	0	0
Dehal_1503	Bacteria	Chloroflexota	Dehalococcoidia	UBA3495	UBA3495	UBA9611	unknown	0	0	0	0	0	0	0	0	0	0	1	0	0	0	0	0	0
Dehal_1504	Bacteria	Chloroflexota	Dehalococcoidia	UBA1151	Bin127	UBA9455	UBA9455sp002313245	0	0	0	0	0	0	0	0	0	0	0	0	0	0	0	0	0
Dehal_1505	Bacteria	Chloroflexota	Dehalococcoidia	UBA3495	UBA3495	UBA9611	unknown	0	0	0	0	0	0	0	0	0	0	0	0	0	0	0	0	0
Dehal_1506	Bacteria	Chloroflexota	Dehalococcoidia	SAR202	UBA826	UBA11996	unknown	0	0	0	0	0	0	0	0	0	0	0	0	0	0	0	0	0
Dehal_1507	Bacteria	Chloroflexota	Dehalococcoidia	UBA3495	UBA3495	UBA9611	UBA9611sp002816355	0	0	0	0	0	0	0	0	0	0	1	0	0	0	0	0	0
Dehal_1508	Bacteria	Chloroflexota	Dehalococcoidia	SAR202	UBA11138	UBA1123	UBA1123sp002313895	0	0	0	0	0	0	0	0	0	0	0	0	0	0	0	0	0
Dehal_1509	Bacteria	Chloroflexota	Dehalococcoidia	UBA1151	Bin127	UBA9455	UBA9455sp002313245	0	0	0	0	0	0	0	0	0	0	1	0	0	0	0	0	0
Dehal_1510	Bacteria	Chloroflexota	Dehalococcoidia	SAR202	UBA826	UBA11996	unknown	0	0	0	0	0	0	0	0	0	0	0	0	0	0	0	0	0
Dehal_1511	Bacteria	Chloroflexota	Dehalococcoidia	UBA3495	UBA3495	UBA11650	UBA11650sp002710215	0	0	0	0	0	0	0	0	0	0	0	0	0	0	0	0	0
Dehal_1512	Bacteria	Chloroflexota	Dehalococcoidia	SAR202	UBA11138	UBA1123	UBA1123sp002313895	0	0	0	0	0	0	0	0	0	0	0	0	0	0	0	0	0
Dehal_201	Bacteria	Chloroflexota	Dehalococcoidia	UBA1151	Bin127	UBA1328	unknown	0	0	0	0	0	0	0	0	0	0	0	0	0	0	0	0	0
Dehal_202	Bacteria	Chloroflexota	Dehalococcoidia	UBA3495	UBA3495	UBA9611	unknown	0	0	0	0	0	0	0	0	0	0	0	0	0	0	0	0	0
Dehal_203	Bacteria	Chloroflexota	Dehalococcoidia	UBA3495	UBA3495	UBA9611	unknown	0	0	0	0	0	0	0	0	0	0	1	0	0	0	0	0	0
Dehal_204	Bacteria	Chloroflexota	Dehalococcoidia	UBA2979	UBA2979	UBA2979	unknown	0	0	0	0	0	0	0	0	0	0	0	0	0	0	0	0	0
Dehal_205	Bacteria	Chloroflexota	Dehalococcoidia	UBA3495	UBA3495	UBA9611	unknown	0	0	0	0	0	0	0	0	0	0	0	1	0	0	0	0	0
Dehal_206	Bacteria	Chloroflexota	Dehalococcoidia	UBA1151	UBA1151	GCA-2730555	unknown	0	0	0	0	0	0	0	0	0	0	0	0	0	0	0	0	0
Dehal_207	Bacteria	Chloroflexota	Dehalococcoidia	UBA3495	UBA3495	UBA9611	unknown	0	0	0	0	0	0	0	0	0	0	0	0	0	0	0	0	0
Dehal_208	Bacteria	Chloroflexota	Dehalococcoidia	UBA3495	UBA3495	UBA9611	unknown	0	0	0	0	0	0	0	0	0	0	0	0	0	0	0	0	0
Dehal_209	Bacteria	Chloroflexota	Dehalococcoidia	UBA2979	UBA2979	UBA2979	unknown	0	0	0	0	0	0	0	0	0	0	0	1	0	0	0	0	0
Dehal_210	Bacteria	Chloroflexota	Dehalococcoidia	UBA2991	UBA2991	UBA2991	unknown	0	0	0	0	0	1	0	0	0	0	0	0	0	0	0	0	0
Dehal_211	Bacteria	Chloroflexota	Dehalococcoidia	UBA3495	UBA3495	UBA9611	unknown	0	0	0	0	0	0	0	0	0	0	1	0	0	0	0	0	0
Dehal_212	Bacteria	Chloroflexota	Dehalococcoidia	UBA1151	UBA1151	GCA-2730555	unknown	0	0	0	0	0	0	0	0	0	0	0	0	0	0	0	0	0
Dehal_501	Bacteria	Chloroflexota	Dehalococcoidia	UBA3495	UBA3495	UBA9611	unknown	0	0	0	0	0	0	0	0	0	0	0	0	0	0	0	0	0
Dehal_502	Bacteria	Chloroflexota	Dehalococcoidia	SAR202	UBA826	UBA11996	unknown	0	0	0	0	0	0	0	0	0	0	0	0	0	0	0	0	0
Dehal_503	Bacteria	Chloroflexota	Dehalococcoidia	UBA3495	UBA3495	UBA9611	unknown	0	0	0	0	0	0	0	0	0	0	0	0	0	0	0	0	0
Dehal_504	Bacteria	Chloroflexota	Dehalococcoidia	UBA1151	UBA1151	GCA-2730555	unknown	0	0	0	0	0	0	0	0	0	0	0	0	0	0	0	0	0
Dehal_505	Bacteria	Chloroflexota	Dehalococcoidia	UBA1151	UBA1151	GCA-2730555	unknown	0	0	0	0	1	0	0	0	0	0	0	0	0	0	0	0	0
Dehal_506	Bacteria	Chloroflexota	Dehalococcoidia	UBA3495	UBA3495	UBA9611	unknown	0	0	0	0	0	0	0	0	0	0	0	0	0	0	0	0	0
Dehal_507	Bacteria	Chloroflexota	Dehalococcoidia	SAR202	UBA826	UBA11996	unknown	0	0	0	0	0	0	0	0	0	0	1	0	0	0	0	0	0
Dehal_508	Bacteria	Chloroflexota	Dehalococcoidia	UBA3495	UBA3495	UBA9611	unknown	0	0	0	0	0	0	0	0	0	0	0	0	0	0	0	0	0
Dehal_509	Bacteria	Chloroflexota	Dehalococcoidia	UBA3495	UBA3495	UBA9611	UBA9611sp002816355	0	0	0	0	0	0	0	0	0	0	1	0	0	0	0	0	0
Dehal_510	Bacteria	Chloroflexota	Dehalococcoidia	UBA3495	UBA3495	UBA9611	unknown	0	0	0	0	0	0	0	0	0	0	0	0	0	0	0	0	0
Dehal_d01	Bacteria	Chloroflexota	Dehalococcoidia	UBA3495	UBA3495	UBA9611	UBA9611sp002746355	0	0	0	0	0	0	0	0	0	0	1	0	0	0	0	0	0
Dehal_d02	Bacteria	Chloroflexota	Dehalococcoidia	UBA1151	Bin127	UBA9455	UBA9455sp002313245	0	0	0	0	0	0	0	0	0	0	0	0	0	0	0	0	0
Dehal_d03	Bacteria	Chloroflexota	Dehalococcoidia	SAR202	UBA11138	UBA1123	UBA1123sp002313895	0	0	0	0	0	0	0	0	0	0	1	0	0	0	0	0	0
Dehal_d05	Bacteria	Chloroflexota	Dehalococcoidia	UBA3495	UBA3495	UBA9611	UBA9611sp002746355	0	0	0	0	0	0	0	0	0	0	1	0	0	0	0	0	0
Dehal_d06	Bacteria	Chloroflexota	Dehalococcoidia	SAR202	UBA11138	UBA1123	UBA1123sp002313895	0	0	0	0	1	0	0	0	0	0	1	0	0	0	0	0	0
Dehal_d07	Bacteria	Chloroflexota	Dehalococcoidia	UBA3495	UBA3495	UBA11650	UBA11650sp002401285	0	0	0	0	0	0	0	0	0	0	1	0	0	0	0	0	0
Dehal_d08	Bacteria	Chloroflexota	Dehalococcoidia	UBA1151	Bin127	UBA9455	UBA9455sp002313245	0	0	0	0	0	0	0	0	0	0	0	0	0	0	0	0	0
Dehal_d09	Bacteria	Chloroflexota	Dehalococcoidia	SAR202	UBA11138	UBA1123	UBA1123sp002313895	0	0	0	0	0	0	0	0	0	0	0	0	0	0	0	0	0
Dehal_d10	Bacteria	Chloroflexota	Dehalococcoidia	UBA1151	Bin127	UBA9455	UBA9455sp002313245	0	0	0	0	0	0	0	0	0	0	0	0	0	0	0	0	0
Dehal_d11	Bacteria	Chloroflexota	Dehalococcoidia	UBA3495	UBA3495	UBA9611	UBA9611sp002746355	0	0	0	0	0	0	0	0	0	0	1	0	0	0	0	0	0
Dehal_d12	Bacteria	Chloroflexota	Dehalococcoidia	UBA3495	UBA3495	UBA11650	UBA11650sp002401285	0	0	0	0	0	0	0	0	0	0	0	0	0	0	0	0	0
Dehal_d13	Bacteria	Chloroflexota	Dehalococcoidia	UBA3495	UBA3495	UBA11650	UBA11650sp002401285	0	0	0	0	0	0	0	0	0	0	0	0	0	0	0	0	0
Dehal_d14	Bacteria	Chloroflexota	Dehalococcoidia	UBA1151	Bin127	UBA9455	UBA9455sp002313245	0	0	0	0	0	0	0	0	0	0	0	0	0	0	0	0	0
Dehal_d15	Bacteria	Chloroflexota	Dehalococcoidia	UBA3495	UBA3495	UBA9611	UBA9611sp002746355	0	0	0	0	0	0	0	0	0	0	1	0	0	0	0	0	0
Dehal_d16	Bacteria	Chloroflexota	Dehalococcoidia	UBA1151	Bin127	UBA9455	UBA9455sp002313245	0	0	0	0	0	0	0	0	0	0	0	0	0	0	0	0	0
Dehal_d17	Bacteria	Chloroflexota	Dehalococcoidia	UBA3495	UBA3495	UBA9611	UBA9611sp002746355	0	0	0	0	0	0	0	0	0	0	1	0	0	0	0	0	0
Dehal_d18	Bacteria	Chloroflexota	Dehalococcoidia	UBA3495	UBA3495	UBA9611	UBA9611sp002746355	0	0	0	0	0	0	0	0	0	0	1	0	0	0	0	0	0
DG_d01	Bacteria	TA06_A	DG-26_A	c_DG-26_A	unknown	unknown	unknown	0	0	0	0	1	1	0	0	1	0	1	1	1	0	0	0	0
Gamma_1501	Bacteria	Proteobacteria	Gammaproteobacteria	Pseudomonadales	Moraxellaceae	Psychrobacter	Psychrobactersp002836505	0	0	0	0	0	0	1	0	0	0	0	1	0	0	0	0	0
Gamma_1502	Bacteria	Proteobacteria	Gammaproteobacteria	Pseudomonadales	Pseudohongiellaceae	UBA9145	UBA9145sp002694855	0	0	0	0	0	0	1	0	0	1	0	1	0	0	0	0	0
Gamma_1503	Bacteria	Proteobacteria	Gammaproteobacteria	UBA11654	UBA11654	unknown	unknown	0	0	0	0	0	0	0	0	0	0	0	0	0	0	0	0	0
Gamma_1504	Bacteria	Proteobacteria	Gammaproteobacteria	SAR86	SAR86	AEGEAN-183	unknown	0	0	1	0	1	1	1	0	0	1	1	1	0	0	0	1	1
Gamma_1505	Bacteria	Proteobacteria	Gammaproteobacteria	Pseudomonadales	HTCC2089	UBA11889	UBA11889sp002313255	0	0	0	0	0	0	1	0	0	0	0	0	0	0	0	0	0
Gamma_1506	Bacteria	Proteobacteria	Gammaproteobacteria	Pseudomonadales	Pseudohongiellaceae	UBA9145	UBA9145sp002694855	0	0	0	0	0	0	1	0	0	0	0	1	0	0	0	0	0
Gamma_1507	Bacteria	Proteobacteria	Gammaproteobacteria	SAR86	SAR86	AEGEAN-183	unknown	0	0	0	0	0	0	1	0	0	0	0	0	0	0	0	0	0
Gamma_1508	Bacteria	Proteobacteria	Gammaproteobacteria	Pseudomonadales	HTCC2089	UBA11889	UBA11889sp002313255	0	0	0	0	0	0	1	0	0	0	0	1	0	0	0	0	0
Gamma_1509	Bacteria	Proteobacteria	Gammaproteobacteria	UBA11654	UBA11654	unknown	unknown	0	0	0	0	0	0	0	0	0	0	0	0	0	0	0	0	0
Gamma_1510	Bacteria	Proteobacteria	Gammaproteobacteria	SAR86	SAR86	AEGEAN-183	unknown	0	0	1	0	1	1	1	0	0	0	1	1	0	0	0	0	1
Gamma_1511	Bacteria	Proteobacteria	Gammaproteobacteria	Pseudomonadales	Pseudohongiellaceae	UBA9145	UBA9145sp002694855	0	0	0	0	0	0	1	0	0	0	0	1	0	0	0	0	0
Gamma_1512	Bacteria	Proteobacteria	Gammaproteobacteria	Pseudomonadales	Pseudohongiellaceae	UBA9145	UBA9145sp002694855	0	0	0	0	0	0	1	0	0	0	0	1	0	0	0	0	0
Gamma_1513	Bacteria	Proteobacteria	Gammaproteobacteria	Pseudomonadales	HTCC2089	UBA11889	UBA11889sp002313255	0	0	0	0	0	0	1	0	0	0	0	1	0	0	0	0	0
Gamma_1514	Bacteria	Proteobacteria	Gammaproteobacteria	UBA11654	UBA11654	unknown	unknown	0	0	0	0	0	0	0	0	0	0	0	0	0	0	0	0	0
Gamma_1515	Bacteria	Proteobacteria	Gammaproteobacteria	SAR86	SAR86	AEGEAN-183	unknown	0	0	1	0	0	0	0	0	0	1	0	1	0	0	0	1	0
Gamma_1516	Bacteria	Proteobacteria	Gammaproteobacteria	UBA11654	UBA11654	unknown	unknown	0	0	0	0	0	0	0	0	0	0	0	1	0	0	0	0	0
Gamma_1517	Bacteria	Proteobacteria	Gammaproteobacteria	Pseudomonadales	HTCC2089	UBA11889	UBA11889sp002313255	0	0	1	0	0	0	1	0	0	0	0	1	0	0	0	0	0
Gamma_1518	Bacteria	Proteobacteria	Gammaproteobacteria	Pseudomonadales	Halomonadaceae	Halomonas	unknown	0	0	0	0	0	0	0	0	0	0	0	1	0	0	0	0	0
Gamma_1519	Bacteria	Proteobacteria	Gammaproteobacteria	UBA11654	UBA11654	unknown	unknown	0	0	0	0	0	0	0	0	0	0	0	0	0	0	0	0	0
Gamma_1520	Bacteria	Proteobacteria	Gammaproteobacteria	Pseudomonadales	Pseudohongiellaceae	UBA9145	UBA9145sp002694855	0	0	0	0	0	0	1	0	0	0	0	1	0	0	0	0	0
Gamma_1521	Bacteria	Proteobacteria	Gammaproteobacteria	Pseudomonadales	Halomonadaceae	Halomonas	Halomonasaquamarina	0	0	0	0	0	0	1	0	0	0	0	1	0	0	0	0	0
Gamma_1522	Bacteria	Proteobacteria	Gammaproteobacteria	Enterobacterales	Alteromonadaceae	Alteromonas	Alteromonasnaphthalenivorans	0	0	1	0	0	0	1	0	0	1	0	1	0	0	1	1	1
Gamma_1523	Bacteria	Proteobacteria	Gammaproteobacteria	Pseudomonadales	Pseudohongiellaceae	UBA9145	UBA9145sp002694855	0	0	0	0	0	0	1	0	0	0	0	1	0	0	0	0	0
Gamma_1524	Bacteria	Proteobacteria	Gammaproteobacteria	Pseudomonadales	HTCC2089	UBA11889	UBA11889sp002313255	0	0	1	0	0	0	1	0	0	0	0	0	0	0	0	0	0
Gamma_1525	Bacteria	Proteobacteria	Gammaproteobacteria	SAR86	SAR86	AEGEAN-183	unknown	0	0	1	0	0	0	1	0	0	1	0	1	0	0	0	1	0
Gamma_1526	Bacteria	Proteobacteria	Gammaproteobacteria	UBA11654	UBA11654	unknown	unknown	0	0	0	0	0	0	0	0	0	0	0	1	0	0	0	0	0
Gamma_1527	Bacteria	Proteobacteria	Gammaproteobacteria	Thiomicrospirales	Thioglobaceae	Thioglobus	unknown	0	0	0	0	0	0	0	0	0	0	0	0	0	0	0	0	0
Gamma_1528	Bacteria	Proteobacteria	Gammaproteobacteria	UBA11654	UBA11654	unknown	unknown	0	0	0	0	0	0	0	0	0	0	0	0	0	0	0	0	0
Gamma_1529	Bacteria	Proteobacteria	Gammaproteobacteria	Pseudomonadales	Pseudohongiellaceae	UBA9145	UBA9145sp002731775	0	0	0	0	0	0	1	0	0	0	0	1	0	0	0	0	0
Gamma_201	Bacteria	Proteobacteria	Gammaproteobacteria	UBA11654	UBA11654	unknown	unknown	0	0	0	0	1	0	0	0	0	0	0	1	0	0	0	0	0
Gamma_202	Bacteria	Proteobacteria	Gammaproteobacteria	Pseudomonadales	Pseudohongiellaceae	UBA9145	unknown	0	0	0	0	0	0	1	0	0	0	0	1	0	0	0	0	0
Gamma_203	Bacteria	Proteobacteria	Gammaproteobacteria	Pseudomonadales	Porticoccaceae	HTCC2207	unknown	0	0	1	0	1	1	1	0	0	1	1	1	0	0	0	1	1
Gamma_204	Bacteria	Proteobacteria	Gammaproteobacteria	Pseudomonadales	HTCC2089	UBA9659	unknown	0	0	0	0	0	0	0	0	0	0	0	0	0	0	0	0	0
Gamma_206	Bacteria	Proteobacteria	Gammaproteobacteria	Pseudomonadales	Pseudohongiellaceae	UBA9145	unknown	0	0	0	0	0	0	0	0	0	0	0	1	0	0	0	0	0
Gamma_207	Bacteria	Proteobacteria	Gammaproteobacteria	UBA10353	LS-SOB	REDSEA-S09-B13	REDSEA-S09-B13sp002456995	0	0	0	0	0	0	0	0	0	0	0	0	0	0	0	0	0
Gamma_209	Bacteria	Proteobacteria	Gammaproteobacteria	UBA10353	LS-SOB	REDSEA-S09-B13	REDSEA-S09-B13sp002456995	0	0	0	0	0	0	0	0	0	0	0	0	0	0	0	0	0
Gamma_210	Bacteria	Proteobacteria	Gammaproteobacteria	Pseudomonadales	Alcanivoracaceae	Alcanivorax	Alcanivoraxsp000155615	0	0	0	0	0	0	0	0	0	0	0	1	0	0	0	0	0
Gamma_211	Bacteria	Proteobacteria	Gammaproteobacteria	UBA10353	LS-SOB	REDSEA-S09-B13	REDSEA-S09-B13sp002456995	0	0	0	0	0	0	0	0	0	0	0	0	0	0	0	0	0
Gamma_212	Bacteria	Proteobacteria	Gammaproteobacteria	SAR86	SAR86	AEGEAN-183	unknown	0	0	1	0	0	0	1	0	0	1	0	1	0	0	0	1	0
Gamma_213	Bacteria	Proteobacteria	Gammaproteobacteria	SAR86	SAR86	AEGEAN-183	unknown	0	0	0	0	0	0	0	0	0	0	0	1	0	0	0	0	0
Gamma_214	Bacteria	Proteobacteria	Gammaproteobacteria	UBA10353	LS-SOB	REDSEA-S09-B13	REDSEA-S09-B13sp002456995	0	0	0	0	0	0	0	0	0	0	0	0	0	0	0	0	0
Gamma_215	Bacteria	Proteobacteria	Gammaproteobacteria	UBA10353	LS-SOB	REDSEA-S09-B13	REDSEA-S09-B13sp002456995	0	0	0	0	0	0	0	0	0	0	0	0	0	0	0	0	0
Gamma_216	Bacteria	Proteobacteria	Gammaproteobacteria	UBA11654	UBA11654	unknown	unknown	0	0	0	0	0	0	0	0	1	0	0	1	0	0	0	0	0
Gamma_217	Bacteria	Proteobacteria	Gammaproteobacteria	UBA10353	LS-SOB	REDSEA-S09-B13	REDSEA-S09-B13sp002456995	0	0	0	0	0	0	0	0	0	0	0	0	0	0	0	0	0
Gamma_218	Bacteria	Proteobacteria	Gammaproteobacteria	UBA10353	LS-SOB	UBA5682	unknown	0	0	0	0	0	0	0	0	0	0	0	0	1	0	0	0	0
Gamma_219	Bacteria	Proteobacteria	Gammaproteobacteria	Pseudomonadales	Pseudohongiellaceae	UBA9145	unknown	0	0	0	0	0	0	1	0	0	0	1	1	0	0	0	0	0
Gamma_220	Bacteria	Proteobacteria	Gammaproteobacteria	SAR86	SAR86	AEGEAN-183	unknown	0	0	1	0	0	0	1	0	0	1	0	0	0	0	0	1	0
Gamma_221	Bacteria	Proteobacteria	Gammaproteobacteria	UBA10353	LS-SOB	REDSEA-S09-B13	unknown	0	0	0	0	0	0	0	0	0	0	0	0	0	0	0	0	0
Gamma_222	Bacteria	Proteobacteria	Gammaproteobacteria	Pseudomonadales	Pseudohongiellaceae	UBA9145	UBA9145sp002712055	0	0	0	0	0	0	0	0	0	0	0	1	0	0	0	0	0
Gamma_223	Bacteria	Proteobacteria	Gammaproteobacteria	Pseudomonadales	Pseudohongiellaceae	UBA9145	unknown	0	0	0	0	0	0	1	0	0	0	0	1	0	0	0	0	0
Gamma_224	Bacteria	Proteobacteria	Gammaproteobacteria	UBA10353	LS-SOB	GCA-2726415	unknown	0	0	0	0	0	0	0	0	0	0	0	0	0	0	0	0	0
Gamma_225	Bacteria	Proteobacteria	Gammaproteobacteria	Pseudomonadales	HTCC2089	UBA9659	unknown	0	0	0	0	1	0	1	0	0	0	1	0	0	0	0	0	0
Gamma_226	Bacteria	Proteobacteria	Gammaproteobacteria	Woeseiales	Woeseiaceae	GCA-002728725	unknown	0	0	1	0	0	0	0	0	0	1	0	1	0	0	0	1	0
Gamma_227	Bacteria	Proteobacteria	Gammaproteobacteria	Pseudomonadales	Porticoccaceae	HTCC2207	unknown	0	0	0	0	0	0	0	0	0	0	0	0	0	0	0	0	0
Gamma_228	Bacteria	Proteobacteria	Gammaproteobacteria	Pseudomonadales	HTCC2089	UBA9659	unknown	0	0	0	0	1	0	1	0	0	0	0	0	0	0	0	0	0
Gamma_229	Bacteria	Proteobacteria	Gammaproteobacteria	Pseudomonadales	Pseudohongiellaceae	UBA9145	unknown	0	0	0	0	0	0	1	0	0	0	0	1	0	0	0	0	0
Gamma_230	Bacteria	Proteobacteria	Gammaproteobacteria	Pseudomonadales	Porticoccaceae	HTCC2207	unknown	0	0	1	0	1	1	1	0	0	1	1	1	0	0	0	1	1
Gamma_231	Bacteria	Proteobacteria	Gammaproteobacteria	UBA10353	LS-SOB	REDSEA-S09-B13	REDSEA-S09-B13sp002456995	0	0	0	0	0	0	0	0	0	0	0	0	0	0	0	0	0
Gamma_232	Bacteria	Proteobacteria	Gammaproteobacteria	Pseudomonadales	Pseudohongiellaceae	UBA9145	unknown	0	0	0	0	0	0	1	0	0	0	0	1	0	0	0	0	0
Gamma_233	Bacteria	Proteobacteria	Gammaproteobacteria	UBA11654	UBA11654	unknown	unknown	0	0	0	0	0	0	0	0	0	0	0	1	0	0	0	0	0
Gamma_234	Bacteria	Proteobacteria	Gammaproteobacteria	UBA11654	UBA11654	unknown	unknown	0	0	0	0	1	0	0	0	0	0	0	0	0	0	0	0	0
Gamma_235	Bacteria	Proteobacteria	Gammaproteobacteria	UBA10353	LS-SOB	GCA-2726415	unknown	0	0	0	0	0	0	0	0	0	0	0	0	0	0	0	0	0
Gamma_236	Bacteria	Proteobacteria	Gammaproteobacteria	Woeseiales	Woeseiaceae	GCA-002728725	unknown	0	0	1	0	0	0	0	0	0	1	0	1	0	0	0	1	0
Gamma_237	Bacteria	Proteobacteria	Gammaproteobacteria	UBA10353	LS-SOB	REDSEA-S09-B13	REDSEA-S09-B13sp002456995	0	0	0	0	0	0	0	0	0	0	0	0	0	0	0	0	0
Gamma_238	Bacteria	Proteobacteria	Gammaproteobacteria	UBA11654	UBA11654	unknown	unknown	0	0	0	0	0	0	0	0	0	0	0	1	0	0	0	0	0
Gamma_239	Bacteria	Proteobacteria	Gammaproteobacteria	UBA11654	UBA11654	unknown	unknown	0	0	0	0	0	0	0	0	0	0	0	1	0	0	0	0	0
Gamma_240	Bacteria	Proteobacteria	Gammaproteobacteria	UBA10353	LS-SOB	REDSEA-S09-B13	REDSEA-S09-B13sp002456995	0	0	0	0	0	0	0	0	0	0	0	0	0	0	0	0	0
Gamma_501	Bacteria	Proteobacteria	Gammaproteobacteria	Pseudomonadales	Alcanivoracaceae	Alcanivorax	Alcanivoraxsp000155615	0	0	0	0	0	0	1	0	0	0	0	1	0	0	0	0	0
Gamma_502	Bacteria	Proteobacteria	Gammaproteobacteria	Enterobacterales	Alteromonadaceae	Pseudoalteromonas	Pseudoalteromonasagarivorans	1	0	1	0	1	0	1	0	0	1	1	1	0	1	1	1	1
Gamma_503	Bacteria	Proteobacteria	Gammaproteobacteria	SAR86	SAR86	unknown	unknown	0	0	0	0	0	0	1	0	0	0	0	0	0	0	0	0	0
Gamma_504	Bacteria	Proteobacteria	Gammaproteobacteria	UBA11654	UBA11654	unknown	unknown	0	0	0	0	0	0	0	0	0	0	0	0	0	0	0	0	0
Gamma_505	Bacteria	Proteobacteria	Gammaproteobacteria	UBA11654	UBA11654	unknown	unknown	0	0	0	0	0	0	0	0	0	0	0	1	0	0	0	0	0
Gamma_506	Bacteria	Proteobacteria	Gammaproteobacteria	UBA10353	LS-SOB	REDSEA-S09-B13	REDSEA-S09-B13sp002456995	0	0	0	0	0	0	0	0	0	0	0	0	0	0	0	0	0
Gamma_507	Bacteria	Proteobacteria	Gammaproteobacteria	Pseudomonadales	HTCC2089	UBA9659	unknown	0	0	0	0	1	0	1	0	0	0	1	1	0	0	0	0	0
Gamma_508	Bacteria	Proteobacteria	Gammaproteobacteria	Pseudomonadales	Pseudohongiellaceae	UBA9145	unknown	0	0	0	0	0	0	1	0	0	0	0	1	0	0	0	0	0
Gamma_509	Bacteria	Proteobacteria	Gammaproteobacteria	Pseudomonadales	Alcanivoracaceae	Alcanivorax	Alcanivoraxsp000155615	0	0	0	0	0	0	1	0	0	0	0	1	0	0	0	0	0
Gamma_510	Bacteria	Proteobacteria	Gammaproteobacteria	Enterobacterales	Alteromonadaceae	Pseudoalteromonas	Pseudoalteromonasagarivorans	1	0	1	0	1	0	1	0	0	1	1	1	0	1	1	1	1
Gamma_511	Bacteria	Proteobacteria	Gammaproteobacteria	Pseudomonadales	HTCC2089	UBA9659	unknown	0	0	0	0	1	0	1	0	0	0	1	1	0	0	0	0	1
Gamma_512	Bacteria	Proteobacteria	Gammaproteobacteria	Pseudomonadales	Pseudohongiellaceae	UBA9145	unknown	0	0	0	0	0	0	1	0	0	0	1	1	0	0	0	0	0
Gamma_513	Bacteria	Proteobacteria	Gammaproteobacteria	UBA10353	LS-SOB	REDSEA-S09-B13	REDSEA-S09-B13sp002456995	0	0	0	0	0	0	0	0	0	0	0	0	0	0	0	0	0
Gamma_514	Bacteria	Proteobacteria	Gammaproteobacteria	UBA11654	UBA11654	unknown	unknown	0	0	0	0	0	0	0	0	0	0	0	0	0	0	0	0	0
Gamma_515	Bacteria	Proteobacteria	Gammaproteobacteria	UBA10353	LS-SOB	REDSEA-S09-B13	REDSEA-S09-B13sp002456995	0	0	0	0	0	0	0	0	0	0	0	0	0	0	0	0	0
Gamma_516	Bacteria	Proteobacteria	Gammaproteobacteria	Pseudomonadales	Pseudohongiellaceae	UBA9145	unknown	0	0	0	0	0	0	1	0	0	0	0	1	0	0	0	0	0
Gamma_517	Bacteria	Proteobacteria	Gammaproteobacteria	Pseudomonadales	Pseudohongiellaceae	UBA9145	unknown	0	0	0	0	0	0	1	0	0	0	0	1	0	0	0	0	0
Gamma_518	Bacteria	Proteobacteria	Gammaproteobacteria	UBA11654	UBA11654	unknown	unknown	0	0	0	0	0	0	0	0	0	0	0	0	0	0	0	0	0
Gamma_519	Bacteria	Proteobacteria	Gammaproteobacteria	Pseudomonadales	HTCC2089	UBA9659	unknown	0	0	0	0	1	0	1	0	0	0	1	0	0	0	0	0	1
Gamma_520	Bacteria	Proteobacteria	Gammaproteobacteria	UBA11654	UBA11654	unknown	unknown	0	0	0	0	0	0	0	0	0	0	0	0	0	0	0	0	0
Gamma_521	Bacteria	Proteobacteria	Gammaproteobacteria	UBA11654	UBA11654	unknown	unknown	0	0	0	0	0	0	0	0	0	0	0	1	0	0	0	0	0
Gamma_522	Bacteria	Proteobacteria	Gammaproteobacteria	UBA10353	LS-SOB	REDSEA-S09-B13	REDSEA-S09-B13sp002456995	0	0	0	0	0	0	0	0	0	0	0	0	0	0	0	0	0
Gamma_523	Bacteria	Proteobacteria	Gammaproteobacteria	UBA10353	LS-SOB	REDSEA-S09-B13	REDSEA-S09-B13sp002456995	0	0	0	0	0	0	0	0	0	0	0	0	0	0	0	0	0
Gamma_524	Bacteria	Proteobacteria	Gammaproteobacteria	UBA10353	LS-SOB	REDSEA-S09-B13	REDSEA-S09-B13sp002456995	0	0	0	0	0	0	0	0	0	0	0	0	0	0	0	0	0
Gamma_525	Bacteria	Proteobacteria	Gammaproteobacteria	SAR86	SAR86	AEGEAN-183	unknown	0	0	1	0	0	0	1	0	0	1	0	1	0	0	0	1	0
Gamma_526	Bacteria	Proteobacteria	Gammaproteobacteria	UBA11654	UBA11654	unknown	unknown	0	0	0	0	0	0	0	0	0	0	0	0	0	0	0	0	0
Gamma_527	Bacteria	Proteobacteria	Gammaproteobacteria	Pseudomonadales	Pseudohongiellaceae	UBA9145	UBA9145sp002694855	0	0	0	0	0	0	1	0	0	0	1	1	0	0	0	0	0
Gamma_528	Bacteria	Proteobacteria	Gammaproteobacteria	Pseudomonadales	HTCC2089	UBA11889	unknown	0	0	0	0	0	0	1	0	0	0	0	0	0	0	0	0	0
Gamma_529	Bacteria	Proteobacteria	Gammaproteobacteria	Pseudomonadales	Pseudohongiellaceae	UBA9145	UBA9145sp002694855	0	0	0	0	0	0	0	0	0	0	0	1	0	0	0	0	0
Gamma_530	Bacteria	Proteobacteria	Gammaproteobacteria	SAR86	SAR86	AEGEAN-183	unknown	0	0	1	0	0	0	1	0	0	1	0	1	0	0	0	1	0
Gamma_531	Bacteria	Proteobacteria	Gammaproteobacteria	UBA10353	LS-SOB	REDSEA-S09-B13	REDSEA-S09-B13sp002456995	0	0	0	0	0	0	0	0	0	0	0	0	0	0	0	0	0
Gamma_532	Bacteria	Proteobacteria	Gammaproteobacteria	UBA10353	LS-SOB	REDSEA-S09-B13	REDSEA-S09-B13sp002456995	0	0	0	0	0	0	0	0	0	0	0	0	0	0	0	0	0
Gamma_533	Bacteria	Proteobacteria	Gammaproteobacteria	UBA10353	LS-SOB	REDSEA-S09-B13	REDSEA-S09-B13sp002456995	0	0	0	0	0	0	0	0	0	0	0	0	0	0	0	0	0
Gamma_534	Bacteria	Proteobacteria	Gammaproteobacteria	SAR86	SAR86	AEGEAN-183	unknown	0	0	1	0	1	1	1	0	0	1	1	1	0	0	0	1	1
Gamma_535	Bacteria	Proteobacteria	Gammaproteobacteria	Pseudomonadales	HTCC2089	UBA11889	unknown	0	0	0	0	0	0	1	0	0	0	0	0	0	0	0	0	0
Gamma_536	Bacteria	Proteobacteria	Gammaproteobacteria	Pseudomonadales	HTCC2089	UBA9659	unknown	0	0	0	0	1	0	1	0	0	0	1	0	0	0	0	0	1
Gamma_537	Bacteria	Proteobacteria	Gammaproteobacteria	Pseudomonadales	Pseudohongiellaceae	UBA9145	unknown	0	0	0	0	0	0	1	0	0	0	0	1	0	0	0	0	0
Gamma_538	Bacteria	Proteobacteria	Gammaproteobacteria	UBA10353	LS-SOB	GCA-2726415	unknown	0	0	0	0	0	0	0	0	0	0	0	0	0	0	0	0	0
Gamma_539	Bacteria	Proteobacteria	Gammaproteobacteria	UBA11654	UBA11654	unknown	unknown	0	0	0	0	0	0	0	0	0	0	0	0	0	0	0	0	0
Gamma_540	Bacteria	Proteobacteria	Gammaproteobacteria	UBA11654	UBA11654	unknown	unknown	0	0	0	0	0	0	0	0	0	0	0	1	0	0	0	0	0
Gamma_541	Bacteria	Proteobacteria	Gammaproteobacteria	UBA10353	LS-SOB	REDSEA-S09-B13	REDSEA-S09-B13sp002456995	0	0	0	0	0	0	0	0	0	0	0	0	0	0	0	0	0
Gamma_542	Bacteria	Proteobacteria	Gammaproteobacteria	Woeseiales	Woeseiaceae	GCA-002728725	unknown	0	0	1	0	0	0	0	0	0	1	0	1	0	0	0	1	0
Gamma_543	Bacteria	Proteobacteria	Gammaproteobacteria	Pseudomonadales	HTCC2089	UBA9659	unknown	0	0	0	0	1	0	1	0	0	0	1	1	0	0	0	0	0
Gamma_544	Bacteria	Proteobacteria	Gammaproteobacteria	Pseudomonadales	Pseudohongiellaceae	UBA9145	unknown	0	0	0	0	0	0	1	0	0	0	0	1	0	0	0	0	0
Gamma_545	Bacteria	Proteobacteria	Gammaproteobacteria	UBA10353	LS-SOB	REDSEA-S09-B13	REDSEA-S09-B13sp002456995	0	0	0	0	0	0	0	0	0	0	0	0	0	0	0	0	0
Gamma_546	Bacteria	Proteobacteria	Gammaproteobacteria	UBA11654	UBA11654	unknown	unknown	0	0	0	0	0	0	0	0	0	0	0	0	0	0	0	0	0
Gamma_547	Bacteria	Proteobacteria	Gammaproteobacteria	UBA11654	UBA11654	unknown	unknown	0	0	0	0	0	0	0	0	0	0	0	1	0	0	0	0	0
Gamma_548	Bacteria	Proteobacteria	Gammaproteobacteria	Pseudomonadales	Pseudohongiellaceae	UBA9145	unknown	0	0	0	0	0	0	1	0	0	0	0	1	0	0	0	0	0
Gamma_549	Bacteria	Proteobacteria	Gammaproteobacteria	UBA11654	UBA11654	unknown	unknown	0	0	0	0	0	0	0	0	0	0	0	0	0	0	0	0	0
Gamma_550	Bacteria	Proteobacteria	Gammaproteobacteria	UBA10353	LS-SOB	REDSEA-S09-B13	unknown	0	0	0	0	0	0	0	0	0	0	0	0	0	0	0	0	0
Gamma_551	Bacteria	Proteobacteria	Gammaproteobacteria	Pseudomonadales	Pseudohongiellaceae	UBA9145	unknown	0	0	0	0	0	0	1	0	0	0	0	1	0	0	0	0	0
Gamma_552	Bacteria	Proteobacteria	Gammaproteobacteria	Pseudomonadales	HTCC2089	UBA9659	unknown	0	0	0	0	1	0	1	0	0	0	1	0	1	0	0	0	0
Gamma_553	Bacteria	Proteobacteria	Gammaproteobacteria	UBA11654	UBA11654	unknown	unknown	0	0	0	0	0	0	0	0	0	0	0	0	0	0	0	0	0
Gamma_554	Bacteria	Proteobacteria	Gammaproteobacteria	Thiomicrospirales	Thioglobaceae	Thioglobus	unknown	0	0	0	0	0	0	0	0	0	0	0	0	0	0	0	0	0
Gamma_556	Bacteria	Proteobacteria	Gammaproteobacteria	UBA10353	LS-SOB	GCA-2726415	unknown	0	0	0	0	0	0	0	0	0	0	0	0	0	0	0	0	0
Gamma_557	Bacteria	Proteobacteria	Gammaproteobacteria	SAR86	SAR86	AEGEAN-183	unknown	0	0	1	0	0	0	1	0	0	1	0	1	0	0	0	1	0
Gamma_558	Bacteria	Proteobacteria	Gammaproteobacteria	UBA10353	LS-SOB	REDSEA-S09-B13	REDSEA-S09-B13sp002456995	0	0	0	0	0	0	0	0	0	0	0	0	0	0	0	0	0
Gamma_559	Bacteria	Proteobacteria	Gammaproteobacteria	Pseudomonadales	Pseudohongiellaceae	UBA9145	UBA9145sp002694855	0	0	0	0	0	0	0	0	0	0	0	1	0	0	0	0	0
Gamma_560	Bacteria	Proteobacteria	Gammaproteobacteria	UBA10353	LS-SOB	UBA11791	unknown	0	0	0	0	0	0	1	0	0	0	0	0	0	0	0	0	0
Gamma_561	Bacteria	Proteobacteria	Gammaproteobacteria	UBA10353	LS-SOB	GCA-2726415	unknown	0	0	0	0	0	0	0	0	0	0	0	0	0	0	0	0	0
Gamma_562	Bacteria	Proteobacteria	Gammaproteobacteria	UBA11654	UBA11654	unknown	unknown	0	0	0	0	0	0	0	0	0	0	0	1	0	0	0	0	0
Gamma_d01	Bacteria	Proteobacteria	Gammaproteobacteria	UBA10353	LS-SOB	UBA11791	unknown	0	0	0	0	0	0	0	0	0	0	0	0	0	0	0	0	0
Gamma_d02	Bacteria	Proteobacteria	Gammaproteobacteria	Pseudomonadales	HTCC2089	UBA9659	unknown	0	0	0	0	1	0	1	0	0	0	1	0	0	0	0	0	0
Gamma_d03	Bacteria	Proteobacteria	Gammaproteobacteria	SAR86	SAR86	AEGEAN-183	unknown	0	0	1	0	0	0	1	0	0	1	0	1	0	0	0	1	0
Gamma_d04	Bacteria	Proteobacteria	Gammaproteobacteria	Pseudomonadales	Pseudohongiellaceae	UBA9145	unknown	0	0	0	0	0	0	0	0	0	0	0	0	0	0	0	0	0
Gamma_d05	Bacteria	Proteobacteria	Gammaproteobacteria	Thiomicrospirales	Thioglobaceae	Thioglobus	unknown	0	0	0	0	0	0	1	0	0	0	0	0	0	0	0	0	0
Gamma_d06	Bacteria	Proteobacteria	Gammaproteobacteria	Thiomicrospirales	Thioglobaceae	unknown	unknown	0	0	0	0	0	0	1	0	0	0	0	0	0	0	0	0	0
Gamma_d07	Bacteria	Proteobacteria	Gammaproteobacteria	UBA11654	UBA11654	unknown	unknown	0	0	0	0	0	0	0	0	0	0	0	1	0	0	0	0	0
Gamma_d08	Bacteria	Proteobacteria	Gammaproteobacteria	UBA11654	UBA11654	unknown	unknown	0	0	0	0	0	0	0	0	0	0	0	0	0	0	0	0	0
Gamma_d09	Bacteria	Proteobacteria	Gammaproteobacteria	Pseudomonadales	Moraxellaceae	Psychrobacter	Psychrobactersp002836505	0	0	0	0	0	0	1	0	0	0	0	1	0	0	0	0	0
Gamma_d10	Bacteria	Proteobacteria	Gammaproteobacteria	UBA10353	LS-SOB	UBA11791	unknown	0	0	0	0	0	0	0	0	0	0	0	0	0	0	0	0	0
Gamma_d11	Bacteria	Proteobacteria	Gammaproteobacteria	UBA11654	UBA11654	unknown	unknown	0	0	0	0	0	0	0	0	1	0	0	0	0	0	0	0	0
Gamma_d12	Bacteria	Proteobacteria	Gammaproteobacteria	UBA10353	LS-SOB	REDSEA-S09-B13	REDSEA-S09-B13sp003447825	0	0	0	0	0	0	0	0	0	0	0	1	0	0	0	0	0
Gamma_d13	Bacteria	Proteobacteria	Gammaproteobacteria	Pseudomonadales	Alcanivoracaceae	Alcanivorax	Alcanivoraxsp002726155	0	0	0	0	0	0	1	0	0	0	0	0	0	0	0	0	0
Gamma_d14	Bacteria	Proteobacteria	Gammaproteobacteria	Thiomicrospirales	Thioglobaceae	unknown	unknown	0	0	0	0	0	0	1	0	0	0	0	0	0	0	0	0	0
Gamma_d15	Bacteria	Proteobacteria	Gammaproteobacteria	UBA11654	UBA11654	unknown	unknown	0	0	0	0	0	0	0	0	0	0	0	0	0	0	0	0	0
Gamma_d16	Bacteria	Proteobacteria	Gammaproteobacteria	SAR86	SAR86	AEGEAN-183	unknown	0	0	1	0	0	0	1	0	0	1	0	1	0	0	0	1	0
Gamma_d17	Bacteria	Proteobacteria	Gammaproteobacteria	UBA10353	LS-SOB	REDSEA-S09-B13	REDSEA-S09-B13sp003447825	0	0	0	0	0	0	0	0	0	0	0	0	0	0	0	0	0
Gamma_d18	Bacteria	Proteobacteria	Gammaproteobacteria	UBA10353	LS-SOB	UBA11791	unknown	0	0	0	0	0	0	1	0	0	0	0	0	0	0	0	0	0
Gamma_d19	Bacteria	Proteobacteria	Gammaproteobacteria	Pseudomonadales	Oleiphilaceae	Marinobacter	Marinobactersalarius	0	0	0	0	0	0	1	0	0	0	0	1	0	0	0	0	0
Gamma_d20	Bacteria	Proteobacteria	Gammaproteobacteria	Thiomicrospirales	Thioglobaceae	Thioglobus	unknown	0	0	0	0	0	0	1	0	0	0	0	0	0	0	0	0	0
Gamma_d21	Bacteria	Proteobacteria	Gammaproteobacteria	Thiomicrospirales	Thioglobaceae	unknown	unknown	0	0	0	0	0	0	1	0	0	0	0	0	0	0	0	0	0
Gamma_d22	Bacteria	Proteobacteria	Gammaproteobacteria	UBA11654	UBA11654	unknown	unknown	0	0	0	0	0	0	0	0	0	0	0	0	0	0	0	0	0
Gamma_d23	Bacteria	Proteobacteria	Gammaproteobacteria	UBA10353	LS-SOB	REDSEA-S09-B13	REDSEA-S09-B13sp003447825	0	0	0	0	0	0	0	0	0	0	0	0	0	0	1	0	0
Gamma_d24	Bacteria	Proteobacteria	Gammaproteobacteria	UBA10353	LS-SOB	UBA11791	UBA11791sp002714255	0	0	0	0	0	0	0	0	0	0	0	0	1	0	0	0	0
Gamma_d25	Bacteria	Proteobacteria	Gammaproteobacteria	Pseudomonadales	Pseudohongiellaceae	UBA9145	UBA9145sp002731775	0	1	0	0	0	0	1	0	0	0	0	1	0	0	0	0	0
Gamma_d26	Bacteria	Proteobacteria	Gammaproteobacteria	Pseudomonadales	Oleiphilaceae	Marinobacter	Marinobactersalarius	0	0	0	0	0	0	1	0	0	0	0	1	0	0	0	0	0
Gamma_d27	Bacteria	Proteobacteria	Gammaproteobacteria	SAR86	SAR86	AEGEAN-183	unknown	0	0	1	0	0	0	1	0	0	1	0	1	0	0	0	1	0
Gamma_d28	Bacteria	Proteobacteria	Gammaproteobacteria	UBA11654	UBA11654	unknown	unknown	0	0	0	0	0	0	0	0	0	0	0	0	0	0	0	0	0
Gamma_d29	Bacteria	Proteobacteria	Gammaproteobacteria	Thiomicrospirales	Thioglobaceae	Thioglobus	unknown	0	0	0	0	0	0	1	0	0	0	0	0	0	0	0	0	0
Gamma_d30	Bacteria	Proteobacteria	Gammaproteobacteria	Thiomicrospirales	Thioglobaceae	unknown	unknown	0	0	0	0	0	0	1	0	0	0	0	0	0	0	0	0	0
Gemma_1501	Bacteria	Gemmatimonadota	Gemmatimonadetes	SG8-23	UBA6960	UBA887	UBA887sp002313925	0	0	0	0	0	0	0	0	0	0	0	0	0	0	0	0	0
Gemma_1502	Bacteria	Gemmatimonadota	Gemmatimonadetes	SG8-23	UBA6960	UBA887	UBA887 sp002313925	0	0	0	0	0	0	1	0	0	0	0	1	0	0	0	0	0
Gemma_1504	Bacteria	Gemmatimonadota	Gemmatimonadetes	SG8-23	UBA6960	UBA887	UBA887sp002313925	0	0	0	0	0	0	1	0	0	0	0	1	0	0	0	0	0
Gemma_1505	Bacteria	Gemmatimonadota	Gemmatimonadetes	SG8-23	UBA6960	UBA1138	UBA1138sp003447875	0	0	0	0	0	0	1	0	0	1	0	1	0	0	0	0	0
Gemma_1506	Bacteria	Gemmatimonadota	Gemmatimonadetes	SG8-23	UBA6960	UBA887	UBA887sp002313925	0	0	0	0	0	0	1	0	0	0	0	1	0	0	0	0	0
Gemma_1507	Bacteria	Gemmatimonadota	Gemmatimonadetes	SG8-23	UBA6960	UBA1138	UBA1138sp003447875	0	0	0	0	0	0	1	0	0	0	0	1	0	0	0	0	0
Gemma_1508	Bacteria	Gemmatimonadota	Gemmatimonadetes	SG8-23	UBA6960	UBA1138	UBA1138sp003447875	0	0	0	0	0	0	1	0	0	0	0	1	0	0	0	0	0
Gemma_1509	Bacteria	Gemmatimonadota	Gemmatimonadetes	SG8-23	UBA6960	UBA887	UBA887sp002313925	0	0	0	0	0	0	1	0	0	0	0	1	0	0	0	0	0
Gemma_1510	Bacteria	Gemmatimonadota	Gemmatimonadetes	SG8-23	UBA6960	UBA822	unknown	0	0	0	0	0	0	1	0	0	0	1	1	1	0	0	0	0
Gemma_1511	Bacteria	Gemmatimonadota	Gemmatimonadetes	SG8-23	UBA6960	UBA887	UBA887sp002313925	0	0	0	0	0	0	0	0	0	0	0	1	0	0	0	0	0
Gemma_1512	Bacteria	Gemmatimonadota	Gemmatimonadetes	SG8-23	UBA6960	UBA1138	unknown	0	0	0	0	0	0	1	0	0	0	1	0	1	0	0	0	0
Gemma_202	Bacteria	Gemmatimonadota	Gemmatimonadetes	SG8-23	UBA6960	UBA887	UBA887sp002313925	0	0	0	0	0	0	1	0	0	0	0	1	0	0	0	0	0
Gemma_203	Bacteria	Gemmatimonadota	Gemmatimonadetes	SG8-23	UBA6960	UBA887	UBA887sp002313925	0	0	0	0	0	0	1	0	0	0	0	1	0	0	0	0	0
Gemma_204	Bacteria	Gemmatimonadota	Gemmatimonadetes	SG8-23	UBA6960	UBA887	unknown	0	0	0	0	0	0	1	0	0	0	0	1	0	0	0	0	0
Gemma_205	Bacteria	Gemmatimonadota	Gemmatimonadetes	SG8-23	UBA6960	UBA887	UBA887sp002313925	0	0	0	0	0	0	1	0	0	0	0	1	0	0	0	0	0
Gemma_501	Bacteria	Gemmatimonadota	Gemmatimonadetes	SG8-23	UBA6960	UBA887	UBA887sp002313925	0	0	0	0	0	0	0	0	0	0	0	0	0	0	0	0	0
Gemma_502	Bacteria	Gemmatimonadota	Gemmatimonadetes	SG8-23	UBA6960	UBA887	UBA887sp002313925	0	0	0	0	0	0	1	0	0	0	0	1	0	0	0	0	0
Gemma_503	Bacteria	Gemmatimonadota	Gemmatimonadetes	SG8-23	UBA6960	UBA887	UBA887sp002313925	0	0	0	0	0	0	1	0	0	0	0	1	0	0	0	0	0
Gemma_504	Bacteria	Gemmatimonadota	Gemmatimonadetes	SG8-23	UBA6960	UBA887	UBA887sp002313925	0	0	0	0	0	0	1	0	0	0	0	1	0	0	0	0	0
Gemma_505	Bacteria	Gemmatimonadota	Gemmatimonadetes	SG8-23	UBA6960	GCA-2718595	unknown	0	0	0	0	0	0	1	0	0	0	0	1	0	0	0	0	0
Gemma_506	Bacteria	Gemmatimonadota	Gemmatimonadetes	SG8-23	UBA6960	UBA887	UBA887sp002313925	0	0	0	0	0	0	1	0	0	0	0	1	0	0	0	0	0
Gemma_d01	Bacteria	Gemmatimonadota	Gemmatimonadetes	SG8-23	UBA6960	UBA1138	UBA1138sp003447875	0	0	0	0	0	0	1	0	0	0	1	1	1	0	1	0	1
Gemma_d02	Bacteria	Gemmatimonadota	Gemmatimonadetes	SG8-23	UBA6960	UBA1138	UBA1138 sp003447875	0	0	0	0	0	0	1	0	0	0	1	1	1	0	0	0	0
Gemma_d03	Bacteria	Gemmatimonadota	Gemmatimonadetes	SG8-23	UBA6960	unknown	unknown	0	0	0	0	0	0	1	0	0	0	0	1	0	0	0	0	0
Gemma_d04	Bacteria	Gemmatimonadota	Gemmatimonadetes	SG8-23	UBA6960	UBA1138	UBA1138sp003447875	0	0	0	0	0	0	1	0	0	0	1	1	1	0	0	0	0
Gemma_d05	Bacteria	Gemmatimonadota	Gemmatimonadetes	SG8-23	UBA6960	UBA1138	UBA1138sp003447875	0	0	0	0	0	0	1	0	0	0	1	1	1	0	0	0	0
Gemma_d06	Bacteria	Gemmatimonadota	Gemmatimonadetes	SG8-23	UBA6960	UBA1138	UBA1138sp003447875	0	0	0	0	0	0	1	0	0	0	1	1	1	0	0	0	0
Lates_d01	Bacteria	Latescibacterota	p_Latescibacterota	p_Latescibacterota	unknown	unknown	unknown	0	0	1	0	1	1	1	0	1	0	1	1	1	0	1	0	0
Lenti_201	Bacteria	Verrucomicrobiota	Lentisphaeria	c_Lentisphaeria	unknown	unknown	unknown	0	0	1	1	1	1	1	0	1	1	1	1	1	0	0	1	1
Marin_1501	Bacteria	Marinisomatota	Marinisomatia	SCGC-AAA003-L08	unknown	unknown	unknown	0	0	0	0	1	0	0	0	0	0	0	0	0	0	0	0	1
Marin_1502	Bacteria	Marinisomatota	Marinisomatia	Marinisomatales	TCS55	TCS55	TCS55sp002715035	0	0	0	0	1	0	1	0	1	0	1	0	0	0	0	0	1
Marin_1503	Bacteria	Marinisomatota	Marinisomatia	SCGC-AAA003-L08	unknown	unknown	unknown	0	0	1	0	1	1	0	0	0	0	0	0	0	0	0	0	1
Marin_1504	Bacteria	Marinisomatota	Marinisomatia	Marinisomatales	UBA1611	GCA-2722105	unknown	0	0	0	0	1	0	1	0	1	1	1	0	1	0	0	0	1
Marin_1505	Bacteria	Marinisomatota	Marinisomatia	Marinisomatales	TCS55	TCS55	TCS55sp002715035	0	0	0	0	1	0	0	0	1	0	1	0	0	0	0	0	1
Marin_1506	Bacteria	Marinisomatota	Marinisomatia	Marinisomatales	TCS55	TCS55	TCS55sp002715035	0	0	0	0	1	0	1	0	1	0	1	0	0	0	0	0	1
Marin_1507	Bacteria	Marinisomatota	Marinisomatia	SCGC-AAA003-L08	unknown	unknown	unknown	0	0	0	0	0	0	0	0	0	0	0	0	0	0	0	0	0
Marin_1508	Bacteria	Marinisomatota	Marinisomatia	Marinisomatales	TCS55	TCS55	TCS55sp002715035	0	0	0	0	1	0	0	0	1	0	1	0	0	0	0	0	1
Marin_1509	Bacteria	Marinisomatota	Marinisomatia	Marinisomatales	TCS55	TCS55	unknown	0	0	0	0	1	0	1	0	1	0	1	0	1	0	0	1	1
Marin_1510	Bacteria	Marinisomatota	Marinisomatia	SCGC-AAA003-L08	unknown	unknown	unknown	0	0	0	0	1	0	0	0	0	0	0	0	0	0	0	0	1
Marin_1511	Bacteria	Marinisomatota	Marinisomatia	Marinisomatales	TCS55	TCS55	TCS55sp002715035	0	0	0	0	1	0	1	0	0	0	1	0	0	0	0	0	1
Marin_201	Bacteria	Marinisomatota	Marinisomatia	Marinisomatales	TCS55	TCS55	TCS55sp002715035	0	0	0	0	1	0	1	0	1	0	1	0	0	0	0	0	1
Marin_202	Bacteria	Marinisomatota	Marinisomatia	Marinisomatales	UBA1611	GCA-2722105	unknown	0	0	1	0	1	1	0	0	0	1	0	0	1	0	0	1	1
Marin_203	Bacteria	Marinisomatota	Marinisomatia	Marinisomatales	TCS55	TCS55	TCS55sp002715035	0	0	0	0	1	0	1	0	1	0	1	0	0	0	0	0	1
Marin_205	Bacteria	Marinisomatota	Marinisomatia	Marinisomatales	UBA1611	GCA-2722105	unknown	0	0	0	1	1	0	0	0	0	1	1	0	0	0	0	1	1
Marin_206	Bacteria	Marinisomatota	Marinisomatia	Marinisomatales	TCS55	TCS55	TCS55sp002715035	0	0	0	0	1	0	1	0	0	0	1	0	0	0	0	0	1
Marin_207	Bacteria	Marinisomatota	Marinisomatia	Marinisomatales	TCS55	TCS55	TCS55sp002715035	0	0	0	0	1	0	1	0	1	0	1	0	0	0	0	0	1
Marin_208	Bacteria	Marinisomatota	Marinisomatia	Marinisomatales	TCS55	TCS55	TCS55sp002715035	0	0	0	0	1	0	1	0	1	0	1	0	0	0	0	0	1
Marin_501	Bacteria	Marinisomatota	Marinisomatia	Marinisomatales	TCS55	TCS55	TCS55sp002715035	0	0	0	0	1	0	1	0	0	0	1	0	0	0	0	0	1
Marin_502	Bacteria	Marinisomatota	Marinisomatia	Marinisomatales	TCS55	TCS55	TCS55 sp002715035	0	0	0	0	1	0	1	0	0	0	1	1	0	0	0	0	1
Marin_503	Bacteria	Marinisomatota	Marinisomatia	Marinisomatales	UBA1611	GCA-2722105	unknown	0	0	0	0	1	0	0	0	1	1	1	0	0	0	0	1	1
Marin_504	Bacteria	Marinisomatota	Marinisomatia	Marinisomatales	TCS55	TCS55	TCS55sp002715035	0	0	0	0	1	0	1	0	0	0	1	0	0	0	0	0	1
Marin_505	Bacteria	Marinisomatota	Marinisomatia	Marinisomatales	TCS55	TCS55	TCS55sp002715035	0	0	0	0	1	0	1	0	1	0	1	0	0	0	0	0	1
Marin_506	Bacteria	Marinisomatota	Marinisomatia	Marinisomatales	TCS55	TCS55	TCS55sp002715035	0	0	0	0	1	0	1	0	1	0	1	0	0	0	0	0	1
Marin_507	Bacteria	Marinisomatota	Marinisomatia	Marinisomatales	TCS55	TCS55	TCS55sp002715035	0	0	0	0	1	0	1	0	1	0	1	0	1	0	0	0	1
Marin_508	Bacteria	Marinisomatota	Marinisomatia	Marinisomatales	TCS55	TCS55	TCS55sp002715035	0	0	0	0	1	0	1	0	1	0	1	0	0	0	0	0	1
Marin_509	Bacteria	Marinisomatota	Marinisomatia	Marinisomatales	TCS55	TCS55	TCS55sp002715035	0	0	0	0	1	0	1	0	1	0	1	0	0	0	0	0	1
Marin_510	Bacteria	Marinisomatota	Marinisomatia	Marinisomatales	TCS55	TCS55	TCS55sp002716525	0	0	0	0	1	0	0	0	1	0	0	0	1	0	0	0	1
Marin_511	Bacteria	Marinisomatota	Marinisomatia	Marinisomatales	TCS55	TCS55	TCS55sp002715035	0	0	0	0	1	0	1	0	0	0	1	0	0	0	0	0	1
Marin_512	Bacteria	Marinisomatota	Marinisomatia	Marinisomatales	TCS55	TCS55	TCS55sp002715035	0	0	0	0	1	0	1	0	0	0	1	0	0	0	0	0	1
Marin_513	Bacteria	Marinisomatota	Marinisomatia	Marinisomatales	TCS55	TCS55	TCS55sp002715035	0	0	0	0	1	0	1	0	0	0	1	1	0	0	0	0	1
Marin_514	Bacteria	Marinisomatota	Marinisomatia	Marinisomatales	TCS55	TCS55	TCS55sp002715035	0	0	0	0	1	0	1	0	1	0	1	0	0	0	0	0	1
Marin_d01	Bacteria	Marinisomatota	Marinisomatia	Marinisomatales	TCS55	TCS55	TCS55sp002715035	0	0	0	0	1	0	1	0	0	0	1	1	0	0	0	0	1
Marin_d02	Bacteria	Marinisomatota	Marinisomatia	Marinisomatales	UBA8229	UBA8229	UBA8229sp003535775	0	0	0	1	0	0	0	0	0	1	0	0	0	0	0	1	1
Alpha_d01	Bacteria	Proteobacteria	Alphaproteobacteria	Pelagibacterales	Pelagibacteraceae	AG-414-E02	unknown	0	0	0	0	0	0	0	0	0	0	0	0	0	0	0	0	0
Marin_d04	Bacteria	Marinisomatota	Marinisomatia	Marinisomatales	TCS55	unknown	unknown	0	0	0	0	1	0	1	0	1	0	1	0	1	0	0	0	0
Marin_d05	Bacteria	Marinisomatota	Marinisomatia	Marinisomatales	TCS55	TCS55	TCS55sp002715035	0	0	0	0	1	0	1	0	0	0	1	1	0	0	0	0	1
Marin_d06	Bacteria	Marinisomatota	Marinisomatia	Marinisomatales	TCS55	TCS55	TCS55sp002715035	0	0	0	0	1	0	1	0	0	0	1	1	0	0	0	0	1
Marin_d07	Bacteria	Marinisomatota	Marinisomatia	Marinisomatales	TCS55	UBA2126	unknown	0	0	0	0	1	0	1	0	0	0	0	0	1	0	0	0	0
Marin_d08	Bacteria	Marinisomatota	Marinisomatia	SCGC-AAA003-L08	unknown	unknown	unknown	0	0	0	0	1	0	0	0	0	1	0	0	1	0	0	1	1
Marin_d09	Bacteria	Marinisomatota	Marinisomatia	Marinisomatales	TCS55	TCS55	TCS55sp002715035	0	0	0	0	1	0	1	0	0	0	1	1	0	0	0	0	1
Marin_d10	Bacteria	Marinisomatota	Marinisomatia	Marinisomatales	TCS55	unknown	unknown	0	0	0	0	1	0	1	0	0	1	0	0	1	0	0	0	1
Myxoc_201	Bacteria	Myxococcota	UBA9160	UBA9160	unknown	unknown	unknown	0	0	1	0	0	0	1	0	0	1	0	1	0	0	0	1	0
Nitros_201	Bacteria	Nitrospinota	Nitrospinia	Nitrospinales	Nitrospinaceae	UBA8687	unknown	0	0	0	0	0	0	1	0	0	0	0	0	0	0	0	0	0
Nitros_202	Bacteria	Nitrospinota	Nitrospinia	Nitrospinales	Nitrospinaceae	UBA8687	UBA8687sp002697825	0	0	0	0	0	0	0	0	0	0	0	0	0	0	0	0	0
Nitros_203	Bacteria	Nitrospinota	Nitrospinia	Nitrospinales	Nitrospinaceae	UBA8687	unknown	0	0	0	0	0	0	1	0	0	0	0	0	0	0	0	0	0
Nitros_204	Bacteria	Nitrospinota	Nitrospinia	Nitrospinales	Nitrospinaceae	SCGCAAA288-L16	unknown	0	0	0	0	0	0	0	0	0	0	0	0	0	0	0	0	0
Nitros_205	Bacteria	Nitrospinota	Nitrospinia	Nitrospinales	Nitrospinaceae	LS-NOB	LS-NOBsp003545625	0	0	0	0	0	0	1	0	0	0	0	0	0	0	0	0	0
Nitros_501	Bacteria	Nitrospinota	Nitrospinia	Nitrospinales	Nitrospinaceae	LS-NOB	LS-NOBsp003545625	0	0	0	0	0	0	1	0	0	0	0	1	0	0	0	0	0
Nitros_502	Bacteria	Nitrospinota	Nitrospinia	Nitrospinales	Nitrospinaceae	LS-NOB	LS-NOBsp003545625	0	0	0	0	0	0	1	0	0	0	0	1	0	0	0	0	0
Nitros_503	Bacteria	Nitrospinota	Nitrospinia	Nitrospinales	Nitrospinaceae	LS-NOB	LS-NOBsp003545625	0	0	0	0	0	0	1	0	0	0	0	0	0	0	0	0	0
Nitros_504	Bacteria	Nitrospinota	Nitrospinia	Nitrospinales	Nitrospinaceae	LS-NOB	LS-NOBsp003545625	0	0	0	0	0	0	1	0	0	0	0	0	0	0	0	0	0
Nitros_507	Bacteria	Nitrospinota	Nitrospinia	Nitrospinales	Nitrospinaceae	LS-NOB	LS-NOBsp003545625	0	0	0	0	0	0	0	0	0	0	0	1	0	0	0	0	0
Nitros_508	Bacteria	Nitrospinota	Nitrospinia	Nitrospinales	Nitrospinaceae	LS-NOB	LS-NOBsp003545625	0	0	0	0	0	0	1	0	0	0	0	1	0	0	0	0	0
Nitros_509	Bacteria	Nitrospinota	Nitrospinia	Nitrospinales	Nitrospinaceae	LS-NOB	LS-NOBsp003545625	0	0	0	0	0	0	0	0	0	0	0	0	0	0	0	0	0
Nitros_510	Bacteria	Nitrospinota	Nitrospinia	Nitrospinales	Nitrospinaceae	LS-NOB	LS-NOBsp003545625	0	0	0	0	0	0	0	0	0	0	0	0	0	0	0	0	0
Phyci_d01	Bacteria	Planctomycetota	Phycisphaerae	Phycisphaerales	SM1A02	GCA-002718515	unknown	0	0	0	0	0	0	0	0	1	0	0	0	0	0	0	0	0
Planc_201	Bacteria	Planctomycetota	Planctomycetes	Pirellulales	Pirellulaceae	Rubripirellula	Rubripirellulasp002862205	0	0	1	1	1	1	0	0	1	1	1	0	1	0	1	1	1
Planc_202	Bacteria	Planctomycetota	Planctomycetes	Pirellulales	UBA7805	UBA7805	UBA7805sp002168195	0	0	0	1	1	0	0	0	0	0	1	0	0	0	0	0	0
Planc_203	Bacteria	Planctomycetota	Planctomycetes	Pirellulales	Pirellulaceae	unknown	unknown	0	0	0	0	0	0	0	0	0	0	0	0	0	0	0	0	0
Planc_501	Bacteria	Planctomycetota	Planctomycetes	Pirellulales	Pirellulaceae	unknown	unknown	0	0	0	0	0	0	0	0	0	0	0	0	0	0	0	0	0
Planc_502	Bacteria	Planctomycetota	Planctomycetes	Pirellulales	UBA1268	UBA1268	unknown	0	0	1	1	1	0	0	0	1	1	0	1	0	0	0	1	1
Planc_503	Bacteria	Planctomycetota	Planctomycetes	Pirellulales	Pirellulaceae	Mariniblastus	unknown	0	0	1	0	0	0	0	1	1	1	0	1	0	0	0	0	1
Planc_d01	Bacteria	Planctomycetota	Planctomycetes	Pirellulales	Pirellulaceae	unknown	unknown	0	0	0	0	0	0	0	0	1	1	0	0	0	0	0	0	0
Planc_d02	Bacteria	Planctomycetota	Planctomycetes	Pirellulales	Pirellulaceae	unknown	unknown	0	0	0	0	0	0	0	0	1	1	1	0	0	0	1	0	0
Posei_1501	Archaea	Thermoplasmatota	Poseidoniia	Poseidoniales	Thalassoarchaeaceae	MGIIb-O1	MGIIb-O1sp002498525	0	0	0	0	0	0	0	0	0	0	0	1	0	0	0	0	0
Posei_1502	Archaea	Thermoplasmatota	Poseidoniia	Poseidoniales	Thalassoarchaeaceae	Thalassarchaeum	Thalassarchaeumsp002495735	0	0	0	0	0	0	0	0	0	0	0	0	0	0	0	0	0
Posei_1504	Archaea	Thermoplasmatota	Poseidoniia	Poseidoniales	Thalassoarchaeaceae	MGIIb-O1	MGIIb-O1sp002498525	0	0	0	0	0	0	0	0	0	0	0	1	0	0	0	0	0
Posei_1505	Archaea	Thermoplasmatota	Poseidoniia	Poseidoniales	Thalassoarchaeaceae	Thalassarchaeum	Thalassarchaeumsp002495735	0	0	0	0	0	0	0	0	0	0	0	0	0	0	0	0	0
Posei_1506	Archaea	Thermoplasmatota	Poseidoniia	MGIII	CG-Epi1	CG-Epi1	unknown	0	0	0	0	0	0	0	0	0	0	0	0	0	0	0	0	0
Posei_1507	Archaea	Thermoplasmatota	Poseidoniia	Poseidoniales	Thalassoarchaeaceae	MGIIb-O1	MGIIb-O1sp002498525	0	0	0	0	0	0	0	0	0	0	0	1	0	0	0	0	0
Posei_1508	Archaea	Thermoplasmatota	Poseidoniia	MGIII	CG-Epi1	UBA8886	UBA8886 sp002731655	0	0	0	0	0	0	0	0	0	0	0	0	0	0	0	0	0
Posei_1509	Archaea	Thermoplasmatota	Poseidoniia	Poseidoniales	Thalassoarchaeaceae	Thalassarchaeum	Thalassarchaeumsp002507125	0	0	0	0	0	0	0	0	0	0	0	0	0	0	0	0	0
Posei_1510	Archaea	Thermoplasmatota	Poseidoniia	Poseidoniales	Thalassoarchaeaceae	Thalassarchaeum	Thalassarchaeumsp002495735	0	0	0	0	0	0	0	0	0	0	0	0	0	0	0	0	0
Posei_1511	Archaea	Thermoplasmatota	Poseidoniia	Poseidoniales	Thalassoarchaeaceae	MGIIb-O1	MGIIb-O1sp002498525	0	0	0	0	0	0	0	0	0	0	0	1	0	0	0	0	0
Posei_1512	Archaea	Thermoplasmatota	Poseidoniia	Poseidoniales	Thalassoarchaeaceae	Thalassarchaeum	Thalassarchaeumsp002507125	0	0	0	0	0	0	0	0	0	0	0	0	0	0	0	0	0
Posei_1513	Archaea	Thermoplasmatota	Poseidoniia	MGIII	CG-Epi1	UBA8886	UBA8886sp002731655	0	0	0	0	0	0	0	0	0	0	0	0	0	0	0	0	0
Posei_1514	Archaea	Thermoplasmatota	Poseidoniia	MGIII	CG-Epi1	CG-Epi1	CG-Epi1sp002506485	0	0	0	0	0	0	0	0	0	0	0	0	0	0	0	0	0
Posei_1515	Archaea	Thermoplasmatota	Poseidoniia	MGIII	CG-Epi1	CG-Epi1	unknown	0	0	0	0	1	0	0	0	0	0	0	0	0	0	0	0	0
Posei_1516	Archaea	Thermoplasmatota	Poseidoniia	MGIII	CG-Epi1	UBA8886	UBA8886sp002731655	0	0	0	0	0	0	0	0	0	0	0	0	0	0	0	0	0
Posei_1517	Archaea	Thermoplasmatota	Poseidoniia	Poseidoniales	Thalassoarchaeaceae	MGIIb-O1	MGIIb-O1sp002498525	0	0	0	0	0	0	0	0	0	0	0	1	0	0	0	0	0
Posei_1518	Archaea	Thermoplasmatota	Poseidoniia	Poseidoniales	Thalassoarchaeaceae	Thalassarchaeum	Thalassarchaeumsp002507125	0	0	0	0	0	0	0	0	0	0	0	0	0	0	0	0	0
Posei_1519	Archaea	Thermoplasmatota	Poseidoniia	Poseidoniales	Thalassoarchaeaceae	Thalassarchaeum	Thalassarchaeumsp002495735	0	0	0	0	0	0	0	0	0	0	0	0	0	0	0	0	0
Posei_1521	Archaea	Thermoplasmatota	Poseidoniia	MGIII	CG-Epi1	CG-Epi1	CG-Epi1sp002506485	0	0	0	0	0	0	0	0	0	0	0	0	0	0	0	0	0
Posei_1522	Archaea	Thermoplasmatota	Poseidoniia	Poseidoniales	Thalassoarchaeaceae	Thalassarchaeum	Thalassarchaeumsp002495735	0	0	0	0	0	0	0	0	0	0	0	0	0	0	0	0	0
Posei_1523	Archaea	Thermoplasmatota	Poseidoniia	Poseidoniales	Thalassoarchaeaceae	MGIIb-O1	MGIIb-O1sp002498525	0	0	0	0	0	0	0	0	0	0	0	0	0	0	0	0	0
Posei_1524	Archaea	Thermoplasmatota	Poseidoniia	Poseidoniales	Thalassoarchaeaceae	Thalassarchaeum	Thalassarchaeumsp002495735	0	0	0	0	0	0	0	0	0	0	0	0	0	0	0	0	0
Posei_201	Archaea	Thermoplasmatota	Poseidoniia	Poseidoniales	Thalassoarchaeaceae	Thalassarchaeum	Thalassarchaeumsp002495735	0	0	0	0	0	0	0	0	0	0	0	0	0	0	0	0	0
Posei_202	Archaea	Thermoplasmatota	Poseidoniia	Poseidoniales	Thalassoarchaeaceae	Thalassarchaeum	Thalassarchaeumsp002495735	0	0	0	0	0	0	0	0	0	0	0	0	0	0	0	0	0
Posei_203	Archaea	Thermoplasmatota	Poseidoniia	Poseidoniales	Thalassoarchaeaceae	Thalassarchaeum	Thalassarchaeumsp002495735	0	0	0	0	0	0	0	0	0	0	0	0	0	0	0	0	0
Posei_204	Archaea	Thermoplasmatota	Poseidoniia	Poseidoniales	Thalassoarchaeaceae	MGIIb-O2	unknown	0	0	0	0	0	0	0	0	0	0	0	0	0	0	0	0	0
Posei_205	Archaea	Thermoplasmatota	Poseidoniia	Poseidoniales	Thalassoarchaeaceae	Thalassarchaeum	Thalassarchaeumsp002495735	0	0	0	0	0	0	0	0	0	0	0	0	0	0	0	0	0
Posei_206	Archaea	Thermoplasmatota	Poseidoniia	Poseidoniales	Thalassoarchaeaceae	MGIIb-O1	MGIIb-O1sp8684u	0	0	0	0	0	0	0	0	0	0	0	0	0	0	0	0	0
Posei_207	Archaea	Thermoplasmatota	Poseidoniia	Poseidoniales	Thalassoarchaeaceae	Thalassarchaeum	unknown	0	0	0	0	0	0	0	0	0	0	0	0	0	0	0	0	0
Posei_208	Archaea	Thermoplasmatota	Poseidoniia	Poseidoniales	Thalassoarchaeaceae	MGIIb-O1	MGIIb-O1sp8684u	0	0	0	0	0	0	0	0	0	0	0	0	0	0	0	0	0
Posei_209	Archaea	Thermoplasmatota	Poseidoniia	Poseidoniales	Thalassoarchaeaceae	Thalassarchaeum	Thalassarchaeumsp002457605	0	0	0	0	0	0	0	0	0	0	0	0	0	0	0	0	0
Posei_210	Archaea	Thermoplasmatota	Poseidoniia	Poseidoniales	Thalassoarchaeaceae	Thalassarchaeum	unknown	0	0	0	0	0	0	0	0	0	0	0	0	0	0	0	0	0
Posei_211	Archaea	Thermoplasmatota	Poseidoniia	Poseidoniales	Thalassoarchaeaceae	MGIIb-O1	MGIIb-O1sp8684u	0	0	0	0	0	0	0	0	0	0	0	0	0	0	0	0	0
Posei_212	Archaea	Thermoplasmatota	Poseidoniia	Poseidoniales	Thalassoarchaeaceae	MGIIb-O1	MGIIb-O1sp8684u	0	0	0	0	0	0	0	0	0	0	0	0	0	0	0	0	0
Posei_213	Archaea	Thermoplasmatota	Poseidoniia	Poseidoniales	Thalassoarchaeaceae	MGIIb-O2	unknown	0	0	0	0	0	0	0	0	0	0	0	0	0	0	0	0	0
Posei_214	Archaea	Thermoplasmatota	Poseidoniia	Poseidoniales	Thalassoarchaeaceae	Thalassarchaeum	Thalassarchaeumsp002698225	0	0	0	0	0	0	0	0	0	0	0	0	0	0	0	0	0
Posei_215	Archaea	Thermoplasmatota	Poseidoniia	Poseidoniales	Thalassoarchaeaceae	Thalassarchaeum	Thalassarchaeumsp002457605	0	0	0	0	0	0	0	0	0	0	0	0	0	0	0	0	0
Posei_216	Archaea	Thermoplasmatota	Poseidoniia	Poseidoniales	Thalassoarchaeaceae	Thalassarchaeum	unknown	0	0	0	0	0	0	0	0	0	0	0	0	0	0	0	0	0
Posei_217	Archaea	Thermoplasmatota	Poseidoniia	Poseidoniales	Thalassoarchaeaceae	Thalassarchaeum	Thalassarchaeumsp002495735	0	0	0	0	0	0	0	0	0	0	0	0	0	0	0	0	0
Posei_218	Archaea	Thermoplasmatota	Poseidoniia	Poseidoniales	Thalassoarchaeaceae	MGIIb-O2	unknown	0	0	0	0	0	0	0	0	0	0	0	1	0	0	0	0	0
Posei_219	Archaea	Thermoplasmatota	Poseidoniia	Poseidoniales	Thalassoarchaeaceae	Thalassarchaeum	Thalassarchaeumsp002495735	0	0	0	0	0	0	0	0	0	0	0	0	0	0	0	0	0
Posei_220	Archaea	Thermoplasmatota	Poseidoniia	Poseidoniales	Thalassoarchaeaceae	MGIIb-O2	unknown	0	0	0	0	0	0	0	0	0	0	0	0	0	0	0	0	0
Posei_221	Archaea	Thermoplasmatota	Poseidoniia	Poseidoniales	Thalassoarchaeaceae	MGIIb-O1	MGIIb-O1sp002498525	0	0	0	0	0	0	0	0	0	0	0	1	0	0	0	0	0
Posei_222	Archaea	Thermoplasmatota	Poseidoniia	Poseidoniales	Thalassoarchaeaceae	Thalassarchaeum	Thalassarchaeumsp002495735	0	0	0	0	0	0	0	0	0	0	0	0	0	0	0	0	0
Posei_224	Archaea	Thermoplasmatota	Poseidoniia	Poseidoniales	Thalassoarchaeaceae	MGIIb-O2	unknown	0	0	0	0	0	0	0	0	0	0	0	0	0	0	0	0	0
Posei_225	Archaea	Thermoplasmatota	Poseidoniia	Poseidoniales	Thalassoarchaeaceae	MGIIb-O1	MGIIb-O1sp002498525	0	0	0	0	0	0	0	0	0	0	0	1	0	0	0	0	0
Posei_226	Archaea	Thermoplasmatota	Poseidoniia	Poseidoniales	Thalassoarchaeaceae	Thalassarchaeum	unknown	0	0	0	0	0	0	0	0	0	0	0	0	0	0	0	0	0
Posei_227	Archaea	Thermoplasmatota	Poseidoniia	MGIII	CG-Epi1	CG-Epi1	unknown	0	0	0	0	0	0	0	0	0	0	0	0	0	0	0	0	0
Posei_228	Archaea	Thermoplasmatota	Poseidoniia	Poseidoniales	Thalassoarchaeaceae	MGIIb-O2	unknown	0	0	0	0	0	0	0	0	0	0	0	0	0	0	0	0	0
Posei_229	Archaea	Thermoplasmatota	Poseidoniia	Poseidoniales	Thalassoarchaeaceae	MGIIb-O1	MGIIb-O1sp8684u	0	0	0	0	0	0	0	0	0	0	0	0	0	0	0	0	0
Posei_501	Archaea	Thermoplasmatota	Poseidoniia	Poseidoniales	Thalassoarchaeaceae	Thalassarchaeum	Thalassarchaeumsp002495735	0	0	0	0	0	0	0	0	0	0	0	0	0	0	0	0	0
Posei_502	Archaea	Thermoplasmatota	Poseidoniia	Poseidoniales	Thalassoarchaeaceae	MGIIb-O1	MGIIb-O1sp002498525	0	0	0	0	0	0	0	0	0	0	0	0	0	0	0	0	0
Posei_503	Archaea	Thermoplasmatota	Poseidoniia	Poseidoniales	Thalassoarchaeaceae	MGIIb-O1	MGIIb-O1sp002498525	0	0	0	0	0	0	0	0	0	0	0	0	0	0	0	0	0
Posei_504	Archaea	Thermoplasmatota	Poseidoniia	Poseidoniales	Thalassoarchaeaceae	Thalassarchaeum	Thalassarchaeumsp002495735	0	0	0	0	0	0	0	0	0	0	0	0	0	0	0	0	0
Posei_505	Archaea	Thermoplasmatota	Poseidoniia	Poseidoniales	Thalassoarchaeaceae	MGIIb-O2	unknown	0	0	0	0	0	0	0	0	0	0	0	0	0	0	0	0	0
Posei_506	Archaea	Thermoplasmatota	Poseidoniia	Poseidoniales	Thalassoarchaeaceae	MGIIb-O1	MGIIb-O1sp002498525	0	0	0	0	0	0	0	0	0	0	0	0	0	0	0	0	0
Posei_507	Archaea	Thermoplasmatota	Poseidoniia	Poseidoniales	Thalassoarchaeaceae	Thalassarchaeum	Thalassarchaeumsp002495735	0	0	0	0	0	0	0	0	0	0	0	0	0	0	0	0	0
Posei_508	Archaea	Thermoplasmatota	Poseidoniia	Poseidoniales	Thalassoarchaeaceae	MGIIb-P	unknown	0	0	0	0	0	0	0	0	0	0	0	0	0	0	0	0	0
Posei_509	Archaea	Thermoplasmatota	Poseidoniia	Poseidoniales	Thalassoarchaeaceae	Thalassarchaeum	Thalassarchaeumsp002495735	0	0	0	0	0	0	0	0	0	0	0	0	0	0	0	0	0
Posei_510	Archaea	Thermoplasmatota	Poseidoniia	MGIII	CG-Epi1	CG-Epi1	unknown	0	0	0	0	0	0	0	0	1	0	0	0	0	0	0	0	0
Posei_511	Archaea	Thermoplasmatota	Poseidoniia	Poseidoniales	Thalassoarchaeaceae	Thalassarchaeum	Thalassarchaeumsp002495735	0	0	0	0	0	0	0	0	0	0	0	0	0	0	0	0	0
Posei_512	Archaea	Thermoplasmatota	Poseidoniia	Poseidoniales	Thalassoarchaeaceae	MGIIb-O1	MGIIb-O1sp8684u	0	0	0	0	0	0	0	0	0	0	0	0	0	0	0	0	0
Posei_513	Archaea	Thermoplasmatota	Poseidoniia	Poseidoniales	Thalassoarchaeaceae	Thalassarchaeum	unknown	0	0	0	0	0	0	0	0	0	0	0	0	0	0	0	0	0
Posei_514	Archaea	Thermoplasmatota	Poseidoniia	Poseidoniales	Thalassoarchaeaceae	Thalassarchaeum	unknown	0	0	0	0	0	0	0	0	0	0	0	0	0	0	0	0	0
Posei_515	Archaea	Thermoplasmatota	Poseidoniia	Poseidoniales	Thalassoarchaeaceae	MGIIb-O1	MGIIb-O1sp8684u	0	0	0	0	0	0	0	0	0	0	0	0	0	0	0	0	0
Posei_516	Archaea	Thermoplasmatota	Poseidoniia	Poseidoniales	Thalassoarchaeaceae	Thalassarchaeum	unknown	0	0	0	0	0	0	0	0	0	0	0	0	0	0	0	0	0
Posei_517	Archaea	Thermoplasmatota	Poseidoniia	Poseidoniales	Thalassoarchaeaceae	Thalassarchaeum	Thalassarchaeumsp002495735	0	0	0	0	0	0	0	0	0	0	0	0	0	0	0	0	0
Posei_518	Archaea	Thermoplasmatota	Poseidoniia	Poseidoniales	Thalassoarchaeaceae	MGIIb-O2	unknown	0	0	0	0	0	0	0	0	0	0	0	0	0	0	0	0	0
Posei_519	Archaea	Thermoplasmatota	Poseidoniia	Poseidoniales	Thalassoarchaeaceae	MGIIb-P	unknown	0	0	0	0	0	0	0	0	0	0	0	0	0	0	0	0	0
Posei_520	Archaea	Thermoplasmatota	Poseidoniia	Poseidoniales	Thalassoarchaeaceae	Thalassarchaeum	Thalassarchaeumsp002507125	0	0	0	0	0	0	0	0	0	0	0	0	0	0	0	0	0
Posei_521	Archaea	Thermoplasmatota	Poseidoniia	Poseidoniales	Thalassoarchaeaceae	MGIIb-O1	MGIIb-O1sp002498525	0	0	0	0	0	0	0	0	0	0	0	1	0	0	0	0	0
Posei_522	Archaea	Thermoplasmatota	Poseidoniia	Poseidoniales	Thalassoarchaeaceae	Thalassarchaeum	Thalassarchaeumsp002495735	0	0	0	0	0	0	0	0	0	0	0	0	0	0	0	0	0
Posei_523	Archaea	Thermoplasmatota	Poseidoniia	Poseidoniales	Thalassoarchaeaceae	MGIIb-O1	MGIIb-O1sp002498525	0	0	0	0	0	0	0	0	0	0	0	0	0	0	0	0	0
Posei_524	Archaea	Thermoplasmatota	Poseidoniia	Poseidoniales	Thalassoarchaeaceae	MGIIb-O2	unknown	0	0	0	0	0	0	0	0	0	0	0	0	0	0	0	0	0
Posei_525	Archaea	Thermoplasmatota	Poseidoniia	Poseidoniales	Thalassoarchaeaceae	Thalassarchaeum	Thalassarchaeumsp002495735	0	0	0	0	0	0	0	0	0	0	0	0	0	0	0	0	0
Posei_526	Archaea	Thermoplasmatota	Poseidoniia	Poseidoniales	Thalassoarchaeaceae	MGIIb-O1	MGIIb-O1sp002498525	0	0	0	0	0	0	0	0	0	0	0	0	0	0	0	0	0
Posei_527	Archaea	Thermoplasmatota	Poseidoniia	Poseidoniales	Thalassoarchaeaceae	Thalassarchaeum	Thalassarchaeumsp002495735	0	0	0	0	0	0	0	0	0	0	0	0	0	0	0	0	0
Posei_528	Archaea	Thermoplasmatota	Poseidoniia	Poseidoniales	Thalassoarchaeaceae	Thalassarchaeum	Thalassarchaeumsp002507125	0	0	0	0	0	0	0	0	0	0	0	0	0	0	0	0	0
Posei_d01	Archaea	Thermoplasmatota	Poseidoniia	Poseidoniales	Thalassoarchaeaceae	MGIIb-O1	MGIIb-O1sp002498525	0	0	0	0	0	0	0	0	0	0	0	0	0	0	0	0	0
Posei_d02	Archaea	Thermoplasmatota	Poseidoniia	MGIII	CG-Epi1	UBA8886	UBA8886sp003193815	0	0	0	0	0	0	0	0	0	0	0	0	0	0	0	0	0
Posei_d03	Archaea	Thermoplasmatota	Poseidoniia	Poseidoniales	Poseidoniaceae	UBA60	UBA60sp002503395	0	0	0	0	0	0	0	0	0	0	0	0	0	0	0	0	0
Posei_d04	Archaea	Thermoplasmatota	Poseidoniia	MGIII	CG-Epi1	CG-Epi1	unknown	0	0	0	0	0	0	0	0	0	0	0	0	0	0	0	0	0
Posei_d05	Archaea	Thermoplasmatota	Poseidoniia	MGIII	CG-Epi1	UBA8886	unknown	0	0	0	0	0	0	0	0	0	0	0	0	0	0	0	0	0
Posei_d06	Archaea	Thermoplasmatota	Poseidoniia	Poseidoniales	Thalassoarchaeaceae	MGIIb-O1	MGIIb-O1sp002498525	0	0	0	0	0	0	0	0	0	0	0	0	0	0	0	0	0
Posei_d07	Archaea	Thermoplasmatota	Poseidoniia	MGIII	CG-Epi1	UBA8886	UBA8886sp003193815	0	0	0	0	0	0	0	0	0	0	0	0	0	0	0	0	0
Posei_d08	Archaea	Thermoplasmatota	Poseidoniia	Poseidoniales	Thalassoarchaeaceae	MGIIb-O1	MGIIb-O1sp002498525	0	0	0	0	0	0	0	0	0	0	0	0	0	0	0	0	0
Posei_d10	Archaea	Thermoplasmatota	Poseidoniia	Poseidoniales	Poseidoniaceae	UBA60	unknown	0	0	0	0	0	0	0	0	0	0	0	0	0	0	0	0	0
Posei_d11	Archaea	Thermoplasmatota	Poseidoniia	Poseidoniales	Thalassoarchaeaceae	unknown	unknown	0	0	0	0	0	0	0	0	0	0	0	0	0	0	0	0	0
Posei_d12	Archaea	Thermoplasmatota	Poseidoniia	Poseidoniales	Thalassoarchaeaceae	MGIIb-O1	MGIIb-O1sp002498525	0	0	0	0	0	0	0	0	0	0	0	0	0	0	0	0	0
Posei_d13	Archaea	Thermoplasmatota	Poseidoniia	MGIII	CG-Epi1	CG-Epi1	unknown	0	0	0	0	0	0	0	0	0	0	0	0	0	0	0	0	0
Posei_d14	Archaea	Thermoplasmatota	Poseidoniia	MGIII	CG-Epi1	UBA8886	UBA8886sp003193815	0	0	0	0	0	0	0	0	0	0	0	0	0	0	0	0	0
Posei_d15	Archaea	Thermoplasmatota	Poseidoniia	Poseidoniales	Poseidoniaceae	MGIIa-L1	unknown	0	0	0	0	0	0	0	0	0	0	0	0	0	0	0	0	0
Posei_d16	Archaea	Thermoplasmatota	Poseidoniia	Poseidoniales	Poseidoniaceae	unknown	unknown	0	0	0	0	0	0	0	0	0	0	0	0	0	0	0	0	0
Posei_d17	Archaea	Thermoplasmatota	Poseidoniia	MGIII	CG-Epi1	UBA8886	UBA8886sp003193815	0	0	0	0	0	0	0	0	0	0	0	0	0	0	0	0	0
Posei_d18	Archaea	Thermoplasmatota	Poseidoniia	Poseidoniales	Thalassoarchaeaceae	MGIIb-O1	MGIIb-O1sp002498525	0	0	0	0	0	0	0	0	0	0	0	0	0	0	0	0	0
Posei_d19	Archaea	Thermoplasmatota	Poseidoniia	Poseidoniales	Poseidoniaceae	UBA60	UBA60sp002503395	0	0	0	0	0	0	0	0	0	0	0	0	0	0	0	0	0
Posei_d20	Archaea	Thermoplasmatota	Poseidoniia	Poseidoniales	Poseidoniaceae	MGIIa-L1	unknown	0	0	0	0	0	0	0	0	0	0	0	0	0	0	0	0	0
Posei_d21	Archaea	Thermoplasmatota	Poseidoniia	MGIII	CG-Epi1	CG-Epi1	unknown	0	0	0	0	0	0	0	0	0	0	0	0	0	0	0	0	0
Posei_d22	Archaea	Thermoplasmatota	Poseidoniia	Poseidoniales	Thalassoarchaeaceae	MGIIb-O1	MGIIb-O1sp002498525	0	0	0	0	0	0	0	0	0	0	0	0	0	0	0	0	0
SAR324_1501	Bacteria	SAR324	SAR324	SAR324	NAC60-12	Arctic96AD-7	Arctic96AD-7sp002082305	0	0	0	0	1	0	1	0	0	0	0	1	0	0	0	0	1
SAR324_1502	Bacteria	SAR324	SAR324	SAR324	NAC60-12	Arctic96AD-7	Arctic96AD-7sp002082305	0	0	0	0	1	0	1	0	0	0	0	0	0	0	0	0	0
SAR324_1503	Bacteria	SAR324	SAR324	SAR324	NAC60-12	Arctic96AD-7	Arctic96AD-7sp002082305	0	0	0	0	1	0	1	0	0	0	0	1	0	0	0	0	1
SAR324_1504	Bacteria	SAR324	SAR324	SAR324	NAC60-12	Arctic96AD-7	Arctic96AD-7sp002082305	0	0	0	0	1	0	1	0	0	0	0	1	0	0	0	0	1
SAR324_1505	Bacteria	SAR324	SAR324	SAR324	NAC60-12	UBA8110	unknown	0	0	0	0	0	0	0	0	0	0	0	0	0	0	0	0	0
SAR324_1506	Bacteria	SAR324	SAR324	SAR324	NAC60-12	Arctic96AD-7	Arctic96AD-7sp002082305	0	0	0	0	0	0	1	0	0	0	0	1	0	0	0	0	0
SAR324_1507	Bacteria	SAR324	SAR324	SAR324	NAC60-12	Arctic96AD-7	Arctic96AD-7sp002082305	0	0	0	0	0	0	0	0	0	0	0	0	0	0	0	0	0
SAR324_1508	Bacteria	SAR324	SAR324	SAR324	NAC60-12	Arctic96AD-7	Arctic96AD-7sp002082305	0	0	0	0	1	0	1	0	0	0	0	0	0	0	0	0	1
SAR324_201	Bacteria	SAR324	SAR324	SAR324	NAC60-12	Arctic96AD-7	Arctic96AD-7sp002082305	0	0	0	0	1	0	1	0	0	0	0	0	0	0	0	0	1
SAR324_202	Bacteria	SAR324	SAR324	SAR324	NAC60-12	Arctic96AD-7	Arctic96AD-7sp002082305	0	0	0	0	0	0	1	0	0	0	0	0	0	0	0	0	0
SAR324_203	Bacteria	SAR324	SAR324	SAR324	NAC60-12	Arctic96AD-7	Arctic96AD-7sp002082305	0	0	0	0	1	0	1	0	0	0	0	0	0	0	0	0	1
SAR324_204	Bacteria	SAR324	SAR324	SAR324	NAC60-12	Arctic96AD-7	Arctic96AD-7sp002082305	0	0	0	0	1	0	1	0	0	0	0	0	0	0	0	0	1
SAR324_205	Bacteria	SAR324	SAR324	SAR324	NAC60-12	Arctic96AD-7	Arctic96AD-7sp002082305	0	0	0	0	0	0	1	0	0	0	0	0	0	0	0	0	0
SAR324_206	Bacteria	SAR324	SAR324	SAR324	NAC60-12	Arctic96AD-7	Arctic96AD-7sp002082305	0	0	0	0	1	0	1	0	0	0	0	0	0	0	0	0	1
SAR324_207	Bacteria	SAR324	SAR324	SAR324	NAC60-12	UBA8110	unknown	0	0	0	0	0	0	0	0	0	0	0	0	0	0	0	0	0
SAR324_208	Bacteria	SAR324	SAR324	SAR324	NAC60-12	Arctic96AD-7	Arctic96AD-7sp002082305	0	0	0	0	1	0	1	0	0	0	0	0	0	0	0	0	1
SAR324_209	Bacteria	SAR324	SAR324	SAR324	NAC60-12	Arctic96AD-7	Arctic96AD-7sp002082305	0	0	0	0	0	0	1	0	0	0	0	0	0	0	0	0	0
SAR324_210	Bacteria	SAR324	SAR324	SAR324	NAC60-12	Arctic96AD-7	Arctic96AD-7sp002082305	0	0	0	0	0	0	0	0	0	0	0	0	0	0	0	0	0
SAR324_211	Bacteria	SAR324	SAR324	SAR324	NAC60-12	Arctic96AD-7	Arctic96AD-7sp002082305	0	0	0	0	0	0	0	0	0	0	0	0	0	0	0	0	0
SAR324_212	Bacteria	SAR324	SAR324	SAR324	NAC60-12	Arctic96AD-7	Arctic96AD-7sp002082305	0	0	0	0	0	0	0	0	0	0	0	0	0	0	0	0	0
SAR324_213	Bacteria	SAR324	SAR324	SAR324	NAC60-12	Arctic96AD-7	Arctic96AD-7sp002082305	0	0	0	0	1	0	1	0	0	0	0	0	0	0	0	0	1
SAR324_214	Bacteria	SAR324	SAR324	SAR324	NAC60-12	Arctic96AD-7	Arctic96AD-7sp002082305	0	0	0	0	1	0	0	0	0	0	0	0	0	0	0	0	0
SAR324_215	Bacteria	SAR324	SAR324	SAR324	NAC60-12	UBA8110	unknown	0	0	0	0	0	0	0	0	0	0	0	0	0	0	0	0	0
SAR324_216	Bacteria	SAR324	SAR324	SAR324	NAC60-12	Arctic96AD-7	Arctic96AD-7sp002082305	0	0	0	0	1	0	1	0	0	0	0	0	0	0	0	0	1
SAR324_501	Bacteria	SAR324	SAR324	SAR324	NAC60-12	Arctic96AD-7	Arctic96AD-7sp002082305	0	0	0	0	1	0	1	0	0	0	0	0	0	0	0	0	1
SAR324_502	Bacteria	SAR324	SAR324	SAR324	NAC60-12	Arctic96AD-7	Arctic96AD-7sp002082305	0	0	0	0	1	0	0	0	0	0	0	0	0	0	0	0	1
SAR324_503	Bacteria	SAR324	SAR324	SAR324	NAC60-12	UBA8110	UBA8110sp002707655	0	0	0	0	0	0	0	0	0	0	0	0	0	0	0	0	0
SAR324_504	Bacteria	SAR324	SAR324	SAR324	NAC60-12	UBA8110	unknown	0	0	0	0	0	0	0	0	0	0	0	0	0	0	0	0	0
SAR324_505	Bacteria	SAR324	SAR324	SAR324	NAC60-12	Arctic96AD-7	Arctic96AD-7sp002082305	0	0	0	0	1	0	1	0	0	0	0	0	0	0	0	0	1
SAR324_506	Bacteria	SAR324	SAR324	SAR324	NAC60-12	UBA8110	unknown	0	0	0	0	0	0	0	0	0	0	0	0	0	0	0	0	0
SAR324_507	Bacteria	SAR324	SAR324	SAR324	NAC60-12	Arctic96AD-7	Arctic96AD-7sp002082305	0	0	0	0	1	0	1	0	0	0	0	0	0	0	0	0	1
SAR324_508	Bacteria	SAR324	SAR324	SAR324	NAC60-12	Arctic96AD-7	Arctic96AD-7sp002082305	0	0	0	0	0	0	1	0	0	0	0	0	0	0	0	0	0
SAR324_509	Bacteria	SAR324	SAR324	SAR324	NAC60-12	Arctic96AD-7	Arctic96AD-7sp002082305	0	0	0	0	1	0	1	0	0	0	0	0	0	0	0	0	0
SAR324_510	Bacteria	SAR324	SAR324	SAR324	NAC60-12	Arctic96AD-7	Arctic96AD-7sp002082305	0	0	0	0	1	0	1	0	0	0	0	0	0	0	0	0	1
SAR324_511	Bacteria	SAR324	SAR324	SAR324	NAC60-12	UBA8110	UBA8110sp002707655	0	0	0	0	0	0	0	0	0	0	0	0	0	0	0	0	0
SAR324_512	Bacteria	SAR324	SAR324	SAR324	NAC60-12	Arctic96AD-7	Arctic96AD-7sp002082305	0	0	0	0	0	0	1	0	0	0	0	0	0	0	0	0	0
SAR324_513	Bacteria	SAR324	SAR324	SAR324	NAC60-12	Arctic96AD-7	Arctic96AD-7sp002082305	0	0	0	0	1	0	1	0	0	0	0	0	0	0	0	0	1
SAR324_515	Bacteria	SAR324	SAR324	SAR324	NAC60-12	Arctic96AD-7	Arctic96AD-7 sp002082305	0	0	0	0	1	0	1	0	0	0	0	0	0	0	0	0	1
SAR324_516	Bacteria	SAR324	SAR324	SAR324	NAC60-12	UBA8110	unknown	0	0	0	0	0	0	0	0	0	0	0	0	0	0	0	0	0
SAR324_517	Bacteria	SAR324	SAR324	SAR324	NAC60-12	Arctic96AD-7	Arctic96AD-7sp002082305	0	0	0	0	1	0	1	0	0	0	0	0	0	0	0	0	1
SAR324_518	Bacteria	SAR324	SAR324	SAR324	NAC60-12	Arctic96AD-7	Arctic96AD-7sp002082305	0	0	0	0	0	0	0	0	0	0	0	0	0	0	0	0	0
SAR324_519	Bacteria	SAR324	SAR324	SAR324	NAC60-12	Arctic96AD-7	Arctic96AD-7sp002082305	0	0	0	0	1	0	0	0	0	0	1	0	0	0	0	0	1
SAR324_520	Bacteria	SAR324	SAR324	SAR324	NAC60-12	Arctic96AD-7	Arctic96AD-7sp002082305	0	0	0	0	1	0	1	0	0	0	0	0	0	0	0	0	1
SAR324_521	Bacteria	SAR324	SAR324	SAR324	NAC60-12	Arctic96AD-7	Arctic96AD-7sp002082305	0	0	0	0	1	0	1	0	0	0	0	0	0	0	0	0	1
SAR324_522	Bacteria	SAR324	SAR324	SAR324	NAC60-12	UBA8110	UBA8110sp002707655	0	0	0	0	0	0	0	0	0	0	0	0	0	0	0	0	0
SAR324_d01	Bacteria	SAR324	SAR324	SAR324	NAC60-12	Arctic96AD-7	Arctic96AD-7 sp002082305	0	0	0	0	1	0	0	0	0	0	0	0	0	0	0	0	1
SAR324_d02	Bacteria	SAR324	SAR324	SAR324	NAC60-12	UBA8110	unknown	0	0	0	0	0	0	0	0	0	0	0	0	0	0	0	0	0
SAR324_d03	Bacteria	SAR324	SAR324	SAR324	NAC60-12	Arctic96AD-7	unknown	0	0	0	0	0	0	0	0	0	0	0	0	0	0	0	0	0
SAR324_d04	Bacteria	SAR324	SAR324	SAR324	NAC60-12	Arctic96AD-7	Arctic96AD-7sp002082305	0	0	0	0	1	0	0	0	0	0	0	0	0	1	0	0	1
SAR324_d05	Bacteria	SAR324	SAR324	SAR324	NAC60-12	Arctic96AD-7	unknown	0	0	0	0	0	0	0	0	0	0	0	0	0	0	0	0	0
SAR324_d06	Bacteria	SAR324	SAR324	SAR324	NAC60-12	Arctic96AD-7	Arctic96AD-7sp002082305	0	0	0	0	1	0	0	0	0	0	0	0	0	0	0	0	1
SAR324_d07	Bacteria	SAR324	SAR324	SAR324	NAC60-12	Arctic96AD-7	unknown	0	0	0	0	0	0	0	0	0	0	0	0	0	0	0	0	0
SAR324_d08	Bacteria	SAR324	SAR324	SAR324	NAC60-12	Arctic96AD-7	unknown	0	0	0	0	0	0	0	0	0	0	0	0	0	0	0	0	0
SAR324_d09	Bacteria	SAR324	SAR324	SAR324	NAC60-12	Arctic96AD-7	Arctic96AD-7sp002082305	0	0	0	0	1	0	0	0	0	0	0	0	0	0	0	0	1
SAR324_d10	Bacteria	SAR324	SAR324	SAR324	NAC60-12	Arctic96AD-7	unknown	0	0	0	0	0	0	1	0	0	0	0	1	0	0	0	0	0
UBA8108_1501	Bacteria	Planctomycetota	UBA8108	UBA8108	UBA8108	UBA8108	unknown	0	0	0	0	0	0	1	1	0	0	0	0	0	0	0	0	0
UBA8108_1502	Bacteria	Planctomycetota	UBA8108	UBA8108	UBA8108	UBA8108	unknown	0	0	0	0	0	0	1	1	0	0	0	1	0	0	0	0	0
UBA8108_501	Bacteria	Planctomycetota	UBA8108	UBA8108	UBA8108	UBA8108	UBA8108sp003509045	0	0	0	0	0	0	0	0	0	0	0	0	0	0	0	0	0
UBA8108_502	Bacteria	Planctomycetota	UBA8108	UBA8108	UBA8108	UBA8108	UBA8108sp003509045	0	0	0	0	0	0	0	0	0	0	0	0	0	0	0	0	0
UBA890_501	Bacteria	Acidobacteriota	UBA890	UBA890	UBA890	UBA890	unknown	0	0	0	1	1	0	1	0	0	0	1	1	1	0	0	0	1
Verru_1501	Bacteria	Verrucomicrobiota	Verrucomicrobiae	Pedosphaerales	UBA1096	UBA1096	unknown	0	0	1	0	0	1	1	0	0	0	0	1	1	0	0	0	0
Verru_1502	Bacteria	Verrucomicrobiota	Verrucomicrobiae	Pedosphaerales	UBA1096	UBA1096	unknown	0	0	1	0	0	1	1	0	0	0	0	0	1	0	0	0	0
Verru_1503	Bacteria	Verrucomicrobiota	Verrucomicrobiae	Pedosphaerales	UBA1096	UBA1096	unknown	0	0	1	0	0	1	1	0	0	0	0	0	0	1	0	0	0
Verru_1504	Bacteria	Verrucomicrobiota	Verrucomicrobiae	Pedosphaerales	UBA1096	UBA1096	unknown	0	0	1	0	0	1	1	0	0	0	0	0	0	0	1	0	0
Verru_1505	Bacteria	Verrucomicrobiota	Verrucomicrobiae	Pedosphaerales	UBA1096	UBA1096	unknown	0	0	1	0	0	0	1	0	0	0	0	0	0	0	0	0	0
Verru_1506	Bacteria	Verrucomicrobiota	Verrucomicrobiae	Pedosphaerales	UBA1096	UBA1096	unknown	0	0	1	0	0	1	1	0	0	0	0	0	0	0	0	0	0
Verru_1507	Bacteria	Verrucomicrobiota	Verrucomicrobiae	Pedosphaerales	UBA1096	UBA1096	unknown	0	0	1	0	0	1	1	0	0	0	0	0	1	1	0	0	0
Verru_201	Bacteria	Verrucomicrobiota	Verrucomicrobiae	Pedosphaerales	UBA1096	UBA1096	unknown	0	0	0	0	0	0	0	0	0	0	0	0	0	0	0	0	0
Verru_202	Bacteria	Verrucomicrobiota	Verrucomicrobiae	Pedosphaerales	UBA1096	UBA1096	unknown	0	0	0	1	0	0	0	0	0	0	0	0	0	0	1	0	0
Verru_203	Bacteria	Verrucomicrobiota	Verrucomicrobiae	Pedosphaerales	UBA1096	UBA1096	unknown	0	0	1	0	1	1	1	0	0	0	0	0	1	0	0	0	0
Verru_204	Bacteria	Verrucomicrobiota	Verrucomicrobiae	Pedosphaerales	UBA1100	unknown	unknown	0	0	0	0	0	0	0	0	0	0	0	0	0	0	0	0	0
Verru_205	Bacteria	Verrucomicrobiota	Verrucomicrobiae	Pedosphaerales	UBA1096	UBA1096	unknown	0	0	1	0	0	1	1	0	0	0	1	1	1	0	1	0	0
Verru_206	Bacteria	Verrucomicrobiota	Verrucomicrobiae	Pedosphaerales	UBA1096	UBA1096	unknown	0	0	1	0	0	1	1	0	0	0	0	1	1	1	1	0	0
Verru_207	Bacteria	Verrucomicrobiota	Verrucomicrobiae	Pedosphaerales	UBA1096	UBA1096	unknown	0	0	1	0	0	0	1	0	0	0	0	1	0	0	0	0	0
Verru_208	Bacteria	Verrucomicrobiota	Verrucomicrobiae	Pedosphaerales	UBA1100	unknown	unknown	0	0	0	0	0	0	0	0	1	1	0	0	0	1	0	0	0
Verru_209	Bacteria	Verrucomicrobiota	Verrucomicrobiae	Opitutales	MB11C04	GCA-2730975	unknown	0	0	0	0	0	0	0	0	0	0	0	1	0	0	0	0	0
Verru_210	Bacteria	Verrucomicrobiota	Verrucomicrobiae	Verrucomicrobiales	Akkermansiaceae	unknown	unknown	0	0	0	1	0	0	0	0	0	0	1	1	1	1	0	0	1
Verru_211	Bacteria	Verrucomicrobiota	Verrucomicrobiae	Opitutales	MB11C04	GCA-2730975	unknown	0	0	0	0	0	0	1	0	0	0	1	1	0	0	0	0	0
Verru_212	Bacteria	Verrucomicrobiota	Verrucomicrobiae	Pedosphaerales	UBA1100	unknown	unknown	0	0	0	0	0	0	0	0	0	0	0	0	0	0	0	0	0
Verru_213	Bacteria	Verrucomicrobiota	Verrucomicrobiae	Opitutales	MB11C04	GCA-2730975	unknown	0	0	0	0	1	0	1	0	0	0	0	1	0	0	0	0	0
Verru_214	Bacteria	Verrucomicrobiota	Verrucomicrobiae	Pedosphaerales	UBA1100	unknown	unknown	0	0	0	0	0	0	0	0	1	0	0	0	0	0	0	0	0
Verru_215	Bacteria	Verrucomicrobiota	Verrucomicrobiae	Pedosphaerales	UBA1096	UBA1096	unknown	0	0	1	0	1	1	1	0	0	0	1	0	0	0	1	0	1
Verru_216	Bacteria	Verrucomicrobiota	Verrucomicrobiae	Pedosphaerales	UBA1096	UBA1096	unknown	0	0	1	0	0	1	1	0	0	0	0	1	1	0	0	0	0
Verru_217	Bacteria	Verrucomicrobiota	Verrucomicrobiae	Verrucomicrobiales	Akkermansiaceae	unknown	unknown	0	0	0	0	0	0	0	0	1	0	0	0	0	0	0	0	1
Verru_218	Bacteria	Verrucomicrobiota	Verrucomicrobiae	Pedosphaerales	UBA1100	unknown	unknown	0	0	0	0	0	0	0	0	0	0	0	0	0	1	0	0	0
Verru_219	Bacteria	Verrucomicrobiota	Verrucomicrobiae	Pedosphaerales	UBA1096	UBA1096	unknown	0	0	1	0	0	1	1	0	0	0	0	0	0	0	0	0	0
Verru_501	Bacteria	Verrucomicrobiota	Verrucomicrobiae	Pedosphaerales	UBA1096	UBA1096	unknown	0	0	1	0	0	1	1	0	0	0	0	1	0	0	0	0	0
Verru_502	Bacteria	Verrucomicrobiota	Verrucomicrobiae	Pedosphaerales	UBA1096	UBA1096	unknown	0	0	1	0	0	1	1	0	0	0	0	0	1	0	1	0	0
Verru_503	Bacteria	Verrucomicrobiota	Verrucomicrobiae	Pedosphaerales	UBA1096	UBA1096	unknown	0	0	1	0	0	1	1	0	0	0	0	1	1	1	1	0	0
Verru_504	Bacteria	Verrucomicrobiota	Verrucomicrobiae	Pedosphaerales	UBA1096	UBA1096	unknown	0	0	1	0	0	1	1	0	0	0	0	1	1	1	1	0	0
Verru_505	Bacteria	Verrucomicrobiota	Verrucomicrobiae	Pedosphaerales	UBA1096	UBA1096	unknown	0	0	1	0	0	0	0	0	0	0	0	1	0	0	0	0	0
Verru_506	Bacteria	Verrucomicrobiota	Verrucomicrobiae	Pedosphaerales	UBA1096	UBA1096	unknown	0	0	1	0	0	1	1	0	0	0	0	1	1	1	1	0	0
Verru_507	Bacteria	Verrucomicrobiota	Verrucomicrobiae	Pedosphaerales	UBA1100	unknown	unknown	0	0	0	0	0	0	0	0	0	0	0	0	0	0	0	0	0
Verru_508	Bacteria	Verrucomicrobiota	Verrucomicrobiae	Pedosphaerales	UBA1096	UBA1096	unknown	0	0	1	0	0	1	1	0	0	0	0	1	1	0	1	0	0
Verru_509	Bacteria	Verrucomicrobiota	Verrucomicrobiae	Pedosphaerales	UBA1096	UBA1096	unknown	0	0	1	0	1	1	1	0	0	0	0	1	1	0	1	0	0
Verru_510	Bacteria	Verrucomicrobiota	Verrucomicrobiae	Opitutales	MB11C04	GCA-2730975	unknown	0	0	0	0	0	0	0	0	1	1	0	1	0	0	0	0	0
Verru_511	Bacteria	Verrucomicrobiota	Verrucomicrobiae	Pedosphaerales	UBA1100	unknown	unknown	0	0	0	0	0	0	0	0	0	0	0	0	0	0	0	0	0
Verru_512	Bacteria	Verrucomicrobiota	Verrucomicrobiae	Pedosphaerales	UBA1100	unknown	unknown	0	0	0	0	0	0	0	0	1	0	0	0	0	1	0	0	0
Verru_513	Bacteria	Verrucomicrobiota	Verrucomicrobiae	Verrucomicrobiales	Akkermansiaceae	unknown	unknown	0	0	0	0	0	0	0	0	1	0	0	0	1	0	1	1	0
Verru_514	Bacteria	Verrucomicrobiota	Verrucomicrobiae	Pedosphaerales	UBA1096	UBA1096	unknown	0	0	1	0	0	1	1	0	0	0	0	1	1	0	1	0	0
Verru_515	Bacteria	Verrucomicrobiota	Verrucomicrobiae	Pedosphaerales	UBA1096	UBA1096	unknown	0	0	1	0	0	1	1	0	0	0	0	1	0	0	0	0	0
Verru_516	Bacteria	Verrucomicrobiota	Verrucomicrobiae	Pedosphaerales	UBA1096	UBA1096	unknown	0	0	0	0	0	0	0	0	0	0	0	1	0	0	0	0	0
Verru_517	Bacteria	Verrucomicrobiota	Verrucomicrobiae	Pedosphaerales	UBA1096	UBA1096	unknown	0	0	1	0	0	1	1	0	0	0	0	1	1	1	0	0	0
Verru_d01	Bacteria	Verrucomicrobiota	Verrucomicrobiae	Pedosphaerales	UBA1100	unknown	unknown	0	0	0	0	0	0	0	0	0	0	0	0	0	0	0	0	0
Verru_d02	Bacteria	Verrucomicrobiota	Verrucomicrobiae	Verrucomicrobiales	Akkermansiaceae	unknown	unknown	0	0	0	1	1	0	0	0	0	1	1	1	1	0	0	0	1
Verru_d03	Bacteria	Verrucomicrobiota	Verrucomicrobiae	Verrucomicrobiales	Akkermansiaceae	unknown	unknown	0	0	1	1	1	0	0	0	0	1	0	1	0	1	0	1	1
Verru_d04	Bacteria	Verrucomicrobiota	Verrucomicrobiae	Pedosphaerales	UBA1096	UBA1096	unknown	0	0	1	0	0	1	0	0	0	0	0	0	0	0	1	0	0
Verru_d05	Bacteria	Verrucomicrobiota	Verrucomicrobiae	Verrucomicrobiales	Akkermansiaceae	unknown	unknown	0	0	0	1	1	0	0	0	0	1	1	1	1	1	0	0	1

## Sheet: Supp. Table 6
Gene	Pathway	Metabolism	KO	Acidi_1501	Acidi_1502	Acidi_1503	Acidi_1504	Acidi_1506	Acidi_1507	Acidi_201	Acidi_202	Acidi_203	Acidi_204	Acidi_205	Acidi_206	Acidi_207	Acidi_208	Acidi_210	Acidi_211	Acidi_212	Acidi_213	Acidi_214	Acidi_215	Acidi_216	Acidi_217	Acidi_218	Acidi_219	Acidi_220	Acidi_221	Acidi_222	Acidi_223	Acidi_224	Acidi_225	Acidi_227	Acidi_228	Acidi_230	Acidi_231	Acidi_501	Acidi_502	Acidi_503	Acidi_504	Acidi_505	Acidi_506	Acidi_507	Acidi_508	Acidi_509	Acidi_511	Acidi_512	Acidi_513
abfD	H-H cycle	Carbon fixationn	K14534	0	0	0	0	0	0	0	0	0	0	0	0	0	0	0	1	1	0	0	0	0	0	0	0	0	0	0	0	0	0	0	0	0	1	0	0	0	0	0	0	0	0	1	0	0	0
coxM	CO metabolism	Oxidation	K03519	1	2	0	2	1	1	1	1	1	1	1	2	1	2	1	2	3	2	2	2	2	2	2	2	1	2	3	2	2	1	2	2	2	2	1	1	2	1	2	1	3	2	2	2	2	2
coxS	CO metabolism	Oxidation	K03518	2	2	2	2	0	2	2	2	2	1	1	1	1	2	2	1	2	2	3	2	2	2	4	4	2	2	1	1	0	2	2	1	2	1	2	1	2	1	1	1	2	1	1	2	2	1
enoyl-CoA h.	H-H cycle	Carbon fixationn	K15016	0	0	0	0	0	0	0	0	0	0	0	0	0	0	0	0	0	0	0	0	0	0	0	0	0	0	0	0	0	0	0	0	0	0	0	0	0	0	0	0	0	0	0	0	0	0
mcl	3H b cycle	Carbon fixationn	K08691	1	1	0	1	0	1	1	1	1	1	1	1	1	1	1	1	1	0	1	1	0	1	1	1	1	1	1	1	1	1	1	0	1	1	1	1	1	1	1	1	1	1	1	1	1	1
mct	3H b cycle	Carbon fixationn	K14470	1	1	1	1	1	1	1	1	1	1	1	1	1	1	1	1	1	1	1	1	1	1	0	1	1	1	0	1	1	0	1	1	1	1	1	1	1	1	1	1	0	1	0	1	1	1
meh	3H b cycle	Carbon fixationn	K09709	0	0	0	0	0	0	0	0	0	0	0	0	0	0	0	0	0	0	0	0	0	0	0	0	0	0	0	0	0	0	0	0	0	0	0	0	0	0	0	0	0	0	0	0	0	0
nxrB	Nitritie oxidation	Oxidation	K00371	0	0	0	0	0	0	0	0	0	0	0	0	0	0	0	0	0	0	0	0	0	0	0	0	0	0	0	0	0	0	0	0	0	0	0	0	0	0	0	0	0	0	0	0	0	0
amoA	Ammonia oxidation	Oxidation	K10944	0	0	0	0	0	0	0	0	0	0	0	0	0	0	0	0	0	0	0	0	0	0	0	0	0	0	0	0	0	0	0	0	0	0	0	0	0	0	0	0	0	0	0	0	0	0
amoB	Ammonia oxidation	Oxidation	K10945	0	0	0	0	0	0	0	0	0	0	0	0	0	0	0	0	0	0	0	0	0	0	0	0	0	0	0	0	0	0	0	0	0	0	0	0	0	0	0	0	0	0	0	0	0	0
amoC	Ammonia oxidation	Oxidation	K10946	0	0	0	0	0	0	0	0	0	0	0	0	0	0	0	0	0	0	0	0	0	0	0	0	0	0	0	0	0	0	0	0	0	0	0	0	0	0	0	0	0	0	0	0	0	0
prkB	Calvin cycle	Carbon fixationn	K00855	0	0	0	0	0	0	0	0	0	0	0	0	0	0	0	0	0	0	0	0	0	0	0	0	0	0	0	0	0	0	0	0	0	0	0	0	0	0	0	0	0	0	0	0	0	0
rbcL	Calvin cycle	Carbon fixationn	K01601	0	0	0	0	0	0	0	0	0	0	0	0	0	0	0	0	0	0	0	0	0	0	0	0	0	0	0	0	0	0	0	0	0	0	0	0	0	0	0	0	0	0	0	0	0	0
rbcS	Calvin cycle	Carbon fixationn	K01602	0	0	0	0	0	0	0	0	0	0	0	0	0	0	0	0	0	0	0	0	0	0	0	0	0	0	0	0	0	0	0	0	0	0	0	0	0	0	0	0	0	0	0	0	0	0
soxA	Thiosulfate oxidation	Oxidation	K17222	0	0	0	0	0	0	0	0	0	0	0	0	0	0	0	0	0	0	0	0	0	0	0	0	0	0	0	0	0	0	0	0	0	0	0	0	0	0	0	0	0	0	0	0	0	0
soxB	Thiosulfate oxidation	Oxidation	K17224	0	0	0	0	0	0	0	0	0	0	0	0	0	0	0	0	0	0	0	0	0	0	0	0	0	0	0	0	0	0	0	0	0	0	0	0	0	0	0	0	0	0	0	0	0	0
soxC	Thiosulfate oxidation	Oxidation	K17225	0	0	0	0	0	0	0	0	0	0	0	0	0	0	0	0	0	0	0	0	0	0	0	0	0	0	0	0	0	0	0	0	0	0	0	0	0	0	0	0	0	0	0	0	0	0
soxX	Thiosulfate oxidation	Oxidation	K17223	0	0	0	0	0	0	0	0	0	0	0	0	0	0	0	0	0	0	0	0	0	0	0	0	0	0	0	0	0	0	0	0	0	0	0	0	0	0	0	0	0	0	0	0	0	0
soxY	Thiosulfate oxidation	Oxidation	K17226	0	0	0	0	0	0	0	0	0	0	0	0	0	0	0	0	0	0	0	0	0	0	0	0	0	0	0	0	0	0	0	0	0	0	0	0	0	0	0	0	0	0	0	0	0	0
soxZ	Thiosulfate oxidation	Oxidation	K17227	0	0	0	0	0	0	0	0	0	0	0	0	0	0	0	0	0	0	0	0	0	0	0	0	0	0	0	0	0	0	0	0	0	0	0	0	0	0	0	0	0	0	0	0	0	0
[truncated: 141 more columns]

## Sheet: Supp. Table 7
CAZymes	Acidi_1506	Acidi_202	Acidi_203	Acidi_206	Acidi_207	Acidi_211	Acidi_213	Acidi_509	Acidi_526	Alpha_1503	Gamma_1503	Gamma_1509	Gamma_1514	Gamma_1519	Gamma_1528	Gamma_224	Gamma_235	Gamma_504	Gamma_514	Gamma_518	Gamma_520	Gamma_538	Gamma_539	Gamma_546	Gamma_549	Gamma_553	Gamma_556	Gamma_561	Gamma_d01	Gamma_d08	Gamma_d15	Gamma_d22	Gamma_d28	SAR324_1507	SAR324_207	SAR324_210	SAR324_211	SAR324_212	SAR324_503	SAR324_d03	SAR324_d05	SAR324_d07	Crenar_1501	Crenar_1504	Crenar_201	Crenar_202	Acidi_1501	Acidi_1502	Acidi_1503
Alpha galactans	0	0	0	0	0	0	0	0	0	0	0	0	0	0	0	0	0	0	0	0	0	0	0	0	0	0	0	0	0	0	0	0	0	0	0	0	0	0	0	0	0	0	0	0	0	0	0	0	0
Alpha mannan	0	0	0	0	0	0	0	0	0	0	0	0	0	0	0	0	0	0	0	0	0	0	0	0	0	0	0	0	0	0	0	0	0	0	0	0	0	0	0	0	0	0	0	0	0	0	0	0	0
Amorphous Cellulose	0	0	0	0	0	0	0	0	0	0	0	0	0	0	0	0	0	0	0	0	0	0	0	0	0	0	0	0	0	0	0	0	0	0	0	0	0	0	0	0	0	0	0	0	0	0	0	0	0
Arabinan	0	0	0	0	0	0	0	0	0	0	0	0	0	0	0	0	0	0	0	0	0	0	0	0	0	0	0	0	0	0	0	0	0	0	0	0	0	0	0	0	0	0	0	0	0	0	0	0	0
Arabinose cleavage	0	0	0	0	0	0	0	0	0	0	0	0	0	0	0	0	0	0	0	0	0	0	0	0	0	0	0	0	0	0	0	0	0	0	0	0	0	0	0	0	0	0	0	0	0	0	1	1	1
Beta mannan	0	0	0	0	0	0	0	0	0	0	0	0	0	0	0	0	0	0	0	0	0	0	0	0	0	0	0	0	0	0	0	0	0	0	0	0	0	0	0	0	0	0	0	0	0	0	0	0	0
Chitin	0	0	0	0	0	0	0	0	0	0	0	0	0	0	0	0	0	0	0	0	0	0	0	0	0	0	0	0	0	0	0	0	0	0	0	0	0	0	0	0	0	0	0	0	0	0	0	0	0
Crystalline Cellulose	0	0	0	0	0	0	0	0	0	0	0	0	0	0	0	0	0	0	0	0	0	0	0	0	0	0	0	0	0	0	0	0	0	0	0	0	0	0	0	0	0	0	0	0	0	0	0	0	0
Fucose Cleavage	0	0	0	0	0	0	0	0	0	0	0	0	0	0	0	0	0	0	0	0	0	0	0	0	0	0	0	0	0	0	0	0	0	0	0	0	0	0	0	0	0	0	0	0	0	0	0	0	0
Mixed Linkage glucans	0	0	0	0	0	0	0	0	0	0	0	0	0	0	0	0	0	0	0	0	0	0	0	0	0	0	0	0	0	0	0	0	0	0	0	0	0	0	0	0	0	0	0	0	0	0	0	0	0
Pectin	0	0	0	0	0	0	0	0	0	0	0	0	0	0	0	0	0	0	0	0	0	0	0	0	0	0	0	0	0	0	0	0	0	0	0	0	0	0	0	0	0	0	0	0	0	0	0	0	0
Polyphenolics	0	0	0	0	0	0	0	0	0	0	0	0	0	0	0	0	0	0	0	0	0	0	0	0	0	0	0	0	0	0	0	0	0	0	0	0	0	0	0	0	0	0	0	0	0	0	0	0	0
Rhamnose cleavage	0	0	0	0	0	0	0	0	0	0	0	0	0	0	0	0	0	0	0	0	0	0	0	0	0	0	0	0	0	0	0	0	0	0	0	0	0	0	0	0	0	0	0	0	0	0	0	0	0
Starch	0	0	0	0	0	0	0	0	0	0	0	0	0	0	0	0	0	0	0	0	0	0	0	0	0	0	0	0	0	0	0	0	0	0	0	0	0	0	0	0	0	0	0	0	0	0	0	0	0
Sulf Polysachharides	0	0	0	0	0	0	0	0	0	0	0	0	0	0	0	0	0	0	0	0	0	0	0	0	0	0	0	0	0	0	0	0	0	0	0	0	0	0	0	0	0	0	0	0	0	0	0	0	0
Xylans	0	0	0	0	0	0	0	0	0	0	0	0	0	0	0	0	0	0	0	0	0	0	0	0	0	0	0	0	0	0	0	0	0	0	0	0	0	0	0	0	0	0	0	0	0	0	0	0	0
Xyloglucan	0	0	0	0	0	0	0	0	0	0	0	0	0	0	0	0	0	0	0	0	0	0	0	0	0	0	0	0	0	0	0	0	0	0	0	0	0	0	0	0	0	0	0	0	0	0	0	0	0
[truncated: 137 more columns]

## Sheet: Supp. Table 8
Metagenome	Season	Depth	Station	Acidi_218	Acidi_512	Acidi_515	Gamma_d15	Gamma_206	Acidi_d02	Acidi_211	Acidi_216	SAR324_1507	Acidi_d05	Acidi_223	SAR324_517	Acidi_529	Gemma_d01	SAR324_510	Gamma_537	Gemma_d06	Acidi_224	Acidi_520	Gamma_539	Gamma_d20	SAR324_d07	SAR324_214	Gamma_1519	Gamma_234	SAR324_213	Gamma_542	SAR324_519	Acidi_527	SAR324_202	Gamma_553	Gamma_225	SAR324_508	Gemma_1507	SAR324_205	Gamma_222	SAR324_501	Gamma_1506	Crenar_1501	Acidi_207	Gamma_514	Acidi_1502	Gamma_219	Crenar_201	Acidi_504	Gamma_561
1	spring	200	MIZ1	0	0	0.00311568	0	0.0163427	0.048308	0.00330356	0.0157623	0.0255491	0.0513199	0.150869	0.0336521	0.0040667	0	0.0271711	0.0166767	0	0.0159524	0	0.0094022	1.13581	0	0.0288309	0	0.249334	0.0391492	0.0801805	0.131817	0.0146855	0.0581244	0.102611	0.0463136	0.0366574	0	0.0442942	0	0.035272	0	1.30842	0.00377242	0.0144779	0.00294619	0	1.14152	0.0149409	0.0192121
2	winter	200	MIZ1	0	0	0	0	0.0301391	0.0253804	0	0.0100167	0.0402656	0.0239103	0.136308	0.0623779	0	0	0.0417702	0.0304757	0	0.0101762	0	0.0188428	1.86283	0.00592014	0.0414432	0	0.68397	0.0673629	0.140276	0.107114	0.00852163	0.0776956	0.175634	0.11828	0.0523756	0	0.075927	0	0.0507362	0	2.27267	0	0.0188171	0	0	2.0796	0.0068192	0.0432144
3	spring	500	MIZ1	0	0	0.0133745	0.0411775	0.0281338	0.191079	0.00483798	0.0412481	0.0976519	0.222036	0.134596	0.0799209	0.00548937	0.0123556	0.0691511	0.0287297	0.0117319	0.0172363	0.00286881	0.0469211	2.55069	0.0163602	0.0742665	0.0564109	0.132329	0.0843734	0.179542	0.137886	0.0254961	0.141147	0.431365	0.0737171	0.0891497	0.0162869	0.0990141	0	0.111766	0.0124768	1.45591	0.0160751	0.0745959	0.0143161	0	1.20809	0.0266098	0.0329254
4	winter	500	MIZ1	0	0	0.00985036	0.040056	0.0286071	0.163491	0.00543173	0.0354628	0.0847482	0.183951	0.147547	0.0720539	0.00609994	0.012742	0.0614681	0.030152	0.0115232	0.0209091	0.00322387	0.0449918	2.1176	0.015393	0.0663462	0.0492114	0.183627	0.0846454	0.141063	0.298385	0.026705	0.119719	0.327967	0.0912383	0.0764479	0.0154234	0.0861142	0	0.0902772	0.0107778	0.945046	0.0115104	0.0663268	0.0104159	0	0.779019	0.0268479	0.0438573
5	spring	200	MIZ2	0	0	0.00973039	0	0.028442	0.14098	0.0069719	0.0444248	0.049612	0.148789	0.386282	0.0604144	0.010059	0	0.0519695	0.028957	0	0.038801	0.00549741	0	1.47991	0	0.0590662	0	0.243207	0.0677626	0.117816	0.144249	0.0384254	0.17433	0.176441	0.094628	0.0725877	0	0.0806969	0	0.0723781	0	0.957941	0.0125384	0.0239179	0.00948887	0	0.794511	0.0393219	0.0539503
6	winter	200	MIZ2	0	0	0.0103641	0.0172638	0.0379086	0.0851439	0.00553437	0.031519	0.045068	0.0957887	0.13772	0.0500687	0.00542535	0.00444535	0.0385042	0.0382143	0.00357874	0.0196593	0.00260922	0.0290428	2.58216	0.00559404	0.041934	0.0332887	0.581636	0.0681938	0.151114	0.172706	0.0208534	0.0745615	0.351632	0.126653	0.049056	0.00807263	0.0625427	0	0.0524863	0.0177892	1.35242	0.0120383	0.0401219	0.0115942	0	1.13971	0.0194966	0.0617707
7	spring	500	MIZ2	0.0212921	0	0.0203146	0.039344	0.0216827	0.293107	0.00531354	0.0619399	0.0893379	0.339191	0.164834	0.0711973	0.0060515	0.0175857	0.0605709	0.0212644	0.0170614	0.0183093	0.00327615	0.044564	1.63056	0.0151787	0.0652032	0.0473864	0.0660731	0.0750091	0.126497	0.161581	0.0293585	0.120429	0.308328	0.0703811	0.0751085	0.023391	0.084928	0	0.0934995	0.0139018	0.705586	0.0253772	0.072421	0.0226599	0	0.579938	0.0378554	0.042074
8	winter	500	MIZ2	0	0	0.00772978	0.0538146	0.0236073	0.152258	0.00481409	0.0340021	0.0751717	0.174826	0.106486	0.0570967	0.00522288	0.0136208	0.0461108	0.0236867	0.0126566	0.0170319	0.00279195	0.0587477	2.28326	0.0129848	0.0470623	0.0630704	0.246539	0.0629106	0.118418	0.234702	0.0337751	0.0767168	0.311205	0.0857417	0.0520195	0.0183693	0.0631134	0	0.0674242	0.0119793	1.00917	0.00933792	0.0770991	0.00813027	0	0.822053	0.0229355	0.0385215
9	spring	200	GT1	0	0	0.00822471	0.0106519	0.041923	0.0742213	0.00655355	0.0388144	0.0556159	0.0776727	0.222504	0.0732432	0.00627842	0	0.0595429	0.0401901	0	0.0242365	0.00318584	0.0236189	2.37439	0.00744282	0.0639313	0.0232707	0.640121	0.081745	0.172024	0.10593	0.0191077	0.122206	0.335106	0.156617	0.0806968	0.00508122	0.100449	0	0.0763447	0.0127637	1.9128	0.00975159	0.0327616	0.00899669	0	1.76454	0.0175491	0.0488867
10	winter	200	GT1	0.0250564	0	0.0152916	0	0.0585158	0.0964611	0.0105296	0.0691537	0.0535196	0.0955636	0.553664	0.078261	0.00893599	0	0.0666204	0.0523401	0	0.0583302	0.00484466	0.0240898	2.40217	0.00753485	0.0729602	0.0205734	0.711725	0.0889354	0.25086	0.114947	0.023671	0.138198	0.357195	0.201831	0.0921603	0	0.113628	0	0.0813232	0.0104227	1.87135	0.0174583	0.0318062	0.0163869	0	1.59222	0.0186367	0.210149
11	spring	500	GT1	0.0256148	0	0.0211469	0.0522735	0.0351205	0.248573	0.00790642	0.0815925	0.0947032	0.279605	0.197082	0.0754916	0.00907087	0.0153934	0.0601482	0.0346375	0.0143825	0.0297519	0.00464568	0.0648556	2.98128	0.0128775	0.062364	0.0822981	0.358164	0.07799	0.166986	0.153989	0.0373517	0.101775	0.454411	0.127732	0.0681294	0.0285878	0.0850657	0	0.087247	0.0312102	1.05024	0.0254733	0.0882946	0.0231905	0	0.840819	0.0372616	0.0589755
12	winter	500	GT1	0	0	0.0176801	0.0421064	0.0381877	0.160748	0.00745374	0.0611376	0.116626	0.180755	0.154506	0.113194	0.0075957	0.0132197	0.0856185	0.0423123	0.0127659	0.0274182	0.00376533	0.0665493	2.59539	0.0146876	0.0881778	0.0709585	0.420597	0.107826	0.225218	0.171917	0.0318713	0.156059	0.461387	0.123605	0.103289	0.0277136	0.120971	0	0.114877	0.0358336	1.14132	0.0211645	0.0738832	0.0197873	0	0.930084	0.030836	0.0723751
13	spring	200	GT3	0.0264592	0	0.0141331	0	0.0583351	0.0509608	0.0155453	0.101163	0.0244498	0.0452658	0.40402	0.0414195	0.0110754	0	0.0322682	0.0195064	0	0.0214012	0.0106457	0.0107879	1.7395	0	0.0329736	0.0119707	0.232964	0.0391192	0.0814057	0.069404	0.0106785	0.0576453	0.231746	0.0882615	0.0411351	0	0.0556171	0	0.0368879	0.00694911	1.59024	0.0223672	0.0231392	0.0151687	0	1.37885	0.00791131	0.0719902
14	winter	200	GT3	0.0201671	0	0.0171211	0.0315867	0.0355631	0.0982842	0.00688399	0.0807043	0.0812732	0.103857	0.166973	0.0724021	0.0072792	0.00735182	0.0733744	0.0262671	0.00674756	0.0246627	0.00438525	0.0483639	2.37232	0.00882187	0.0846921	0.0783969	0.263744	0.0788335	0.192208	0.126171	0.0185573	0.133974	0.593779	0.0715696	0.0921054	0.0187701	0.10711	0	0.0877421	0.0417594	1.30184	0.0202189	0.0701616	0.019173	0	1.00756	0.0162672	0.0805369
15	spring	500	GT3	0.0250715	0	0.0253849	0.00883302	0.0256479	0.118393	0.00650464	0.0957558	0.0522967	0.125572	0.209736	0.0478237	0.00778289	0.00542147	0.0459768	0.0163339	0.00368054	0.0265582	0.0043449	0.0217699	2.55876	0	0.0488141	0.033543	0.11608	0.0501226	0.142243	0.088695	0.0194909	0.0863607	0.312874	0.0580284	0.0588879	0.0130755	0.0686637	0	0.0563398	0.0221973	1.15297	0.0298977	0.0507729	0.0289125	0	0.89934	0.0180797	0.046078
16	winter	500	GT3	0	0	0.00658275	0	0.075349	0.0176951	0.0104063	0.0259963	0.030447	0.0131745	0.192086	0.0508505	0.0058826	0	0.042957	0.0387826	0	0.0143011	0.00519186	0.0190058	1.86115	0.00496433	0.0438518	0.0117447	0.93354	0.054383	0.225417	0.0752487	0.00690258	0.0804999	0.380903	0.127644	0.0576601	0	0.0776513	0	0.0511766	0.00561851	2.2173	0.00738108	0.0209972	0.00703494	0	1.99033	0.0043411	0.244244
17	winter	1500	GT3	0	0	0.00745298	0.125482	0.00766754	0.184948	0	0.0544282	0.117311	0.205351	0.0298587	0.0617363	0.00336799	0.0248766	0.0532026	0.00395775	0.02443	0.0077655	0	0.135403	1.63317	0.021002	0.0444343	0.160231	0.0836417	0.054813	0.054407	0.134528	0.0133973	0.0549204	0.285363	0.0343814	0.043223	0.0447145	0.0579317	0	0.073076	0.0207948	0.246531	0.00876534	0.149677	0.0071043	0	0.16309	0.0125727	0.0267247
18	spring	deep	GT3	0	0	0.00775876	0.151527	0	0.737035	0.00509883	0.0479492	0.114119	0.784623	0.0252962	0.0580569	0.00511435	0.0480113	0.050169	0	0.0311262	0.00773651	0.00423376	0.130139	2.3515	0.0818754	0.0347371	0.115527	0.0463169	0.048131	0.035127	0.115842	0.0115793	0.0354173	0.111811	0.05042	0.0316791	0.0242255	0.0429796	0	0.0679527	0	0.116376	0.00931366	0.171579	0.00723709	0	0.102881	0.00916721	0.0171925
19	winter	deep	GT3	0	0	0	0.153766	0	0.60614	0	0.0332163	0.106976	0.669956	0.0182282	0.0598337	0.00413899	0.0675455	0.0461934	0	0.0755732	0.00627728	0.0032991	0.138036	1.93724	0.0891139	0.0343165	0.127992	0.0488249	0.0500474	0.0252581	0.119018	0.00986205	0.0339048	0.087483	0.0644971	0.0295743	0.043605	0.0441285	0	0.0678732	0	0.16627	0	0.160615	0.00367953	0	0.160221	0.00751356	0.0180443
20	spring	200	GT5	0.0254352	0.00809245	0.00599946	0	0.0323179	0.00803839	0.0363369	0.0837597	0.017697	0.00479313	0.0313768	0.0249137	0.0165735	0	0.0297874	0.00956376	0	0.00479167	0.0218453	0	0.61963	0	0.0232124	0	0.129324	0.027239	0.0526676	0.0824817	0.00366968	0.0371628	0.184877	0.03177	0.0315338	0	0.0623123	0	0.0269761	0.00617651	0.773201	0.00398831	0	0.00372134	0.0780675	0.787747	0.00279195	0.0475424
21	winter	200	GT5	0.043086	0.0150029	0.00931036	0	0.0513482	0.0124188	0.0409667	0.143387	0.0387567	0.00759857	0.038961	0.0506462	0.0289223	0	0.0685309	0.0169801	0	0.00775226	0.0378722	0.0146143	1.29599	0	0.0524779	0.0202508	0.292524	0.0550909	0.151428	0.0831899	0.00601185	0.0864347	0.603757	0.0487861	0.0725413	0.00432961	0.100044	0	0.0533663	0.0162415	1.88112	0.00585378	0.0368075	0.0055209	0.0910516	1.78895	0.00487633	0.0766265
22	spring	500	GT5	0.0390422	0.00885327	0.0248011	0.00716942	0.0290866	0.0489827	0.021788	0.159059	0.0295205	0.0458553	0.105204	0.0307343	0.0171164	0.00381888	0.0338418	0.0104643	0.0032283	0.0112488	0.02019	0.0139126	0.714799	0	0.0302579	0.0207357	0.126892	0.0315678	0.0616391	0.0849884	0.00827545	0.0487803	0.331693	0.0319529	0.0482723	0.0114881	0.0492901	0	0.0339998	0.0224542	0.806095	0.0249591	0.0296389	0.0240809	0	0.661491	0.00678634	0.0531409
23	winter	500	GT5	0.0431261	0.0126639	0.020135	0.0236091	0.0488766	0.0543981	0.0284186	0.177185	0.0731142	0.0520349	0.0930532	0.0661667	0.0341837	0.00732378	0.0797273	0.0180667	0.00691888	0.0135604	0.0244792	0.0369931	1.4251	0	0.0693496	0.061467	0.24717	0.0719452	0.119735	0.11009	0.0116419	0.111419	0.695227	0.0583835	0.0865255	0.0223699	0.112333	0	0.0761258	0.0479026	0.984151	0.019709	0.0614107	0.0186084	0	0.816546	0.00880569	0.208142
24	spring	1500	GT5	0.0228644	0	0.025345	0.0720585	0.00771226	0.163143	0	0.0952548	0.110306	0.171126	0.0419651	0.0545353	0.00538011	0.0115648	0.054839	0.0034941	0.0112649	0.0124426	0.0034967	0.0868394	0.808479	0.0132737	0.0445599	0.136679	0.0474452	0.0506407	0.0691881	0.111547	0.0150245	0.0572534	0.232497	0.0205385	0.0460685	0.0367781	0.0527372	0	0.0647162	0.0672936	0.0989735	0.0286603	0.086123	0.0277136	0	0.0610488	0.0148133	0.023454
25	winter	1500	GT5	0.0176248	0	0.0164927	0.0947873	0.00973927	0.142064	0	0.0841851	0.145431	0.156042	0.0312256	0.0747237	0.00419592	0.028079	0.0718988	0.00386505	0.030129	0.00909752	0	0.120013	0.78238	0.0181182	0.0589393	0.186302	0.0636815	0.0669503	0.0535986	0.132414	0.012214	0.0711315	0.268241	0.0309477	0.0585902	0.0831861	0.0743609	0	0.0860671	0.0661566	0.165404	0.0182807	0.117599	0.0174927	0	0.0910964	0.0112996	0.0347295
26	spring	deep	GT5	0	0	0.00451362	0.130072	0	0.446966	0	0.0170505	0.0797094	0.41616	0	0.0395026	0	0.0407876	0.0381092	0	0.0384486	0.00392024	0	0.110019	0.69569	0.136146	0.0228735	0.107208	0	0.0320533	0	0.0834119	0.00568708	0.020926	0.0444294	0.0256224	0.0209604	0.0262766	0.0313854	0	0.0431365	0	0.0997242	0.00433315	0.133659	0	0	0.0766139	0	0.0172732
27	spring	200	GT6	0.0766231	0.0255256	0.0287811	0.00808868	0.044275	0.0544934	0.0614609	0.286263	0.0540875	0.0469996	0.112987	0.0556574	0.047042	0.00473977	0.0690747	0.0148013	0.00435789	0.0170589	0.0592104	0.0173801	0.788335	0	0.0575402	0.0239778	0.163171	0.0601602	0.100388	0.0871679	0.0128045	0.0926852	0.409354	0.0494018	0.0740129	0.0143702	0.0982036	0	0.0618787	0.0259031	0.961288	0.0251603	0.037611	0.0235624	0.0200331	0.84712	0.0106694	0.0738378
28	winter	200	GT6	0.0881618	0.0466907	0.0108827	0	0.0328561	0.0092074	0.032745	0.128226	0.0282328	0.0044608	0.0216709	0.042321	0.0233086	0	0.0624098	0.00943765	0	0.00923651	0.029717	0.0109063	0.965778	0	0.0431144	0.0177582	0.199067	0.0425706	0.0946185	0.067471	0.00694736	0.0669274	0.463497	0.0352894	0.0598899	0	0.0834749	0.0094375	0.0436546	0.01341	1.90244	0.00532435	0.0326743	0.00519608	0.120374	1.85043	0.00578772	0.0700347
29	spring	500	GT6	0.0459357	0.0313546	0.00897166	0	0.0325709	0.00759843	0.0276767	0.0926307	0.0297952	0.00430128	0.0162352	0.0408668	0.016595	0	0.054582	0.00954594	0	0.00575102	0.021722	0.0117281	0.644416	0	0.0386548	0.0133375	0.157429	0.0420933	0.0683613	0.0750988	0.00468931	0.0592235	0.296077	0.0411749	0.0527356	0	0.0793927	0.0080034	0.0423624	0.0113868	1.09959	0.00472555	0.0264261	0.00447776	0.105895	1.10657	0.00364514	0.0372714
30	winter	500	GT6	0.0460252	0.0172823	0.0280153	0.013728	0.0484316	0.0354625	0.0342362	0.17385	0.0608932	0.0323483	0.0708474	0.0606363	0.0249785	0.00423296	0.0745194	0.0179609	0.003779	0.01009	0.0309206	0.0236365	1.06246	0	0.0627047	0.0362673	0.251907	0.064528	0.124972	0.0954208	0.00895551	0.102541	0.688476	0.0496173	0.0810872	0.0136528	0.104911	0	0.0673408	0.0309349	1.44316	0.0187218	0.0474828	0.0181783	0.0153129	1.25195	0.00664572	0.0749105
31	spring	1500	GT6	0.025091	0	0.023124	0.060324	0.01398	0.173972	0.00502724	0.114436	0.137242	0.187061	0.0676959	0.0790546	0.0058815	0.019173	0.0812729	0.00727935	0.0202925	0.0152243	0.00361014	0.0828665	1.15693	0.0150109	0.0717068	0.131071	0.0824784	0.077404	0.0848951	0.132389	0.0171828	0.104242	0.36313	0.0362957	0.0786527	0.0584465	0.0910274	0	0.094708	0.0685523	0.305763	0.0261519	0.0938801	0.0278282	0	0.196555	0.0161847	0.0321297
32	winter	1500	GT6	0.0250749	0	0.0209026	0.0732431	0.0127694	0.18554	0.00586458	0.122874	0.137811	0.203148	0.0669475	0.0778997	0.00582013	0.0218051	0.0763928	0.00688943	0.0225426	0.0146633	0.00336918	0.0982999	1.07002	0.0158946	0.0663103	0.154163	0.0824549	0.0736301	0.0720744	0.132665	0.017011	0.0902119	0.384547	0.0407755	0.0694558	0.0846	0.0887529	0	0.0907793	0.0673199	0.304432	0.023923	0.10398	0.0225713	0	0.196194	0.0159853	0.0394999
33	spring	deep	GT6	0	0	0.00359454	0.201385	0	0.552404	0	0.0179608	0.093355	0.542899	0.00872669	0.048161	0	0.116995	0.0448745	0	0.122535	0.00333471	0	0.162228	0.584039	0.200387	0.0272159	0.163993	0	0.0385552	0	0.0973171	0.00510764	0.0236872	0.0384748	0.0344731	0.0241749	0.0651301	0.0374373	0	0.0517926	0	0.134778	0	0.179962	0	0	0.115465	0	0.0174123
34	winter	deep	GT6	0	0	0	0.162593	0	0.454093	0	0.0102679	0.0546809	0.430446	0	0.0341002	0	0.0845796	0.0307066	0	0.0848099	0	0	0.132774	0.413233	0.22127	0.0184586	0.143646	0	0.0274055	0	0.0736304	0	0.015445	0.0335836	0.0284495	0.0155623	0.0437892	0.0264041	0	0.0341929	0	0.156758	0	0.145635	0	0	0.148256	0	0.0169711
35	spring	200	GT7	0.0947495	0.0860833	0.0121773	0	0.0161786	0.00843012	0.0288203	0.126931	0.0229181	0.00429321	0.00992836	0.0282722	0.0204581	0	0.0448938	0.00390239	0	0.00867882	0.0265733	0.0097772	0.498518	0	0.0292278	0.0132441	0.0838444	0.0297299	0.0529676	0.0676566	0.00670533	0.0435325	0.269217	0.0178306	0.0402052	0	0.0573469	0.0154406	0.0312413	0.0116658	0.793284	0.005573	0.0260199	0.00539175	0.0698945	0.781694	0.00603059	0.0244093
36	winter	200	GT7	0.016326	0.0178487	0	0	0	0	0.0101358	0.0031962	0.00761554	0	0	0.0135685	0.00471803	0	0.0145871	0	0	0.00494792	0.00534059	0	0.152567	0	0.00768991	0	0.0944993	0.0101596	0.0196014	0.042752	0.00374003	0.0092921	0.0746752	0.0139359	0.00980414	0	0.0179839	0.01463	0.0167622	0	0.869678	0	0	0	0.434654	1.00706	0.00314625	0.0133378
37	winter	500	GT7	0.106999	0.0989713	0.0174161	0.0156605	0.0205326	0.0168552	0.0368561	0.157783	0.053693	0.0122671	0.0129643	0.0516745	0.0272675	0	0.080846	0.00611554	0	0.0079633	0.048689	0.026267	0.730037	0	0.0566112	0.0412741	0.0748493	0.0545801	0.094808	0.0941116	0.00767629	0.0860291	0.586849	0.0258909	0.0754601	0.0117278	0.10591	0.0220232	0.0599847	0.039269	0.629587	0.00933242	0.0580329	0.00877677	0.00946365	0.516906	0.00615011	0.068965
38	winter	1500	GT7	0.0175947	0	0.0154124	0.102254	0.0102865	0.115573	0.00493602	0.0836726	0.152301	0.124979	0.0245581	0.0764573	0.00409567	0.0236728	0.0787062	0.00300678	0.0257067	0.00804742	0.00297115	0.134305	0.590597	0.0171855	0.0626122	0.236667	0.0611529	0.0700767	0.0479572	0.12727	0.0102091	0.076125	0.264436	0.0291477	0.0636773	0.0754669	0.0785113	0	0.0874241	0.0746202	0.131239	0.0167142	0.122424	0.0159599	0	0.0656089	0.00910372	0.0395449
39	spring	200	GT9	0.0489229	0.0692525	0.00299471	0.00910984	0	0	0.00920893	0	0.0149134	0	0	0.0131165	0.00551479	0	0.024184	0	0	0.0056392	0.00663648	0.00865086	0.138896	0	0.0106687	0.0168056	0.0251243	0.0123599	0.0131019	0.0654692	0.00432543	0.00933318	0.150822	0	0.0115406	0	0.017096	0.138328	0.0155402	0	0.194284	0	0.019193	0	0.0908999	0.216475	0.00398823	0
40	winter	200	GT9	0.0451328	0.0667034	0.00347282	0.0101568	0	0	0.00721117	0	0.0262549	0	0	0.0199452	0.00411962	0	0.0395641	0	0	0.00395013	0.00480469	0.0111234	0.0740803	0	0.0160554	0.0161984	0.0270218	0.0189837	0	0.0526796	0.00318102	0.0137661	0.140279	0	0.0178696	0	0.0251691	0.207814	0.0230087	0	0.156081	0	0.0210743	0	0.04159	0.157551	0.00285753	0
41	spring	500	GT9	0.340786	0.438172	0.0143111	0.0148638	0	0.0150833	0.0276309	0.062072	0.0422998	0.00755207	0.00429433	0.0337389	0.0229875	0	0.0773137	0	0	0.014917	0.0270043	0.0214916	0.394954	0	0.0343759	0.0381786	0.0393578	0.0341252	0.0387771	0.0760728	0.0123069	0.0404898	0.242103	0.0179283	0.0420903	0.0123824	0.0604168	0.146302	0.0380602	0.0291713	0.21177	0.00549673	0.0445214	0.00547766	0.0104137	0.170997	0.0113348	0.0508571
42	winter	500	GT9	0.295279	0.371108	0.0108149	0.023457	0	0.0124177	0.0174096	0.0282632	0.0621404	0.00632372	0	0.0435007	0.0120958	0	0.088	0	0	0.00991592	0.0143934	0.0275766	0.347436	0.00679834	0.0420346	0.0578168	0.0551854	0.0430001	0.0391395	0.0840504	0.00873527	0.0427949	0.247317	0	0.0493136	0.0134861	0.0649617	0.266576	0.047917	0.0281818	0.199687	0.00408464	0.050638	0.00410007	0.0165261	0.175978	0.00771443	0.0510311
43	winter	1500	GT9	0.0167904	0	0.0119468	0.0715175	0	0.108832	0	0.084174	0.158534	0.115271	0.0174737	0.0692997	0.00284559	0.0222659	0.0720197	0	0.0239619	0.00427939	0	0.0951361	0.226909	0.01743	0.0518571	0.155001	0.041923	0.0585154	0.0347144	0.131474	0.00631234	0.0523232	0.109202	0.0177504	0.0504644	0.0719545	0.064533	0	0.0756806	0.0485056	0.0994766	0.0121599	0.0881721	0.0115828	0	0.0347522	0.00547299	0.0314035
44	spring	deep	GT10	0	0	0.00903181	0.0728169	0	0.958475	0	0.0127203	0.0217099	0.824878	0	0.0156537	0	0.0901773	0.0131546	0	0.0830527	0	0	0.0552948	0.0635667	0.169033	0.00870577	0.077766	0	0.013079	0	0.0409719	0	0.0062948	0	0	0.00662393	0.0447395	0.0126018	0	0.0177676	0	0.0763417	0.00851307	0.0565933	0.00824922	0	0.075825	0	0.019366
[truncated: 140 more columns]
